# Supplementary material
Source: publisher figshare collection journal article supplement (https://acs.figshare.com/ndownloader/files/3945868)
Supplement: Supplementary file 1 [file 3945868]

 
data_M10Giso
 
_audit_creation_method            SHELXL-2013
_chemical_name_systematic
;
 ?
;
_chemical_name_common             ?
_chemical_melting_point           ?
_chemical_formula_moiety          
 'C214 H140 Cu16 N46 O19, 5(C5 H5 N)'
_chemical_formula_sum
 'C239 H165 Cu16 N51 O19' 
_chemical_formula_weight          5071.85

loop_
 _atom_type_symbol
 _atom_type_description
 _atom_type_scat_dispersion_real
 _atom_type_scat_dispersion_imag
 _atom_type_scat_source
 'C'  'C'  -0.0020   0.0020 
 'WCROMER Program in WinGX L.Kissel & R.H.Pratt Acta Cryst A46 170 1990' 
 'H'  'H'   0.0000   0.0000 
 'WCROMER Program in WinGX L.Kissel & R.H.Pratt Acta Cryst A46 170 1990' 
 'Cu'  'Cu'   0.1330   1.4803 
 'WCROMER Program in WinGX L.Kissel & R.H.Pratt Acta Cryst A46 170 1990' 
 'N'  'N'  -0.0031   0.0040 
 'WCROMER Program in WinGX L.Kissel & R.H.Pratt Acta Cryst A46 170 1990' 
 'O'  'O'  -0.0041   0.0074 
 'WCROMER Program in WinGX L.Kissel & R.H.Pratt Acta Cryst A46 170 1990'
 
_space_group_crystal_system       triclinic
_space_group_IT_number            2
_space_group_name_H-M_alt         'P -1'
_space_group_name_Hall            '-P 1'
 
_shelx_space_group_comment
;
The symmetry employed for this shelxl refinement is uniquely defined
by the following loop, which should always be used as a source of
symmetry information in preference to the above space-group names.
They are only intended as comments.
;
 
loop_
 _space_group_symop_operation_xyz
 'x, y, z'
 '-x, -y, -z'
 
_cell_length_a                    21.968(8)
_cell_length_b                    22.557(8)
_cell_length_c                    25.407(9)
_cell_angle_alpha                 65.291(5)
_cell_angle_beta                  64.961(5)
_cell_angle_gamma                 76.157(5)
_cell_volume                      10333(6)
_cell_formula_units_Z             2
_cell_measurement_temperature     150(2)
_cell_measurement_reflns_used     9986 
_cell_measurement_theta_min       3.01 
_cell_measurement_theta_max       21.89 
 
_exptl_crystal_description        plate 
_exptl_crystal_colour             'dark green'
_exptl_crystal_density_meas       ? 
_exptl_crystal_density_method     ?              
_exptl_crystal_density_diffrn     1.630          
_exptl_crystal_F_000              5144
_exptl_transmission_factor_min    ?                                             
_exptl_transmission_factor_max    ?                                             
_exptl_crystal_size_max           0.10 
_exptl_crystal_size_mid           0.08 
_exptl_crystal_size_min           0.02
_exptl_absorpt_coefficient_mu     2.137
_shelx_estimated_absorpt_T_min    0.81 
_shelx_estimated_absorpt_T_max    0.95 
_exptl_absorpt_correction_type    multi-scan 
_exptl_absorpt_correction_T_min   0.334 
_exptl_absorpt_correction_T_max   0.745 
_exptl_absorpt_process_details    'SADABS Bruker AXS Madison WI US' 
 
_exptl_special_details
;
 ?
;
 
_diffrn_ambient_temperature       150(2)
_diffrn_radiation_wavelength      0.7749
_diffrn_radiation_type            synchrotron
_diffrn_radiation_source          'Advanced Light Source station 11.3.1'
_diffrn_radiation_monochromator   'silicon 111'
_diffrn_measurement_device_type   'Bruker APEX II CCD diffractometer'
_diffrn_measurement_method        '\w rotation with narrow frames'
_diffrn_detector_area_resol_mean  ? 
_diffrn_reflns_number             23163
_diffrn_reflns_av_unetI/netI      0.1585
_diffrn_reflns_av_R_equivalents   0.0891
_diffrn_reflns_limit_h_min        -20
_diffrn_reflns_limit_h_max        20
_diffrn_reflns_limit_k_min        -21
_diffrn_reflns_limit_k_max        20
_diffrn_reflns_limit_l_min        -24
_diffrn_reflns_limit_l_max        16
_diffrn_reflns_theta_min          3.011
_diffrn_reflns_theta_max          21.900
_diffrn_reflns_theta_full         21.850
_diffrn_measured_fraction_theta_max   0.843
_diffrn_measured_fraction_theta_full  0.847
_diffrn_reflns_Laue_measured_fraction_max    0.843
_diffrn_reflns_Laue_measured_fraction_full   0.847
_diffrn_reflns_point_group_measured_fraction_max   0.843
_diffrn_reflns_point_group_measured_fraction_full  0.847
_reflns_number_total              16264
_reflns_number_gt                 9603
_reflns_threshold_expression      'I > 2\s(I)'
_reflns_Friedel_coverage          0.000
_reflns_Friedel_fraction_max      .
_reflns_Friedel_fraction_full     .
 
_reflns_special_details
;
 Reflections were merged by SHELXL according to the crystal
 class for the calculation of statistics and refinement.
 
 _reflns_Friedel_fraction is defined as the number of unique
 Friedel pairs measured divided by the number that would be
 possible theoretically, ignoring centric projections and
 systematic absences.
;
 
_computing_data_collection        'Bruker APEX 2'
_computing_cell_refinement        'Bruker SAINT'
_computing_data_reduction         'Bruker SAINT'
_computing_structure_solution     'SHELXT' 
_computing_structure_refinement   'SHELXL-2013 (Sheldrick, 2013)'
_computing_molecular_graphics     ?
_computing_publication_material   ?
 
_refine_special_details
;
 The structure was initially solved in P1, with slightly different Cu16 
 moeities in the asymmetric unit. PLATON/ADDSYM was used to identify the 
 missed symmetry and produce the corresponding shelx file. The resulting 
 model in P-1 with only one Cu16 per asymmetric unit had slightly worse R 
 factors, probably due to the presence of slight differences in the lattice
 solvent molecules and/or Cu16 molecules over the crystal. Only copper
 atoms were refined anisotropically due strong disorder and much too few
 data to refine anisotropically the carbon atoms. Each lattice pyridine
 molecules was refined with one same isotropic parameter for its six atoms
 and a rough rigid body restraint (AFIX 66).
 Hydrogens were placed geometrically on their carrier atom and refined with
 a riding model. At the end of the refinement there remained a small void 
 with no significant electron density, that was analyzed and taken into 
 account with PLATON/SQUEEZE, that recovered only ca. 11 electrons per 
 void of ca. 287 cubic angstrom (2 voids per cell), in agreement with the 
 absence of significant additional lattice solvent.
;

_vrf_PLAT027_M10Giso
;
PROBLEM:  _diffrn_reflns_theta_full (too) Low ............      21.85 Deg.
RESPONSE: Repeatedly on several crystals, there was significant 
diffraction only up to ca. 1.1 angstrom resolution. The present data 
were cut at 1.04 angstrom as then I/sigma(I) was below 2, and 
completeness dropped abruptly. This results in low themamax, thetafull
and poor data over parameters ratio, and globally a poor quality of the 
structure. This is likely related to poor crystallinity related to loss of
diffuse lattice solvent.
;

_vrf_PLAT029_M10Giso
;
PROBLEM:  _diffrn_measured_fraction_theta_full Low .......      0.847
RESPONSE: Repeatedly on several crystals, there was significant 
diffraction only up to ca. 1.1 angstrom resolution. The present data 
were cut at 1.04 angstrom as then I/sigma(I) was below 2, and 
completeness dropped abruptly. This results in low themamax, thetafull,
poor completeness and poor data over parameters ratio, and globally a poor
quality of the structure. This is likely related to poor crystallinity 
related to loss of diffuse lattice solvent.
;

_vrf_PLAT201_M10Giso
;
PROBLEM:  Isotropic non-H Atoms in Main Residue(s) .......        279 Why ?
RESPONSE: The present data were cut at 1.04 angstrom  This is likely 
related to large voids containing only very diffuse lattice solvent. This 
results in low themamax and very poor number of data. To maintain a 
reasonable ratio data over parameters, only copper atoms were refined 
anisotropically.
;

_vrf_RFACR01_M10Giso
;
PROBLEM:  The value of the weighted R factor is > 0.45
RESPONSE: Repeatedly on several crystals, there was significant 
diffraction only up to ca. 1.1 angstrom resolution. The present data 
were cut at 1.04 angstrom as then I/sigma(I) was below 2, and 
completeness dropped abruptly. This results in low themamax, thetafull,
poor completeness and poor data over parameters ratio, and globally a poor
quality of the structure. To maintain a reasonable ratio data over 
parameters, only copper atoms were refined anisotropically, resulting in
ever higher residuals. All this is likely related to poor crystallinity 
related to loss of diffuse lattice solvent.
;

_vrf_RFACG01_M10Giso
;
PROBLEM:  The value of the R factor is > 0.20
RESPONSE: Repeatedly on several crystals, there was significant 
diffraction only up to ca. 1.1 angstrom resolution. The present data 
were cut at 1.04 angstrom as then I/sigma(I) was below 2, and 
completeness dropped abruptly. This results in low themamax, thetafull,
poor completeness and poor data over parameters ratio, and globally a poor
quality of the structure. To maintain a reasonable ratio data over 
parameters, only copper atoms were refined anisotropically, resulting in
ever higher residuals. All this is likely related to poor crystallinity 
related to loss of diffuse lattice solvent.
;

_vrf_THETM01_M10Giso
;
PROBLEM:  The value of sine(theta_max)/wavelength is less than 0.550
            Calculated sin(theta_max)/wavelength =    0.4813
RESPONSE: Repeatedly on several crystals, there was significant 
diffraction only up to ca. 1.1 angstrom resolution. The present data 
were cut at 1.04 angstrom as then I/sigma(I) was below 2, and 
completeness dropped abruptly. This results in low themamax, thetafull,
poor completeness and poor data over parameters ratio, and globally a poor
quality of the structure. To maintain a reasonable ratio data over 
parameters, only copper atoms were refined anisotropically, resulting in
ever higher residuals. All this is likely related to poor crystallinity 
related to loss of diffuse lattice solvent.
;

loop_
  _platon_squeeze_void_nr             
  _platon_squeeze_void_average_x      
  _platon_squeeze_void_average_y      
  _platon_squeeze_void_average_z      
  _platon_squeeze_void_volume         
  _platon_squeeze_void_count_electrons
         1     0.055     0.530     0.482      14.1      -0.6
         2     0.093     0.130     0.561       7.3       0.5
         3     0.396     0.474     0.880     286.6      10.9
         4     0.217     0.476     0.641      12.0       0.0
         5     0.266     0.818     0.331      12.6       1.3
         6     0.604     0.526     0.120     287.3      10.7
         7     0.376     0.135     0.845       9.7      -1.0
         8     0.455     0.426     0.983       9.2      -0.5
         9     0.544     0.574     0.017       8.6      -0.3
        10     0.624     0.865     0.155       9.7      -1.0
        11     0.734     0.182     0.669      12.6       1.4
        12     0.783     0.524     0.359      12.0       0.0
        13     0.907     0.870     0.439       7.3       0.5
        14     0.942     0.468     0.519      12.5      -0.2
_platon_squeeze_details             
;
;

_refine_ls_structure_factor_coef  Fsqd
_refine_ls_matrix_type            full
_refine_ls_weighting_scheme       calc
_refine_ls_weighting_details
'w=1/[\s^2^(Fo^2^)+(0.0012P)^2^+1409.7310P] where P=(Fo^2^+2Fc^2^)/3'
_atom_sites_solution_primary      ?
_atom_sites_solution_secondary    ?
_atom_sites_solution_hydrogens    geom
_refine_ls_hydrogen_treatment     constr
_refine_ls_extinction_method      none
_refine_ls_extinction_coef        .
_refine_ls_number_reflns          16264
_refine_ls_number_parameters      1296
_refine_ls_number_restraints      32
_refine_ls_R_factor_all           0.2602
_refine_ls_R_factor_gt            0.2020
_refine_ls_wR_factor_ref          0.4771
_refine_ls_wR_factor_gt           0.4554
_refine_ls_goodness_of_fit_ref    1.106
_refine_ls_restrained_S_all       1.105
_refine_ls_shift/su_max           0.000
_refine_ls_shift/su_mean          0.000
 
loop_
 _atom_site_label
 _atom_site_type_symbol
 _atom_site_fract_x
 _atom_site_fract_y
 _atom_site_fract_z
 _atom_site_U_iso_or_equiv
 _atom_site_adp_type
 _atom_site_occupancy
 _atom_site_site_symmetry_order  
 _atom_site_calc_flag
 _atom_site_refinement_flags_posn
 _atom_site_refinement_flags_adp
 _atom_site_refinement_flags_occupancy
 _atom_site_disorder_assembly
 _atom_site_disorder_group
Cu1 Cu 0.5579(3) 0.1547(3) -0.0361(3) 0.0520(16) Uani 1 1 d . . . . .
Cu2 Cu 0.4832(3) 0.0659(3) 0.1440(3) 0.0539(16) Uani 1 1 d . . . . .
Cu3 Cu 0.4341(3) 0.1916(3) 0.2136(3) 0.0568(17) Uani 1 1 d . . . . .
Cu4 Cu 0.4565(3) 0.2509(3) 0.2881(3) 0.0559(17) Uani 1 1 d . . . . .
Cu5 Cu 0.4331(3) 0.2961(3) 0.3911(3) 0.0576(17) Uani 1 1 d . . . . .
Cu6 Cu 0.5105(3) 0.3858(3) 0.4381(3) 0.0561(17) Uani 1 1 d . . . . .
Cu7 Cu 0.6295(3) 0.2620(3) 0.5223(3) 0.0530(16) Uani 1 1 d . . . . .
Cu8 Cu 0.7722(3) 0.2023(3) 0.4422(3) 0.0511(16) Uani 1 1 d . . . . .
Cu9 Cu 0.9301(3) 0.1475(3) 0.4168(2) 0.0487(15) Uani 1 1 d . . . . .
Cu10 Cu 1.0074(3) 0.0519(2) 0.3076(2) 0.0466(15) Uani 1 1 d . . . . .
Cu11 Cu 1.0380(3) 0.1795(2) 0.1496(2) 0.0451(15) Uani 1 1 d . . . . .
Cu12 Cu 1.0090(3) 0.2356(3) 0.0342(3) 0.0533(16) Uani 1 1 d . . . . .
Cu13 Cu 1.0344(3) 0.2755(3) -0.1008(3) 0.0501(15) Uani 1 1 d . . . . .
Cu14 Cu 0.9676(3) 0.3557(3) -0.2266(3) 0.0589(17) Uani 1 1 d . . . . .
Cu15 Cu 0.8593(3) 0.2335(3) -0.2155(3) 0.0525(16) Uani 1 1 d . . . . .
Cu16 Cu 0.7112(3) 0.1991(3) -0.1045(2) 0.0495(15) Uani 1 1 d . . . . .
O1 O 0.6484(13) 0.1405(12) -0.0896(12) 0.041(7) Uiso 1 1 d . . . . .
O2 O 0.3958(14) 0.2022(13) 0.2931(13) 0.050(8) Uiso 1 1 d . . . . .
O3 O 0.4059(16) 0.3258(15) 0.3203(15) 0.064(9) Uiso 1 1 d . . . . .
O4 O 0.7280(13) 0.2609(13) 0.4945(13) 0.047(7) Uiso 1 1 d . . . . .
O5 O 0.8401(13) 0.1367(12) 0.4806(12) 0.042(7) Uiso 1 1 d . . . . .
O6 O 1.0745(14) 0.1829(14) 0.0645(14) 0.053(8) Uiso 1 1 d . . . . .
O7 O 1.0504(15) 0.3080(14) -0.0475(14) 0.057(8) Uiso 1 1 d . . . . .
O8 O 0.7665(14) 0.2478(13) -0.2011(13) 0.050(7) Uiso 1 1 d . . . . .
O9 O 0.9523(16) 0.2110(15) -0.2446(15) 0.064(9) Uiso 1 1 d . . . . .
O10 O 0.4655(15) 0.2649(15) 0.2058(15) 0.062(8) Uiso 1 1 d . . . . .
O11 O 0.4486(15) 0.2198(14) 0.3722(14) 0.058(8) Uiso 1 1 d . . . . .
O12 O 1.0174(13) 0.1592(12) 0.3849(12) 0.041(7) Uiso 1 1 d . . . . .
O13 O 0.5407(16) 0.2515(15) 0.5752(15) 0.065(9) Uiso 1 1 d . . . . .
O14 O 0.9972(12) 0.2545(12) 0.1031(12) 0.038(7) Uiso 1 1 d . . . . .
O15 O 1.0220(12) 0.1992(12) -0.0264(12) 0.038(7) Uiso 1 1 d . . . . .
O16 O 0.4665(17) 0.1755(17) -0.0104(16) 0.076(10) Uiso 1 1 d . . . . .
O17 O 0.4030(15) 0.1340(14) 0.1113(14) 0.058(8) Uiso 1 1 d . . . . .
O18 O 1.0450(14) 0.2825(14) -0.2648(14) 0.055(8) Uiso 1 1 d . . . . .
O19 O 0.4518(15) 0.3285(15) 0.5232(15) 0.063(9) Uiso 1 1 d . . . . .
N1 N 0.5547(15) 0.0658(15) 0.0143(15) 0.035(8) Uiso 1 1 d . . . . .
N2 N 0.5179(16) 0.0360(15) 0.0732(15) 0.037(8) Uiso 1 1 d . . . . .
N3 N 0.4623(19) -0.0242(18) 0.1849(18) 0.058(10) Uiso 1 1 d . . . . .
N4 N 0.4286(16) 0.0609(16) 0.2290(15) 0.040(8) Uiso 1 1 d . . . . .
N5 N 0.3998(16) 0.1073(15) 0.2560(15) 0.041(9) Uiso 1 1 d . . . . .
N6 N 0.4076(18) 0.3818(18) 0.3935(17) 0.056(10) Uiso 1 1 d . . . . .
N7 N 0.4403(16) 0.4118(16) 0.4091(15) 0.041(9) Uiso 1 1 d . . . . .
N8 N 0.5018(16) 0.4761(15) 0.4244(15) 0.041(9) Uiso 1 1 d . . . . .
N9 N 0.5785(16) 0.3944(16) 0.4673(16) 0.043(9) Uiso 1 1 d . . . . .
N10 N 0.6273(17) 0.3525(16) 0.4872(16) 0.045(9) Uiso 1 1 d . . . . .
N11 N 0.9371(15) 0.0587(14) 0.4362(14) 0.032(8) Uiso 1 1 d . . . . .
N12 N 0.9790(18) 0.0296(17) 0.3952(17) 0.052(10) Uiso 1 1 d . . . . .
N13 N 1.0504(18) -0.0372(17) 0.3325(18) 0.053(10) Uiso 1 1 d . . . . .
N14 N 1.0708(17) 0.0572(17) 0.2231(17) 0.049(9) Uiso 1 1 d . . . . .
N15 N 1.0871(16) 0.0972(16) 0.1693(16) 0.041(9) Uiso 1 1 d . . . . .
N16 N 1.0536(18) 0.3564(17) -0.1604(17) 0.052(10) Uiso 1 1 d . . . . .
N17 N 1.0332(17) 0.3815(17) -0.2113(16) 0.047(9) Uiso 1 1 d . . . . .
N18 N 0.987(2) 0.4319(19) -0.2887(19) 0.063(11) Uiso 1 1 d . . . . .
N19 N 0.9144(16) 0.3635(16) -0.2775(16) 0.043(9) Uiso 1 1 d . . . . .
N20 N 0.868(2) 0.3231(19) -0.2619(19) 0.065(11) Uiso 1 1 d . . . . .
N21 N 0.8472(14) 0.1565(15) -0.1604(13) 0.038(8) Uiso 1 1 d D . . . .
N22 N 0.7900(16) 0.1421(18) -0.1061(15) 0.061(11) Uiso 1 1 d D . . . .
N23 N 0.6978(14) 0.1129(13) 0.0087(13) 0.025(7) Uiso 1 1 d . . . . .
N24 N 0.5382(15) 0.1321(14) 0.1225(15) 0.037(8) Uiso 1 1 d D . . . .
N25 N 0.5098(18) 0.1906(15) 0.1327(18) 0.059(10) Uiso 1 1 d D . . . .
N26 N 0.5159(16) 0.2762(16) 0.4061(16) 0.044(9) Uiso 1 1 d . . . . .
N27 N 0.5521(17) 0.3214(16) 0.4000(16) 0.048(9) Uiso 1 1 d . . . . .
N28 N 0.7303(17) 0.3171(16) 0.3605(16) 0.045(9) Uiso 1 1 d . . . . .
N29 N 0.8440(18) 0.2524(17) 0.3891(17) 0.051(10) Uiso 1 1 d . . . . .
N30 N 0.9097(16) 0.2324(15) 0.3855(15) 0.038(8) Uiso 1 1 d . . . . .
N31 N 0.6385(17) 0.1750(17) 0.5320(16) 0.048(9) Uiso 1 1 d . . . . .
N32 N 0.7001(19) 0.1583(18) 0.4868(18) 0.058(10) Uiso 1 1 d . . . . .
N33 N 0.7865(16) 0.1097(15) 0.4074(15) 0.037(8) Uiso 1 1 d . . . . .
N34 N 0.9421(17) 0.1192(16) 0.2843(16) 0.045(9) Uiso 1 1 d . . . . .
N35 N 0.9627(15) 0.1734(15) 0.2318(14) 0.034(8) Uiso 1 1 d . . . . .
N36 N 0.9575(16) 0.2566(15) -0.1108(15) 0.040(8) Uiso 1 1 d . . . . .
N37 N 0.926(2) 0.305(2) -0.148(2) 0.080(13) Uiso 1 1 d . . . . .
N38 N 0.7459(17) 0.3072(16) -0.1101(16) 0.049(9) Uiso 1 1 d . . . . .
N39 N 0.6349(19) 0.2567(18) -0.0901(18) 0.057(10) Uiso 1 1 d . . . . .
N40 N 0.5721(16) 0.2376(15) -0.0704(15) 0.040(9) Uiso 1 1 d . . . . .
N41 N 0.357(2) 0.251(2) 0.174(2) 0.071(12) Uiso 1 1 d . . . . .
N42 N 0.547(2) 0.273(2) 0.261(2) 0.077(12) Uiso 1 1 d . . . . .
N43 N 0.358(2) 0.2483(18) 0.4852(18) 0.059(10) Uiso 1 1 d . . . . .
N44 N 1.1180(16) 0.2220(15) 0.1583(15) 0.037(8) Uiso 1 1 d . . . . .
N45 N 0.9105(19) 0.2640(19) 0.0403(19) 0.060(11) Uiso 1 1 d . . . . .
N46 N 1.116(2) 0.216(2) -0.154(2) 0.076(12) Uiso 1 1 d . . . . .
C1 C 0.659(2) 0.089(2) -0.112(2) 0.061(13) Uiso 1 1 d . . . . .
C2 C 0.705(2) 0.100(2) -0.170(2) 0.047(11) Uiso 1 1 d . . . . .
H2A H 0.7309 0.1370 -0.1918 0.056 Uiso 1 1 calc R U . . .
C3 C 0.711(2) 0.0531(18) -0.1953(19) 0.037(10) Uiso 1 1 d . . . . .
H3A H 0.7402 0.0601 -0.2372 0.045 Uiso 1 1 calc R U . . .
C4 C 0.678(2) 0.002(2) -0.164(2) 0.060(13) Uiso 1 1 d . . . . .
H4A H 0.6840 -0.0263 -0.1859 0.072 Uiso 1 1 calc R U . . .
C5 C 0.634(2) -0.018(2) -0.101(2) 0.047(11) Uiso 1 1 d . . . . .
H5A H 0.6142 -0.0584 -0.0780 0.056 Uiso 1 1 calc R U . . .
C6 C 0.623(2) 0.034(2) -0.072(2) 0.061(13) Uiso 1 1 d . . . . .
C7 C 0.5830(18) 0.0142(18) -0.0099(18) 0.030(9) Uiso 1 1 d . . . . .
C8 C 0.5604(19) -0.0387(19) 0.0314(18) 0.034(10) Uiso 1 1 d . . . . .
H8A H 0.5662 -0.0796 0.0267 0.041 Uiso 1 1 calc R U . . .
C9 C 0.5243(19) -0.025(2) 0.0868(19) 0.038(10) Uiso 1 1 d . . . . .
C10 C 0.487(2) -0.065(2) 0.149(2) 0.043(11) Uiso 1 1 d . . . . .
C11 C 0.474(2) -0.128(2) 0.179(2) 0.042(11) Uiso 1 1 d . . . . .
H11A H 0.4924 -0.1573 0.1567 0.051 Uiso 1 1 calc R U . . .
C12 C 0.437(3) -0.150(3) 0.239(3) 0.080(16) Uiso 1 1 d . . . . .
H12A H 0.4262 -0.1940 0.2593 0.096 Uiso 1 1 calc R U . . .
C13 C 0.415(2) -0.108(2) 0.272(2) 0.063(14) Uiso 1 1 d . . . . .
H13A H 0.3927 -0.1254 0.3161 0.076 Uiso 1 1 calc R U . . .
C14 C 0.423(2) -0.050(2) 0.2460(19) 0.038(10) Uiso 1 1 d . . . . .
C15 C 0.407(2) 0.007(2) 0.264(2) 0.042(11) Uiso 1 1 d . . . . .
C16 C 0.360(2) 0.017(2) 0.318(2) 0.055(12) Uiso 1 1 d . . . . .
H16A H 0.3340 -0.0160 0.3543 0.066 Uiso 1 1 calc R U . . .
C17 C 0.3581(19) 0.0776(19) 0.3119(18) 0.035(10) Uiso 1 1 d . . . . .
C18 C 0.322(2) 0.117(2) 0.348(2) 0.044(11) Uiso 1 1 d . . . . .
C19 C 0.258(2) 0.094(2) 0.396(2) 0.046(11) Uiso 1 1 d . . . . .
H19A H 0.2419 0.0558 0.3998 0.056 Uiso 1 1 calc R U . . .
C20 C 0.224(3) 0.126(2) 0.432(2) 0.069(15) Uiso 1 1 d . . . . .
H20A H 0.1797 0.1141 0.4599 0.083 Uiso 1 1 calc R U . . .
C21 C 0.246(2) 0.1759(19) 0.433(2) 0.040(11) Uiso 1 1 d . . . . .
H21A H 0.2218 0.1918 0.4658 0.048 Uiso 1 1 calc R U . . .
C22 C 0.299(2) 0.202(2) 0.389(2) 0.050(12) Uiso 1 1 d . . . . .
H22A H 0.3111 0.2412 0.3860 0.060 Uiso 1 1 calc R U . . .
C23 C 0.342(2) 0.168(2) 0.343(2) 0.050(12) Uiso 1 1 d . . . . .
C24 C 0.3469(18) 0.3631(17) 0.3156(17) 0.029(9) Uiso 1 1 d . . . . .
C25 C 0.320(2) 0.3573(19) 0.2815(18) 0.037(10) Uiso 1 1 d . . . . .
H25A H 0.3380 0.3258 0.2620 0.045 Uiso 1 1 calc R U . . .
C26 C 0.263(2) 0.398(2) 0.274(2) 0.059(13) Uiso 1 1 d . . . . .
H26A H 0.2432 0.3944 0.2494 0.071 Uiso 1 1 calc R U . . .
C27 C 0.235(3) 0.445(2) 0.306(2) 0.063(14) Uiso 1 1 d . . . . .
H27A H 0.1942 0.4707 0.3045 0.076 Uiso 1 1 calc R U . . .
C28 C 0.269(2) 0.451(2) 0.335(2) 0.063(14) Uiso 1 1 d . . . . .
H28A H 0.2521 0.4828 0.3538 0.076 Uiso 1 1 calc R U . . .
C29 C 0.325(2) 0.415(2) 0.338(2) 0.049(12) Uiso 1 1 d . . . . .
C30 C 0.364(2) 0.427(2) 0.369(2) 0.056(13) Uiso 1 1 d . . . . .
C31 C 0.365(3) 0.484(2) 0.371(2) 0.067(14) Uiso 1 1 d . . . . .
H31A H 0.3365 0.5224 0.3607 0.080 Uiso 1 1 calc R U . . .
C32 C 0.414(3) 0.478(2) 0.392(2) 0.069(14) Uiso 1 1 d . . . . .
C33 C 0.4578(19) 0.5175(19) 0.3954(18) 0.035(10) Uiso 1 1 d . . . . .
C34 C 0.448(2) 0.584(2) 0.385(2) 0.048(12) Uiso 1 1 d . . . . .
H34A H 0.4113 0.6093 0.3728 0.058 Uiso 1 1 calc R U . . .
C35 C 0.488(2) 0.611(2) 0.391(2) 0.050(12) Uiso 1 1 d . . . . .
H35A H 0.4843 0.6571 0.3820 0.060 Uiso 1 1 calc R U . . .
C36 C 0.539(2) 0.570(2) 0.413(2) 0.064(14) Uiso 1 1 d . . . . .
H36A H 0.5705 0.5895 0.4157 0.076 Uiso 1 1 calc R U . . .
C37 C 0.543(3) 0.503(2) 0.429(2) 0.068(14) Uiso 1 1 d . . . . .
C38 C 0.591(2) 0.457(2) 0.4503(19) 0.041(11) Uiso 1 1 d . . . . .
C39 C 0.648(2) 0.456(2) 0.458(2) 0.050(12) Uiso 1 1 d . . . . .
H39A H 0.6696 0.4927 0.4491 0.060 Uiso 1 1 calc R U . . .
C40 C 0.668(2) 0.392(2) 0.481(2) 0.048(11) Uiso 1 1 d . . . . .
C41 C 0.730(2) 0.365(2) 0.495(2) 0.047(12) Uiso 1 1 d . . . . .
C42 C 0.772(3) 0.406(3) 0.490(2) 0.070(15) Uiso 1 1 d . . . . .
H42A H 0.7604 0.4524 0.4771 0.084 Uiso 1 1 calc R U . . .
C43 C 0.827(2) 0.382(2) 0.504(2) 0.059(13) Uiso 1 1 d . . . . .
H43A H 0.8490 0.4083 0.5106 0.071 Uiso 1 1 calc R U . . .
C44 C 0.851(3) 0.322(2) 0.508(2) 0.062(13) Uiso 1 1 d . . . . .
H44A H 0.8926 0.3052 0.5143 0.074 Uiso 1 1 calc R U . . .
C45 C 0.818(2) 0.285(2) 0.502(2) 0.048(11) Uiso 1 1 d . . . . .
H45A H 0.8375 0.2421 0.5028 0.057 Uiso 1 1 calc R U . . .
C46 C 0.7600(19) 0.3023(18) 0.4962(18) 0.033(10) Uiso 1 1 d . . . . .
C47 C 0.8318(19) 0.0914(18) 0.5363(18) 0.032(10) Uiso 1 1 d . . . . .
C48 C 0.784(2) 0.101(2) 0.5879(19) 0.039(10) Uiso 1 1 d . . . . .
H48A H 0.7546 0.1405 0.5833 0.047 Uiso 1 1 calc R U . . .
C49 C 0.776(2) 0.058(2) 0.645(2) 0.051(12) Uiso 1 1 d . . . . .
H49A H 0.7427 0.0657 0.6807 0.061 Uiso 1 1 calc R U . . .
C50 C 0.815(2) 0.004(2) 0.651(2) 0.049(12) Uiso 1 1 d . . . . .
H50A H 0.8078 -0.0269 0.6922 0.059 Uiso 1 1 calc R U . . .
C51 C 0.862(2) -0.012(2) 0.606(2) 0.056(12) Uiso 1 1 d . . . . .
H51A H 0.8904 -0.0506 0.6137 0.067 Uiso 1 1 calc R U . . .
C52 C 0.869(2) 0.030(2) 0.546(2) 0.045(11) Uiso 1 1 d . . . . .
C53 C 0.919(2) 0.013(2) 0.493(2) 0.046(11) Uiso 1 1 d . . . . .
C54 C 0.9522(18) -0.0498(18) 0.4898(18) 0.030(9) Uiso 1 1 d . . . . .
H54A H 0.9512 -0.0908 0.5228 0.036 Uiso 1 1 calc R U . . .
C55 C 0.9842(19) -0.0358(18) 0.4299(18) 0.034(10) Uiso 1 1 d . . . . .
C56 C 1.037(2) -0.074(2) 0.390(2) 0.041(11) Uiso 1 1 d . . . . .
C57 C 1.065(2) -0.136(2) 0.409(3) 0.066(14) Uiso 1 1 d . . . . .
H57A H 1.0555 -0.1629 0.4516 0.079 Uiso 1 1 calc R U . . .
C58 C 1.109(2) -0.155(2) 0.362(2) 0.058(13) Uiso 1 1 d . . . . .
H58A H 1.1294 -0.1982 0.3709 0.069 Uiso 1 1 calc R U . . .
C59 C 1.126(2) -0.1144(19) 0.3007(19) 0.039(10) Uiso 1 1 d . . . . .
H59A H 1.1580 -0.1295 0.2687 0.047 Uiso 1 1 calc R U . . .
C60 C 1.098(2) -0.054(2) 0.287(2) 0.043(11) Uiso 1 1 d . . . . .
C61 C 1.114(2) -0.008(2) 0.232(2) 0.042(11) Uiso 1 1 d . . . . .
C62 C 1.158(2) 0.0064(19) 0.1686(19) 0.040(11) Uiso 1 1 d . . . . .
H62A H 1.1929 -0.0227 0.1531 0.048 Uiso 1 1 calc R U . . .
C63 C 1.1407(19) 0.0705(18) 0.1320(18) 0.035(10) Uiso 1 1 d . . . . .
C64 C 1.1707(19) 0.1099(18) 0.0681(18) 0.035(10) Uiso 1 1 d . . . . .
C65 C 1.2392(18) 0.0873(18) 0.0384(18) 0.031(9) Uiso 1 1 d . . . . .
H65A H 1.2611 0.0499 0.0608 0.037 Uiso 1 1 calc R U . . .
C66 C 1.270(2) 0.1207(18) -0.0208(19) 0.038(10) Uiso 1 1 d . . . . .
H66A H 1.3162 0.1101 -0.0415 0.045 Uiso 1 1 calc R U . . .
C67 C 1.236(2) 0.170(2) -0.052(2) 0.049(12) Uiso 1 1 d . . . . .
H67A H 1.2582 0.1899 -0.0957 0.058 Uiso 1 1 calc R U . . .
C68 C 1.1724(19) 0.1937(19) -0.0277(18) 0.035(10) Uiso 1 1 d . . . . .
H68A H 1.1515 0.2302 -0.0520 0.043 Uiso 1 1 calc R U . . .
C69 C 1.138(2) 0.160(2) 0.038(2) 0.050(12) Uiso 1 1 d . . . . .
C70 C 1.097(2) 0.349(2) -0.065(2) 0.042(11) Uiso 1 1 d . . . . .
C71 C 1.125(2) 0.351(2) -0.029(2) 0.063(13) Uiso 1 1 d . . . . .
H71A H 1.1128 0.3183 0.0117 0.075 Uiso 1 1 calc R U . . .
C72 C 1.165(2) 0.389(2) -0.041(2) 0.054(12) Uiso 1 1 d . . . . .
H72A H 1.1760 0.3872 -0.0082 0.065 Uiso 1 1 calc R U . . .
C73 C 1.191(2) 0.431(2) -0.095(2) 0.064(14) Uiso 1 1 d . . . . .
H73A H 1.2251 0.4561 -0.1025 0.077 Uiso 1 1 calc R U . . .
C74 C 1.169(3) 0.440(3) -0.145(3) 0.099(19) Uiso 1 1 d . . . . .
H74A H 1.1855 0.4715 -0.1862 0.118 Uiso 1 1 calc R U . . .
C75 C 1.119(2) 0.396(2) -0.124(2) 0.045(11) Uiso 1 1 d . . . . .
C76 C 1.090(2) 0.402(2) -0.172(2) 0.056(13) Uiso 1 1 d . . . . .
C77 C 1.096(2) 0.454(2) -0.226(2) 0.065(14) Uiso 1 1 d . . . . .
H77A H 1.1209 0.4913 -0.2439 0.079 Uiso 1 1 calc R U . . .
C78 C 1.056(2) 0.439(2) -0.248(2) 0.049(12) Uiso 1 1 d . . . . .
C79 C 1.033(3) 0.467(3) -0.297(3) 0.070(15) Uiso 1 1 d . . . . .
C80 C 1.056(2) 0.523(2) -0.348(2) 0.055(12) Uiso 1 1 d . . . . .
H80A H 1.0936 0.5418 -0.3535 0.066 Uiso 1 1 calc R U . . .
C81 C 1.023(3) 0.552(3) -0.391(2) 0.071(15) Uiso 1 1 d . . . . .
H81A H 1.0344 0.5936 -0.4226 0.086 Uiso 1 1 calc R U . . .
C82 C 0.973(3) 0.520(2) -0.388(3) 0.072(15) Uiso 1 1 d . . . . .
H82A H 0.9520 0.5372 -0.4179 0.087 Uiso 1 1 calc R U . . .
C83 C 0.959(2) 0.460(2) -0.336(2) 0.050(12) Uiso 1 1 d . . . . .
C84 C 0.911(2) 0.418(2) -0.3215(19) 0.039(10) Uiso 1 1 d . . . . .
C85 C 0.865(2) 0.412(2) -0.338(2) 0.056(13) Uiso 1 1 d . . . . .
H85A H 0.8557 0.4442 -0.3732 0.068 Uiso 1 1 calc R U . . .
C86 C 0.834(2) 0.360(2) -0.304(2) 0.056(13) Uiso 1 1 d . . . . .
C87 C 0.775(2) 0.329(2) -0.296(2) 0.056(13) Uiso 1 1 d . . . . .
C88 C 0.759(2) 0.360(2) -0.352(2) 0.064(14) Uiso 1 1 d . . . . .
H88A H 0.7835 0.3933 -0.3883 0.077 Uiso 1 1 calc R U . . .
C89 C 0.707(2) 0.337(2) -0.347(2) 0.061(13) Uiso 1 1 d . . . . .
H89A H 0.6960 0.3525 -0.3832 0.073 Uiso 1 1 calc R U . . .
C90 C 0.667(3) 0.295(3) -0.296(3) 0.092(18) Uiso 1 1 d . . . . .
H90A H 0.6272 0.2825 -0.2930 0.111 Uiso 1 1 calc R U . . .
C91 C 0.689(3) 0.272(3) -0.248(3) 0.078(16) Uiso 1 1 d . . . . .
H91A H 0.6610 0.2449 -0.2089 0.094 Uiso 1 1 calc R U . . .
C92 C 0.745(2) 0.284(2) -0.250(2) 0.049(12) Uiso 1 1 d . . . . .
C93 C 0.982(2) 0.153(2) -0.2406(19) 0.040(11) Uiso 1 1 d . . . . .
C94 C 1.041(2) 0.143(2) -0.277(2) 0.040(11) Uiso 1 1 d . . . . .
H94A H 1.0616 0.1803 -0.3102 0.048 Uiso 1 1 calc R U . . .
C95 C 1.080(3) 0.082(2) -0.275(2) 0.065(14) Uiso 1 1 d . . . . .
H95A H 1.1241 0.0791 -0.3038 0.078 Uiso 1 1 calc R U . . .
C96 C 1.052(2) 0.032(2) -0.232(2) 0.051(12) Uiso 1 1 d . . . . .
H96A H 1.0740 -0.0095 -0.2310 0.061 Uiso 1 1 calc R U . . .
C97 C 0.991(2) 0.037(2) -0.188(2) 0.042(11) Uiso 1 1 d . . . . .
H97A H 0.9701 -0.0009 -0.1541 0.050 Uiso 1 1 calc R U . . .
C98 C 0.959(2) 0.100(2) -0.195(2) 0.042(11) Uiso 1 1 d . . . . .
C99 C 0.889(2) 0.098(2) -0.141(2) 0.049(12) Uiso 1 1 d . . . . .
C100 C 0.8607(18) 0.0586(19) -0.0896(18) 0.032(10) Uiso 1 1 d . . . . .
H10A H 0.8785 0.0168 -0.0690 0.038 Uiso 1 1 calc R U . . .
C101 C 0.801(2) 0.086(2) -0.068(2) 0.049(12) Uiso 1 1 d . . . . .
C102 C 0.746(2) 0.066(2) -0.001(2) 0.043(11) Uiso 1 1 d . . . . .
C103 C 0.746(2) 0.009(2) 0.036(2) 0.043(11) Uiso 1 1 d . . . . .
H10B H 0.7809 -0.0225 0.0232 0.052 Uiso 1 1 calc R U . . .
C104 C 0.699(2) -0.011(2) 0.095(2) 0.063(13) Uiso 1 1 d . . . . .
H10C H 0.7008 -0.0528 0.1261 0.075 Uiso 1 1 calc R U . . .
C105 C 0.647(2) 0.039(2) 0.102(2) 0.045(11) Uiso 1 1 d . . . . .
H10D H 0.6080 0.0295 0.1388 0.054 Uiso 1 1 calc R U . . .
C106 C 0.651(2) 0.099(2) 0.061(2) 0.043(11) Uiso 1 1 d . . . . .
C107 C 0.598(3) 0.147(2) 0.083(2) 0.063(14) Uiso 1 1 d . . . . .
C108 C 0.610(2) 0.208(2) 0.063(2) 0.044(11) Uiso 1 1 d . . . . .
H10E H 0.6497 0.2287 0.0327 0.053 Uiso 1 1 calc R U . . .
C109 C 0.5505(19) 0.2335(19) 0.0976(19) 0.036(10) Uiso 1 1 d . . . . .
C110 C 0.536(3) 0.303(3) 0.100(3) 0.074(15) Uiso 1 1 d . . . . .
C111 C 0.563(3) 0.347(3) 0.049(3) 0.092(18) Uiso 1 1 d . . . . .
H11B H 0.5947 0.3336 0.0160 0.110 Uiso 1 1 calc R U . . .
C112 C 0.548(4) 0.420(4) 0.036(4) 0.15(3) Uiso 1 1 d . . . . .
H11C H 0.5581 0.4546 -0.0029 0.178 Uiso 1 1 calc R U . . .
C113 C 0.513(3) 0.423(3) 0.104(3) 0.093(18) Uiso 1 1 d . . . . .
H11D H 0.5129 0.4610 0.1103 0.111 Uiso 1 1 calc R U . . .
C114 C 0.483(4) 0.373(4) 0.149(4) 0.12(2) Uiso 1 1 d . . . . .
H11E H 0.4504 0.3843 0.1837 0.147 Uiso 1 1 calc R U . . .
C115 C 0.489(3) 0.309(3) 0.160(3) 0.071(15) Uiso 1 1 d . . . . .
C116 C 0.481(2) 0.160(2) 0.397(2) 0.046(11) Uiso 1 1 d . . . . .
C117 C 0.470(2) 0.102(2) 0.403(2) 0.050(12) Uiso 1 1 d . . . . .
H11F H 0.4303 0.1002 0.3982 0.060 Uiso 1 1 calc R U . . .
C118 C 0.508(2) 0.048(2) 0.414(2) 0.055(12) Uiso 1 1 d . . . . .
H11G H 0.4980 0.0102 0.4131 0.065 Uiso 1 1 calc R U . . .
C119 C 0.565(2) 0.047(2) 0.428(2) 0.051(12) Uiso 1 1 d . . . . .
H11H H 0.5908 0.0073 0.4420 0.062 Uiso 1 1 calc R U . . .
C120 C 0.579(2) 0.1067(19) 0.4186(19) 0.042(11) Uiso 1 1 d . . . . .
H12B H 0.6201 0.1109 0.4197 0.050 Uiso 1 1 calc R U . . .
C121 C 0.5365(19) 0.1600(18) 0.4080(18) 0.034(10) Uiso 1 1 d . . . . .
C122 C 0.562(2) 0.219(2) 0.405(2) 0.058(13) Uiso 1 1 d . . . . .
C123 C 0.624(2) 0.234(2) 0.388(2) 0.052(12) Uiso 1 1 d . . . . .
H12C H 0.6637 0.2045 0.3822 0.063 Uiso 1 1 calc R U . . .
C124 C 0.622(2) 0.302(2) 0.380(2) 0.048(12) Uiso 1 1 d . . . . .
C125 C 0.6743(18) 0.3424(17) 0.3559(17) 0.026(9) Uiso 1 1 d . . . . .
C126 C 0.665(2) 0.4064(19) 0.3331(18) 0.039(10) Uiso 1 1 d . . . . .
H12D H 0.6228 0.4258 0.3289 0.047 Uiso 1 1 calc R U . . .
C127 C 0.709(2) 0.442(2) 0.317(2) 0.063(13) Uiso 1 1 d . . . . .
H12E H 0.7005 0.4878 0.3014 0.075 Uiso 1 1 calc R U . . .
C128 C 0.771(2) 0.416(2) 0.322(2) 0.054(12) Uiso 1 1 d . . . . .
H12F H 0.8047 0.4426 0.3099 0.065 Uiso 1 1 calc R U . . .
C129 C 0.7800(18) 0.3510(18) 0.3431(17) 0.030(9) Uiso 1 1 d . . . . .
C130 C 0.843(2) 0.3196(19) 0.3463(19) 0.038(10) Uiso 1 1 d . . . . .
C131 C 0.904(2) 0.338(2) 0.326(2) 0.051(12) Uiso 1 1 d . . . . .
H13B H 0.9169 0.3811 0.3008 0.062 Uiso 1 1 calc R U . . .
C132 C 0.943(2) 0.287(2) 0.345(2) 0.061(13) Uiso 1 1 d . . . . .
C133 C 1.018(2) 0.277(2) 0.342(2) 0.055(12) Uiso 1 1 d . . . . .
C134 C 1.044(2) 0.329(2) 0.326(2) 0.057(13) Uiso 1 1 d . . . . .
H13C H 1.0191 0.3695 0.3128 0.068 Uiso 1 1 calc R U . . .
C135 C 1.104(3) 0.330(3) 0.326(3) 0.089(18) Uiso 1 1 d . . . . .
H13D H 1.1248 0.3691 0.3133 0.107 Uiso 1 1 calc R U . . .
C136 C 1.131(3) 0.271(3) 0.346(2) 0.073(15) Uiso 1 1 d . . . . .
H13E H 1.1743 0.2693 0.3459 0.088 Uiso 1 1 calc R U . . .
C137 C 1.1093(19) 0.2140(19) 0.3662(17) 0.032(10) Uiso 1 1 d . . . . .
H13F H 1.1340 0.1745 0.3820 0.038 Uiso 1 1 calc R U . . .
C138 C 1.050(3) 0.215(3) 0.363(3) 0.077(16) Uiso 1 1 d . . . . .
C139 C 0.511(2) 0.195(2) 0.6145(19) 0.041(11) Uiso 1 1 d . . . . .
C140 C 0.450(3) 0.200(3) 0.659(2) 0.071(15) Uiso 1 1 d . . . . .
H14A H 0.4291 0.2422 0.6607 0.085 Uiso 1 1 calc R U . . .
C141 C 0.419(2) 0.146(2) 0.701(2) 0.055(12) Uiso 1 1 d . . . . .
H14B H 0.3794 0.1479 0.7361 0.066 Uiso 1 1 calc R U . . .
C142 C 0.443(2) 0.086(2) 0.694(2) 0.058(13) Uiso 1 1 d . . . . .
H14C H 0.4189 0.0485 0.7206 0.069 Uiso 1 1 calc R U . . .
C143 C 0.502(2) 0.084(2) 0.649(2) 0.047(11) Uiso 1 1 d . . . . .
H14D H 0.5187 0.0421 0.6449 0.056 Uiso 1 1 calc R U . . .
C144 C 0.539(2) 0.133(2) 0.609(2) 0.043(11) Uiso 1 1 d . . . . .
C145 C 0.600(3) 0.125(2) 0.561(2) 0.065(14) Uiso 1 1 d . . . . .
C146 C 0.629(2) 0.071(2) 0.544(2) 0.048(11) Uiso 1 1 d . . . . .
H14E H 0.6127 0.0296 0.5597 0.057 Uiso 1 1 calc R U . . .
C147 C 0.687(2) 0.094(2) 0.500(2) 0.053(12) Uiso 1 1 d . . . . .
C148 C 0.7436(19) 0.0678(18) 0.4540(18) 0.034(10) Uiso 1 1 d . . . . .
C149 C 0.749(2) 0.0050(19) 0.4575(19) 0.037(10) Uiso 1 1 d . . . . .
H14F H 0.7139 -0.0226 0.4884 0.045 Uiso 1 1 calc R U . . .
C150 C 0.800(2) -0.018(2) 0.419(2) 0.061(13) Uiso 1 1 d . . . . .
H15A H 0.8056 -0.0634 0.4257 0.074 Uiso 1 1 calc R U . . .
C151 C 0.848(2) 0.025(2) 0.369(2) 0.052(12) Uiso 1 1 d . . . . .
H15B H 0.8846 0.0107 0.3378 0.063 Uiso 1 1 calc R U . . .
C152 C 0.839(2) 0.086(2) 0.3674(19) 0.041(11) Uiso 1 1 d . . . . .
C153 C 0.880(2) 0.1358(19) 0.3145(19) 0.038(10) Uiso 1 1 d . . . . .
C154 C 0.859(2) 0.195(2) 0.288(2) 0.054(12) Uiso 1 1 d . . . . .
H15C H 0.8161 0.2154 0.3047 0.065 Uiso 1 1 calc R U . . .
C155 C 0.910(2) 0.223(2) 0.232(2) 0.045(11) Uiso 1 1 d . . . . .
C156 C 0.9100(16) 0.2888(14) 0.1823(13) 0.037(10) Uiso 1 1 d D . . . .
C157 C 0.8627(19) 0.3352(16) 0.1996(14) 0.064(14) Uiso 1 1 d D . . . .
H15D H 0.8332 0.3255 0.2418 0.077 Uiso 1 1 calc R U . . .
C158 C 0.858(2) 0.3951(16) 0.1565(16) 0.081(16) Uiso 1 1 d D . . . .
H15E H 0.8233 0.4269 0.1683 0.097 Uiso 1 1 calc R U . . .
C159 C 0.9015(18) 0.4099(15) 0.0970(15) 0.052(12) Uiso 1 1 d D . . . .
H15F H 0.9001 0.4530 0.0675 0.063 Uiso 1 1 calc R U . . .
C160 C 0.9473(19) 0.3631(16) 0.0794(14) 0.067(14) Uiso 1 1 d D . . . .
H16B H 0.9755 0.3722 0.0368 0.081 Uiso 1 1 calc R U . . .
C161 C 0.9529(17) 0.3032(14) 0.1225(14) 0.047(11) Uiso 1 1 d D . . . .
C162 C 0.9916(18) 0.1482(18) -0.0065(17) 0.029(9) Uiso 1 1 d . . . . .
C163 C 1.0060(17) 0.0882(16) 0.0354(16) 0.023(9) Uiso 1 1 d . . . . .
H16C H 1.0412 0.0839 0.0495 0.028 Uiso 1 1 calc R U . . .
C164 C 0.973(2) 0.039(2) 0.055(2) 0.045(11) Uiso 1 1 d . . . . .
H16D H 0.9905 -0.0017 0.0777 0.054 Uiso 1 1 calc R U . . .
C165 C 0.919(2) 0.041(2) 0.047(2) 0.049(12) Uiso 1 1 d . . . . .
H16E H 0.8909 0.0050 0.0690 0.059 Uiso 1 1 calc R U . . .
C166 C 0.903(2) 0.1013(19) 0.0014(19) 0.041(11) Uiso 1 1 d . . . . .
H16F H 0.8690 0.1037 -0.0130 0.050 Uiso 1 1 calc R U . . .
C167 C 0.934(2) 0.149(2) -0.018(2) 0.052(12) Uiso 1 1 d . . . . .
C168 C 0.9149(19) 0.2116(18) -0.0657(18) 0.035(10) Uiso 1 1 d . . . . .
C169 C 0.8509(18) 0.2342(17) -0.0717(17) 0.027(9) Uiso 1 1 d . . . . .
H16G H 0.8102 0.2128 -0.0482 0.032 Uiso 1 1 calc R U . . .
C170 C 0.8607(19) 0.2898(18) -0.1160(18) 0.033(10) Uiso 1 1 d . . . . .
C171 C 0.803(2) 0.3324(19) -0.1262(19) 0.037(10) Uiso 1 1 d . . . . .
C172 C 0.815(2) 0.401(2) -0.158(2) 0.053(12) Uiso 1 1 d . . . . .
H17A H 0.8575 0.4157 -0.1714 0.063 Uiso 1 1 calc R U . . .
C173 C 0.762(2) 0.443(2) -0.168(2) 0.062(13) Uiso 1 1 d . . . . .
H17B H 0.7667 0.4887 -0.1886 0.075 Uiso 1 1 calc R U . . .
C174 C 0.697(2) 0.418(2) -0.147(2) 0.060(13) Uiso 1 1 d . . . . .
H17C H 0.6578 0.4466 -0.1488 0.072 Uiso 1 1 calc R U . . .
C175 C 0.693(2) 0.353(2) -0.124(2) 0.049(12) Uiso 1 1 d . . . . .
C176 C 0.630(2) 0.322(2) -0.102(2) 0.056(13) Uiso 1 1 d . . . . .
C177 C 0.564(3) 0.341(3) -0.091(2) 0.070(15) Uiso 1 1 d . . . . .
H17D H 0.5458 0.3850 -0.0958 0.084 Uiso 1 1 calc R U . . .
C178 C 0.531(2) 0.295(2) -0.075(2) 0.058(13) Uiso 1 1 d . . . . .
C179 C 0.461(2) 0.291(2) -0.060(2) 0.052(12) Uiso 1 1 d . . . . .
C180 C 0.420(2) 0.351(2) -0.078(2) 0.049(12) Uiso 1 1 d . . . . .
H18A H 0.4376 0.3921 -0.0963 0.059 Uiso 1 1 calc R U . . .
C181 C 0.355(3) 0.346(3) -0.068(3) 0.075(15) Uiso 1 1 d . . . . .
H18B H 0.3275 0.3838 -0.0804 0.090 Uiso 1 1 calc R U . . .
C182 C 0.332(3) 0.289(3) -0.042(3) 0.088(17) Uiso 1 1 d . . . . .
H18C H 0.2866 0.2873 -0.0370 0.106 Uiso 1 1 calc R U . . .
C183 C 0.368(2) 0.229(2) -0.021(2) 0.053(12) Uiso 1 1 d . . . . .
H18D H 0.3489 0.1880 -0.0015 0.063 Uiso 1 1 calc R U . . .
C184 C 0.432(2) 0.232(2) -0.030(2) 0.052(12) Uiso 1 1 d . . . . .
C185 C 0.295(3) 0.263(2) 0.207(3) 0.065(14) Uiso 1 1 d . . . . .
H18E H 0.2854 0.2423 0.2501 0.078 Uiso 1 1 calc R U . . .
C186 C 0.240(3) 0.301(2) 0.193(2) 0.064(14) Uiso 1 1 d . . . . .
H18F H 0.1948 0.3006 0.2211 0.076 Uiso 1 1 calc R U . . .
C187 C 0.264(3) 0.341(2) 0.126(2) 0.071(15) Uiso 1 1 d . . . . .
H18G H 0.2326 0.3719 0.1097 0.085 Uiso 1 1 calc R U . . .
C188 C 0.330(3) 0.337(3) 0.086(3) 0.092(18) Uiso 1 1 d . . . . .
H18H H 0.3437 0.3641 0.0431 0.111 Uiso 1 1 calc R U . . .
C189 C 0.377(3) 0.288(3) 0.113(3) 0.078(16) Uiso 1 1 d . . . . .
H18I H 0.4220 0.2832 0.0865 0.093 Uiso 1 1 calc R U . . .
C190 C 0.566(3) 0.330(3) 0.252(3) 0.075(15) Uiso 1 1 d . . . . .
H19B H 0.5317 0.3633 0.2597 0.091 Uiso 1 1 calc R U . . .
C191 C 0.630(3) 0.341(3) 0.233(3) 0.077(16) Uiso 1 1 d . . . . .
H19C H 0.6422 0.3828 0.2259 0.092 Uiso 1 1 calc R U . . .
C192 C 0.680(3) 0.288(3) 0.225(3) 0.084(17) Uiso 1 1 d . . . . .
H19D H 0.7250 0.2934 0.2175 0.101 Uiso 1 1 calc R U . . .
C193 C 0.669(3) 0.241(3) 0.227(2) 0.064(14) Uiso 1 1 d . . . . .
H19E H 0.7042 0.2091 0.2169 0.076 Uiso 1 1 calc R U . . .
C194 C 0.604(3) 0.231(2) 0.243(2) 0.065(14) Uiso 1 1 d . . . . .
H19F H 0.5961 0.1914 0.2430 0.078 Uiso 1 1 calc R U . . .
C195 C 0.297(3) 0.266(3) 0.497(3) 0.070(15) Uiso 1 1 d . . . . .
H19G H 0.2861 0.3026 0.4649 0.084 Uiso 1 1 calc R U . . .
C196 C 0.243(4) 0.238(3) 0.550(3) 0.11(2) Uiso 1 1 d . . . . .
H19H H 0.1963 0.2510 0.5564 0.134 Uiso 1 1 calc R U . . .
C197 C 0.266(4) 0.190(3) 0.591(3) 0.10(2) Uiso 1 1 d . . . . .
H19I H 0.2356 0.1655 0.6301 0.124 Uiso 1 1 calc R U . . .
C198 C 0.334(4) 0.176(3) 0.579(3) 0.11(2) Uiso 1 1 d . . . . .
H19J H 0.3478 0.1428 0.6108 0.133 Uiso 1 1 calc R U . . .
C199 C 0.383(3) 0.208(3) 0.523(3) 0.079(16) Uiso 1 1 d . . . . .
H19K H 0.4300 0.1996 0.5142 0.095 Uiso 1 1 calc R U . . .
C200 C 1.176(2) 0.2162(19) 0.126(2) 0.041(11) Uiso 1 1 d . . . . .
H20B H 1.1853 0.2370 0.0825 0.050 Uiso 1 1 calc R U . . .
C201 C 1.235(2) 0.182(2) 0.143(2) 0.051(12) Uiso 1 1 d . . . . .
H20C H 1.2781 0.1804 0.1110 0.061 Uiso 1 1 calc R U . . .
C202 C 1.228(2) 0.154(2) 0.201(2) 0.059(13) Uiso 1 1 d . . . . .
H20D H 1.2624 0.1289 0.2163 0.071 Uiso 1 1 calc R U . . .
C203 C 1.164(3) 0.165(3) 0.237(3) 0.087(17) Uiso 1 1 d . . . . .
H20E H 1.1534 0.1494 0.2809 0.104 Uiso 1 1 calc R U . . .
C204 C 1.114(3) 0.196(2) 0.217(2) 0.061(13) Uiso 1 1 d . . . . .
H20F H 1.0710 0.2000 0.2481 0.074 Uiso 1 1 calc R U . . .
C205 C 0.895(2) 0.320(2) 0.002(2) 0.044(11) Uiso 1 1 d . . . . .
H20G H 0.9286 0.3495 -0.0284 0.052 Uiso 1 1 calc R U . . .
C206 C 0.833(2) 0.333(2) 0.006(2) 0.057(13) Uiso 1 1 d . . . . .
H20H H 0.8226 0.3737 -0.0221 0.069 Uiso 1 1 calc R U . . .
C207 C 0.786(4) 0.298(3) 0.043(3) 0.11(2) Uiso 1 1 d . . . . .
H20I H 0.7413 0.3124 0.0436 0.136 Uiso 1 1 calc R U . . .
C208 C 0.801(3) 0.236(3) 0.085(3) 0.083(16) Uiso 1 1 d . . . . .
H20J H 0.7680 0.2050 0.1144 0.099 Uiso 1 1 calc R U . . .
C209 C 0.870(2) 0.224(2) 0.080(2) 0.061(13) Uiso 1 1 d . . . . .
H20K H 0.8845 0.1852 0.1071 0.073 Uiso 1 1 calc R U . . .
C210 C 1.100(3) 0.166(3) -0.158(2) 0.073(15) Uiso 1 1 d . . . . .
H21B H 1.0541 0.1582 -0.1415 0.087 Uiso 1 1 calc R U . . .
C211 C 1.146(3) 0.125(3) -0.184(3) 0.078(16) Uiso 1 1 d . . . . .
H21C H 1.1343 0.0867 -0.1833 0.094 Uiso 1 1 calc R U . . .
C212 C 1.214(3) 0.142(3) -0.213(3) 0.10(2) Uiso 1 1 d . . . . .
H21D H 1.2493 0.1158 -0.2318 0.122 Uiso 1 1 calc R U . . .
C213 C 1.224(4) 0.195(3) -0.211(3) 0.11(2) Uiso 1 1 d . . . . .
H21E H 1.2698 0.2062 -0.2310 0.135 Uiso 1 1 calc R U . . .
C214 C 1.177(2) 0.237(2) -0.185(2) 0.064(14) Uiso 1 1 d . . . . .
H21F H 1.1877 0.2770 -0.1882 0.076 Uiso 1 1 calc R U . . .
N1S N 0.173(3) 0.382(3) 0.607(4) 0.186(16) Uiso 1 1 d G U . . .
C1S C 0.215(4) 0.412(3) 0.546(3) 0.186(16) Uiso 1 1 d G U . . .
H1S H 0.1966 0.4401 0.5152 0.223 Uiso 1 1 calc R U . . .
C2S C 0.285(4) 0.400(3) 0.529(3) 0.186(16) Uiso 1 1 d G U . . .
H2S H 0.3135 0.4208 0.4876 0.223 Uiso 1 1 calc R U . . .
C3S C 0.312(3) 0.359(3) 0.574(4) 0.186(16) Uiso 1 1 d G U . . .
H3S H 0.3591 0.3512 0.5627 0.223 Uiso 1 1 calc R U . . .
C4S C 0.269(4) 0.329(3) 0.635(3) 0.186(16) Uiso 1 1 d G U . . .
H4S H 0.2878 0.3009 0.6656 0.223 Uiso 1 1 calc R U . . .
C5S C 0.200(4) 0.341(3) 0.651(2) 0.186(16) Uiso 1 1 d G U . . .
H5S H 0.1708 0.3202 0.6932 0.223 Uiso 1 1 calc R U . . .
N2S N 0.079(3) 0.275(3) 0.498(3) 0.169(14) Uiso 1 1 d G U . . .
C6S C 0.109(3) 0.335(3) 0.467(2) 0.169(14) Uiso 1 1 d G U . . .
H6S H 0.1381 0.3459 0.4244 0.203 Uiso 1 1 calc R U . . .
C7S C 0.095(3) 0.378(2) 0.498(3) 0.169(14) Uiso 1 1 d G U . . .
H7S H 0.1152 0.4181 0.4762 0.203 Uiso 1 1 calc R U . . .
C8S C 0.052(3) 0.361(3) 0.559(3) 0.169(14) Uiso 1 1 d G U . . .
H8S H 0.0424 0.3905 0.5805 0.203 Uiso 1 1 calc R U . . .
C9S C 0.022(3) 0.302(3) 0.591(2) 0.169(14) Uiso 1 1 d G U . . .
H9S H -0.0074 0.2908 0.6330 0.203 Uiso 1 1 calc R U . . .
C10S C 0.036(3) 0.259(2) 0.560(3) 0.169(14) Uiso 1 1 d G U . . .
H10S H 0.0155 0.2186 0.5812 0.203 Uiso 1 1 calc R U . . .
N3S N 0.626(3) 0.689(4) 0.287(3) 0.194(17) Uiso 1 1 d G U . . .
C11S C 0.681(4) 0.643(3) 0.283(3) 0.194(17) Uiso 1 1 d G U . . .
H11S H 0.6922 0.6177 0.3190 0.233 Uiso 1 1 calc R U . . .
C12S C 0.719(3) 0.633(3) 0.227(4) 0.194(17) Uiso 1 1 d G U . . .
H12S H 0.7566 0.6015 0.2248 0.233 Uiso 1 1 calc R U . . .
C13S C 0.703(4) 0.670(4) 0.175(3) 0.194(17) Uiso 1 1 d G U . . .
H13S H 0.7287 0.6632 0.1366 0.233 Uiso 1 1 calc R U . . .
C14S C 0.648(4) 0.716(3) 0.178(3) 0.194(17) Uiso 1 1 d G U . . .
H14S H 0.6365 0.7412 0.1426 0.233 Uiso 1 1 calc R U . . .
C15S C 0.610(3) 0.726(3) 0.234(4) 0.194(17) Uiso 1 1 d G U . . .
H15S H 0.5721 0.7573 0.2368 0.233 Uiso 1 1 calc R U . . .
N4S N 0.670(2) 0.051(3) 0.277(3) 0.164(14) Uiso 1 1 d G U . . .
C16S C 0.685(3) 0.049(3) 0.218(3) 0.164(14) Uiso 1 1 d G U . . .
H16S H 0.6506 0.0449 0.2074 0.197 Uiso 1 1 calc R U . . .
C17S C 0.752(3) 0.053(3) 0.176(2) 0.164(14) Uiso 1 1 d G U . . .
H17S H 0.7621 0.0512 0.1365 0.197 Uiso 1 1 calc R U . . .
C18S C 0.802(2) 0.059(3) 0.192(3) 0.164(14) Uiso 1 1 d G U . . .
H18S H 0.8475 0.0613 0.1636 0.197 Uiso 1 1 calc R U . . .
C19S C 0.787(3) 0.061(3) 0.251(3) 0.164(14) Uiso 1 1 d G U . . .
H19S H 0.8215 0.0650 0.2616 0.197 Uiso 1 1 calc R U . . .
C20S C 0.721(3) 0.057(3) 0.293(2) 0.164(14) Uiso 1 1 d G U . . .
H20S H 0.7101 0.0587 0.3324 0.197 Uiso 1 1 calc R U . . .
N5S N 0.076(3) 0.525(2) 0.127(3) 0.149(12) Uiso 1 1 d G U . . .
C21S C 0.049(3) 0.524(2) 0.087(2) 0.149(12) Uiso 1 1 d G U . . .
H21S H 0.0369 0.5637 0.0585 0.179 Uiso 1 1 calc R U . . .
C22S C 0.040(3) 0.464(3) 0.088(3) 0.149(12) Uiso 1 1 d G U . . .
H22S H 0.0217 0.4634 0.0607 0.179 Uiso 1 1 calc R U . . .
C23S C 0.058(3) 0.406(2) 0.130(3) 0.149(12) Uiso 1 1 d G U . . .
H23S H 0.0516 0.3654 0.1305 0.179 Uiso 1 1 calc R U . . .
C24S C 0.085(3) 0.407(2) 0.170(2) 0.149(12) Uiso 1 1 d G U . . .
H24S H 0.0968 0.3677 0.1981 0.179 Uiso 1 1 calc R U . . .
C25S C 0.094(3) 0.467(3) 0.168(2) 0.149(12) Uiso 1 1 d G U . . .
H25S H 0.1121 0.4680 0.1959 0.179 Uiso 1 1 calc R U . . .
 
loop_
 _atom_site_aniso_label
 _atom_site_aniso_U_11
 _atom_site_aniso_U_22
 _atom_site_aniso_U_33
 _atom_site_aniso_U_23
 _atom_site_aniso_U_13
 _atom_site_aniso_U_12
Cu1 0.063(4) 0.060(4) 0.046(4) -0.037(3) -0.029(3) 0.022(3)
Cu2 0.075(4) 0.054(4) 0.044(4) -0.030(3) -0.029(3) 0.011(3)
Cu3 0.071(4) 0.067(4) 0.047(4) -0.042(3) -0.025(3) 0.015(3)
Cu4 0.068(4) 0.058(4) 0.058(4) -0.042(3) -0.027(3) 0.017(3)
Cu5 0.062(4) 0.060(4) 0.072(4) -0.051(4) -0.035(3) 0.028(3)
Cu6 0.073(4) 0.049(4) 0.060(4) -0.040(3) -0.034(3) 0.028(3)
Cu7 0.068(4) 0.053(4) 0.047(4) -0.036(3) -0.023(3) 0.017(3)
Cu8 0.069(4) 0.052(4) 0.043(4) -0.032(3) -0.026(3) 0.015(3)
Cu9 0.070(4) 0.047(3) 0.040(4) -0.026(3) -0.031(3) 0.017(3)
Cu10 0.072(4) 0.042(3) 0.025(3) -0.015(3) -0.024(3) 0.015(3)
Cu11 0.064(4) 0.041(3) 0.028(3) -0.019(3) -0.021(3) 0.019(3)
Cu12 0.064(4) 0.052(4) 0.059(4) -0.040(3) -0.033(3) 0.026(3)
Cu13 0.064(4) 0.044(3) 0.043(4) -0.019(3) -0.025(3) 0.009(3)
Cu14 0.082(5) 0.045(4) 0.055(4) -0.026(3) -0.033(3) 0.016(3)
Cu15 0.063(4) 0.049(4) 0.055(4) -0.034(3) -0.029(3) 0.023(3)
Cu16 0.062(4) 0.048(4) 0.039(3) -0.023(3) -0.028(3) 0.025(3)
 
_geom_special_details
;
 All esds (except the esd in the dihedral angle between two l.s. planes)
 are estimated using the full covariance matrix.  The cell esds are taken
 into account individually in the estimation of esds in distances, angles
 and torsion angles; correlations between esds in cell parameters are only
 used when they are defined by crystal symmetry.  An approximate (isotropic)
 treatment of cell esds is used for estimating esds involving l.s. planes.
;
 
loop_
 _geom_bond_atom_site_label_1
 _geom_bond_atom_site_label_2
 _geom_bond_distance
 _geom_bond_site_symmetry_2
 _geom_bond_publ_flag
Cu1 N40 1.75(3) . ?
Cu1 O16 1.84(3) . ?
Cu1 N1 1.87(3) . ?
Cu1 O1 1.92(3) . ?
Cu2 N24 1.90(3) . ?
Cu2 N3 1.92(4) . ?
Cu2 N4 1.94(3) . ?
Cu2 N2 1.97(3) . ?
Cu2 O17 2.24(3) . ?
Cu3 O10 1.84(3) . ?
Cu3 N5 1.91(3) . ?
Cu3 O2 1.93(3) . ?
Cu3 N25 2.03(4) . ?
Cu3 N41 2.21(4) . ?
Cu3 Cu4 2.971(7) . ?
Cu4 O2 1.86(3) . ?
Cu4 O11 1.89(3) . ?
Cu4 O10 1.91(3) . ?
Cu4 N42 1.91(4) . ?
Cu4 O3 2.06(3) . ?
Cu4 Cu5 3.000(7) . ?
Cu5 O11 1.89(3) . ?
Cu5 N6 1.90(4) . ?
Cu5 N26 1.93(3) . ?
Cu5 O3 1.94(3) . ?
Cu5 N43 2.22(4) . ?
Cu6 N7 1.85(3) . ?
Cu6 N8 1.89(3) . ?
Cu6 N27 1.92(3) . ?
Cu6 N9 2.00(3) . ?
Cu6 O19 2.03(3) . ?
Cu7 N31 1.84(3) . ?
Cu7 O13 1.84(3) . ?
Cu7 N10 1.85(3) . ?
Cu7 O4 1.97(3) . ?
Cu8 N32 1.75(4) . ?
Cu8 N29 1.83(4) . ?
Cu8 O4 2.05(3) . ?
Cu8 O5 2.08(3) . ?
Cu9 N30 1.77(3) . ?
Cu9 O12 1.77(3) . ?
Cu9 N11 1.84(3) . ?
Cu9 O5 1.94(3) . ?
Cu10 N12 1.91(4) . ?
Cu10 N34 1.91(3) . ?
Cu10 N13 1.97(4) . ?
Cu10 N14 1.97(4) . ?
Cu11 O14 1.89(3) . ?
Cu11 N15 1.89(3) . ?
Cu11 O6 1.94(3) . ?
Cu11 N35 2.02(3) . ?
Cu11 N44 2.32(3) . ?
Cu11 Cu12 2.949(7) . ?
Cu12 O6 1.85(3) . ?
Cu12 O14 1.87(2) . ?
Cu12 O15 1.92(2) . ?
Cu12 O7 2.02(3) . ?
Cu12 N45 2.06(4) . ?
Cu12 Cu13 2.987(8) . ?
Cu13 N16 1.82(4) . ?
Cu13 O15 1.92(3) . ?
Cu13 O7 1.96(3) . ?
Cu13 N36 1.97(3) . ?
Cu13 N46 2.28(4) . ?
Cu14 N18 1.77(4) . ?
Cu14 N37 1.78(5) . ?
Cu14 N17 1.91(3) . ?
Cu14 N19 2.02(3) . ?
Cu14 O18 2.27(3) . ?
Cu15 N21 1.71(3) . ?
Cu15 N20 1.87(4) . ?
Cu15 O9 1.87(3) . ?
Cu15 O8 1.88(3) . ?
Cu16 N39 1.86(4) . ?
Cu16 N22 1.89(4) . ?
Cu16 O1 1.95(3) . ?
Cu16 O8 2.14(3) . ?
O1 C1 1.44(5) . ?
O2 C23 1.40(5) . ?
O3 C24 1.39(4) . ?
O4 C46 1.32(4) . ?
O5 C47 1.32(4) . ?
O6 C69 1.35(5) . ?
O7 C70 1.36(5) . ?
O8 C92 1.38(5) . ?
O9 C93 1.30(4) . ?
O10 C115 1.18(6) . ?
O11 C116 1.39(5) . ?
O12 C138 1.39(6) . ?
O13 C139 1.36(5) . ?
O14 C161 1.39(3) . ?
O15 C162 1.27(4) . ?
O16 C184 1.34(5) . ?
N1 N2 1.32(4) . ?
N1 C7 1.43(4) . ?
N2 C9 1.25(4) . ?
N3 C14 1.36(5) . ?
N3 C10 1.42(5) . ?
N4 C15 1.23(5) . ?
N4 N5 1.37(4) . ?
N5 C17 1.31(5) . ?
N6 N7 1.35(4) . ?
N6 C30 1.37(5) . ?
N7 C32 1.42(5) . ?
N8 C37 1.28(5) . ?
N8 C33 1.39(5) . ?
N9 C38 1.35(5) . ?
N9 N10 1.37(4) . ?
N10 C40 1.32(5) . ?
N11 C53 1.34(5) . ?
N11 N12 1.35(4) . ?
N12 C55 1.37(5) . ?
N13 C56 1.29(5) . ?
N13 C60 1.32(5) . ?
N14 N15 1.23(4) . ?
N14 C61 1.53(5) . ?
N15 C63 1.36(5) . ?
N16 C76 1.32(5) . ?
N16 N17 1.40(4) . ?
N17 C78 1.31(5) . ?
N18 C79 1.33(6) . ?
N18 C83 1.43(5) . ?
N19 C84 1.28(5) . ?
N19 N20 1.35(5) . ?
N20 C86 1.43(6) . ?
N21 N22 1.393(19) . ?
N21 C99 1.45(5) . ?
N22 C101 1.26(5) . ?
N23 C106 1.24(5) . ?
N23 C102 1.33(5) . ?
N24 C107 1.28(5) . ?
N24 N25 1.398(19) . ?
N25 C109 1.24(5) . ?
N26 N27 1.36(4) . ?
N26 C122 1.44(5) . ?
N27 C124 1.42(5) . ?
N28 C125 1.26(4) . ?
N28 C129 1.30(4) . ?
N29 N30 1.38(4) . ?
N29 C130 1.45(5) . ?
N30 C132 1.36(5) . ?
N31 C145 1.32(6) . ?
N31 N32 1.45(5) . ?
N32 C147 1.42(5) . ?
N33 C148 1.32(5) . ?
N33 C152 1.34(5) . ?
N34 C153 1.30(5) . ?
N34 N35 1.37(4) . ?
N35 C155 1.41(5) . ?
N36 C168 1.34(5) . ?
N36 N37 1.37(5) . ?
N37 C170 1.36(5) . ?
N38 C171 1.33(5) . ?
N38 C175 1.41(5) . ?
N39 N40 1.36(4) . ?
N39 C176 1.37(5) . ?
N40 C178 1.38(5) . ?
N41 C185 1.29(6) . ?
N41 C189 1.35(6) . ?
N42 C190 1.34(6) . ?
N42 C194 1.41(6) . ?
N43 C199 1.22(6) . ?
N43 C195 1.25(5) . ?
N44 C200 1.20(5) . ?
N44 C204 1.33(5) . ?
N45 C209 1.21(5) . ?
N45 C205 1.30(5) . ?
N46 C210 1.29(6) . ?
N46 C214 1.33(6) . ?
C1 C2 1.33(6) . ?
C1 C6 1.40(6) . ?
C2 C3 1.42(5) . ?
C2 H2A 0.9500 . ?
C3 C4 1.28(6) . ?
C3 H3A 0.9500 . ?
C4 C5 1.43(6) . ?
C4 H4A 0.9500 . ?
C5 C6 1.52(6) . ?
C5 H5A 0.9500 . ?
C6 C7 1.38(6) . ?
C7 C8 1.25(5) . ?
C8 C9 1.42(5) . ?
C8 H8A 0.9500 . ?
C9 C10 1.44(6) . ?
C10 C11 1.34(5) . ?
C11 C12 1.32(6) . ?
C11 H11A 0.9500 . ?
C12 C13 1.39(6) . ?
C12 H12A 0.9500 . ?
C13 C14 1.21(5) . ?
C13 H13A 0.9500 . ?
C14 C15 1.45(5) . ?
C15 C16 1.40(6) . ?
C16 C17 1.31(5) . ?
C16 H16A 0.9500 . ?
C17 C18 1.42(5) . ?
C18 C23 1.26(5) . ?
C18 C19 1.45(6) . ?
C19 C20 1.29(6) . ?
C19 H19A 0.9500 . ?
C20 C21 1.33(6) . ?
C20 H20A 0.9500 . ?
C21 C22 1.27(6) . ?
C21 H21A 0.9500 . ?
C22 C23 1.52(6) . ?
C22 H22A 0.9500 . ?
C24 C25 1.30(5) . ?
C24 C29 1.40(5) . ?
C25 C26 1.37(5) . ?
C25 H25A 0.9500 . ?
C26 C27 1.46(6) . ?
C26 H26A 0.9500 . ?
C27 C28 1.30(6) . ?
C27 H27A 0.9500 . ?
C28 C29 1.34(6) . ?
C28 H28A 0.9500 . ?
C29 C30 1.48(6) . ?
C30 C31 1.34(6) . ?
C31 C32 1.35(6) . ?
C31 H31A 0.9500 . ?
C32 C33 1.50(6) . ?
C33 C34 1.39(5) . ?
C34 C35 1.29(5) . ?
C34 H34A 0.9500 . ?
C35 C36 1.40(6) . ?
C35 H35A 0.9500 . ?
C36 C37 1.39(6) . ?
C36 H36A 0.9500 . ?
C37 C38 1.41(6) . ?
C38 C39 1.33(5) . ?
C39 C40 1.35(6) . ?
C39 H39A 0.9500 . ?
C40 C41 1.49(6) . ?
C41 C42 1.39(6) . ?
C41 C46 1.40(5) . ?
C42 C43 1.33(6) . ?
C42 H42A 0.9500 . ?
C43 C44 1.32(6) . ?
C43 H43A 0.9500 . ?
C44 C45 1.32(6) . ?
C44 H44A 0.9500 . ?
C45 C46 1.29(5) . ?
C45 H45A 0.9500 . ?
C47 C48 1.36(5) . ?
C47 C52 1.40(5) . ?
C48 C49 1.34(6) . ?
C48 H48A 0.9500 . ?
C49 C50 1.30(5) . ?
C49 H49A 0.9500 . ?
C50 C51 1.29(6) . ?
C50 H50A 0.9500 . ?
C51 C52 1.39(6) . ?
C51 H51A 0.9500 . ?
C52 C53 1.46(6) . ?
C53 C54 1.44(5) . ?
C54 C55 1.31(5) . ?
C54 H54A 0.9500 . ?
C55 C56 1.53(5) . ?
C56 C57 1.36(6) . ?
C57 C58 1.35(6) . ?
C57 H57A 0.9500 . ?
C58 C59 1.36(6) . ?
C58 H58A 0.9500 . ?
C59 C60 1.31(5) . ?
C59 H59A 0.9500 . ?
C60 C61 1.30(5) . ?
C61 C62 1.43(6) . ?
C62 C63 1.41(5) . ?
C62 H62A 0.9500 . ?
C63 C64 1.42(5) . ?
C64 C69 1.31(5) . ?
C64 C65 1.44(5) . ?
C65 C66 1.31(5) . ?
C65 H65A 0.9500 . ?
C66 C67 1.34(5) . ?
C66 H66A 0.9500 . ?
C67 C68 1.34(5) . ?
C67 H67A 0.9500 . ?
C68 C69 1.45(6) . ?
C68 H68A 0.9500 . ?
C70 C71 1.32(6) . ?
C70 C75 1.38(6) . ?
C71 C72 1.23(6) . ?
C71 H71A 0.9500 . ?
C72 C73 1.27(6) . ?
C72 H72A 0.9500 . ?
C73 C74 1.48(7) . ?
C73 H73A 0.9500 . ?
C74 C75 1.45(7) . ?
C74 H74A 0.9500 . ?
C75 C76 1.53(6) . ?
C76 C77 1.36(6) . ?
C77 C78 1.38(6) . ?
C77 H77A 0.9500 . ?
C78 C79 1.39(6) . ?
C79 C80 1.38(7) . ?
C80 C81 1.42(6) . ?
C80 H80A 0.9500 . ?
C81 C82 1.39(6) . ?
C81 H81A 0.9500 . ?
C82 C83 1.43(7) . ?
C82 H82A 0.9500 . ?
C83 C84 1.41(6) . ?
C84 C85 1.30(5) . ?
C85 C86 1.28(6) . ?
C85 H85A 0.9500 . ?
C86 C87 1.51(6) . ?
C87 C92 1.22(6) . ?
C87 C88 1.46(6) . ?
C88 C89 1.30(6) . ?
C88 H88A 0.9500 . ?
C89 C90 1.32(7) . ?
C89 H89A 0.9500 . ?
C90 C91 1.36(7) . ?
C90 H90A 0.9500 . ?
C91 C92 1.29(6) . ?
C91 H91A 0.9500 . ?
C93 C94 1.27(5) . ?
C93 C98 1.28(5) . ?
C94 C95 1.42(6) . ?
C94 H94A 0.9500 . ?
C95 C96 1.24(6) . ?
C95 H95A 0.9500 . ?
C96 C97 1.35(6) . ?
C96 H96A 0.9500 . ?
C97 C98 1.40(5) . ?
C97 H97A 0.9500 . ?
C98 C99 1.56(6) . ?
C99 C100 1.22(5) . ?
C99 C101 2.02(6) . ?
C100 C101 1.31(5) . ?
C100 H10A 0.9500 . ?
C101 C102 1.55(6) . ?
C102 C103 1.24(5) . ?
C103 C104 1.36(6) . ?
C103 H10B 0.9500 . ?
C104 C105 1.41(6) . ?
C104 H10C 0.9500 . ?
C105 C106 1.32(5) . ?
C105 H10D 0.9500 . ?
C106 C107 1.49(6) . ?
C107 C108 1.30(6) . ?
C108 C109 1.38(5) . ?
C108 H10E 0.9500 . ?
C109 C110 1.53(6) . ?
C110 C111 1.25(7) . ?
C110 C115 1.48(7) . ?
C111 C112 1.51(9) . ?
C111 H11B 0.9500 . ?
C112 C113 1.58(10) . ?
C112 H11C 0.9500 . ?
C113 C114 1.28(9) . ?
C113 H11D 0.9500 . ?
C114 C115 1.35(8) . ?
C114 H11E 0.9500 . ?
C116 C117 1.33(5) . ?
C116 C121 1.34(5) . ?
C117 C118 1.30(5) . ?
C117 H11F 0.9500 . ?
C118 C119 1.42(6) . ?
C118 H11G 0.9500 . ?
C119 C120 1.36(5) . ?
C119 H11H 0.9500 . ?
C120 C121 1.34(5) . ?
C120 H12B 0.9500 . ?
C121 C122 1.53(6) . ?
C122 C123 1.33(6) . ?
C123 C124 1.47(6) . ?
C123 H12C 0.9500 . ?
C124 C125 1.39(5) . ?
C125 C126 1.31(5) . ?
C126 C127 1.23(5) . ?
C126 H12D 0.9500 . ?
C127 C128 1.37(6) . ?
C127 H12E 0.9500 . ?
C128 C129 1.32(5) . ?
C128 H12F 0.9500 . ?
C129 C130 1.42(5) . ?
C130 C131 1.30(5) . ?
C131 C132 1.31(6) . ?
C131 H13B 0.9500 . ?
C132 C133 1.59(6) . ?
C133 C134 1.25(6) . ?
C133 C138 1.41(6) . ?
C134 C135 1.33(7) . ?
C134 H13C 0.9500 . ?
C135 C136 1.30(7) . ?
C135 H13D 0.9500 . ?
C136 C137 1.29(6) . ?
C136 H13E 0.9500 . ?
C137 C138 1.32(6) . ?
C137 H13F 0.9500 . ?
C139 C140 1.36(6) . ?
C139 C144 1.42(5) . ?
C140 C141 1.35(6) . ?
C140 H14A 0.9500 . ?
C141 C142 1.37(6) . ?
C141 H14B 0.9500 . ?
C142 C143 1.32(6) . ?
C142 H14C 0.9500 . ?
C143 C144 1.32(6) . ?
C143 H14D 0.9500 . ?
C144 C145 1.42(6) . ?
C145 C146 1.38(6) . ?
C146 C147 1.33(6) . ?
C146 H14E 0.9500 . ?
C147 C148 1.49(6) . ?
C148 C149 1.36(5) . ?
C149 C150 1.31(6) . ?
C149 H14F 0.9500 . ?
C150 C151 1.41(6) . ?
C150 H15A 0.9500 . ?
C151 C152 1.35(5) . ?
C151 H15B 0.9500 . ?
C152 C153 1.45(6) . ?
C153 C154 1.29(5) . ?
C154 C155 1.39(6) . ?
C154 H15C 0.9500 . ?
C155 C156 1.49(5) . ?
C156 C161 1.35(2) . ?
C156 C157 1.36(2) . ?
C157 C158 1.35(2) . ?
C157 H15D 0.9500 . ?
C158 C159 1.35(2) . ?
C158 H15E 0.9500 . ?
C159 C160 1.35(2) . ?
C159 H15F 0.9500 . ?
C160 C161 1.36(2) . ?
C160 H16B 0.9500 . ?
C162 C163 1.39(5) . ?
C162 C167 1.41(5) . ?
C163 C164 1.26(5) . ?
C163 H16C 0.9500 . ?
C164 C165 1.30(5) . ?
C164 H16D 0.9500 . ?
C165 C166 1.45(6) . ?
C165 H16E 0.9500 . ?
C166 C167 1.21(5) . ?
C166 H16F 0.9500 . ?
C167 C168 1.54(6) . ?
C168 C169 1.43(5) . ?
C169 C170 1.28(5) . ?
C169 H16G 0.9500 . ?
C170 C171 1.45(5) . ?
C171 C172 1.44(6) . ?
C172 C173 1.36(6) . ?
C172 H17A 0.9500 . ?
C173 C174 1.46(6) . ?
C173 H17B 0.9500 . ?
C174 C175 1.34(6) . ?
C174 H17C 0.9500 . ?
C175 C176 1.48(6) . ?
C176 C177 1.35(6) . ?
C177 C178 1.25(6) . ?
C177 H17D 0.9500 . ?
C178 C179 1.43(6) . ?
C179 C184 1.36(6) . ?
C179 C180 1.45(6) . ?
C180 C181 1.35(6) . ?
C180 H18A 0.9500 . ?
C181 C182 1.29(7) . ?
C181 H18B 0.9500 . ?
C182 C183 1.42(7) . ?
C182 H18C 0.9500 . ?
C183 C184 1.33(6) . ?
C183 H18D 0.9500 . ?
C185 C186 1.39(6) . ?
C185 H18E 0.9500 . ?
C186 C187 1.47(7) . ?
C186 H18F 0.9500 . ?
C187 C188 1.38(7) . ?
C187 H18G 0.9500 . ?
C188 C189 1.47(7) . ?
C188 H18H 0.9500 . ?
C189 H18I 0.9500 . ?
C190 C191 1.34(7) . ?
C190 H19B 0.9500 . ?
C191 C192 1.44(7) . ?
C191 H19C 0.9500 . ?
C192 C193 1.13(6) . ?
C192 H19D 0.9500 . ?
C193 C194 1.35(6) . ?
C193 H19E 0.9500 . ?
C194 H19F 0.9500 . ?
C195 C196 1.39(8) . ?
C195 H19G 0.9500 . ?
C196 C197 1.33(8) . ?
C196 H19H 0.9500 . ?
C197 C198 1.36(8) . ?
C197 H19I 0.9500 . ?
C198 C199 1.39(8) . ?
C198 H19J 0.9500 . ?
C199 H19K 0.9500 . ?
C200 C201 1.48(6) . ?
C200 H20B 0.9500 . ?
C201 C202 1.31(6) . ?
C201 H20C 0.9500 . ?
C202 C203 1.35(7) . ?
C202 H20D 0.9500 . ?
C203 C204 1.32(6) . ?
C203 H20E 0.9500 . ?
C204 H20F 0.9500 . ?
C205 C206 1.30(5) . ?
C205 H20G 0.9500 . ?
C206 C207 1.23(8) . ?
C206 H20H 0.9500 . ?
C207 C208 1.44(8) . ?
C207 H20I 0.9500 . ?
C208 C209 1.44(7) . ?
C208 H20J 0.9500 . ?
C209 H20K 0.9500 . ?
C210 C211 1.35(7) . ?
C210 H21B 0.9500 . ?
C211 C212 1.41(8) . ?
C211 H21C 0.9500 . ?
C212 C213 1.28(8) . ?
C212 H21D 0.9500 . ?
C213 C214 1.38(7) . ?
C213 H21E 0.9500 . ?
C214 H21F 0.9500 . ?
N1S C1S 1.3900 . ?
N1S C5S 1.3900 . ?
C1S C2S 1.3900 . ?
C1S H1S 0.9500 . ?
C2S C3S 1.3900 . ?
C2S H2S 0.9500 . ?
C3S C4S 1.3900 . ?
C3S H3S 0.9500 . ?
C4S C5S 1.3900 . ?
C4S H4S 0.9500 . ?
C5S H5S 0.9500 . ?
N2S C6S 1.3900 . ?
N2S C10S 1.3900 . ?
C6S C7S 1.3900 . ?
C6S H6S 0.9500 . ?
C7S C8S 1.3900 . ?
C7S H7S 0.9500 . ?
C8S C9S 1.3900 . ?
C8S H8S 0.9500 . ?
C9S C10S 1.3900 . ?
C9S H9S 0.9500 . ?
C10S H10S 0.9500 . ?
N3S C11S 1.3900 . ?
N3S C15S 1.3900 . ?
C11S C12S 1.3900 . ?
C11S H11S 0.9500 . ?
C12S C13S 1.3900 . ?
C12S H12S 0.9500 . ?
C13S C14S 1.3900 . ?
C13S H13S 0.9500 . ?
C14S C15S 1.3900 . ?
C14S H14S 0.9500 . ?
C15S H15S 0.9500 . ?
N4S C16S 1.3900 . ?
N4S C20S 1.3900 . ?
C16S C17S 1.3900 . ?
C16S H16S 0.9500 . ?
C17S C18S 1.3900 . ?
C17S H17S 0.9500 . ?
C18S C19S 1.3900 . ?
C18S H18S 0.9500 . ?
C19S C20S 1.3900 . ?
C19S H19S 0.9500 . ?
C20S H20S 0.9500 . ?
N5S C21S 1.3900 . ?
N5S C25S 1.3900 . ?
C21S C22S 1.3900 . ?
C21S H21S 0.9500 . ?
C22S C23S 1.3900 . ?
C22S H22S 0.9500 . ?
C23S C24S 1.3900 . ?
C23S H23S 0.9500 . ?
C24S C25S 1.3900 . ?
C24S H24S 0.9500 . ?
C25S H25S 0.9500 . ?
 
loop_
 _geom_angle_atom_site_label_1
 _geom_angle_atom_site_label_2
 _geom_angle_atom_site_label_3
 _geom_angle
 _geom_angle_site_symmetry_1
 _geom_angle_site_symmetry_3
 _geom_angle_publ_flag
N40 Cu1 O16 90.3(15) . . ?
N40 Cu1 N1 164.0(14) . . ?
O16 Cu1 N1 96.9(15) . . ?
N40 Cu1 O1 86.3(13) . . ?
O16 Cu1 O1 159.8(13) . . ?
N1 Cu1 O1 91.6(12) . . ?
N24 Cu2 N3 149.8(14) . . ?
N24 Cu2 N4 97.9(13) . . ?
N3 Cu2 N4 77.8(15) . . ?
N24 Cu2 N2 106.9(13) . . ?
N3 Cu2 N2 78.2(15) . . ?
N4 Cu2 N2 154.7(14) . . ?
N24 Cu2 O17 96.1(12) . . ?
N3 Cu2 O17 113.7(13) . . ?
N4 Cu2 O17 90.2(12) . . ?
N2 Cu2 O17 92.2(12) . . ?
O10 Cu3 N5 156.0(14) . . ?
O10 Cu3 O2 71.1(13) . . ?
N5 Cu3 O2 87.4(13) . . ?
O10 Cu3 N25 89.8(14) . . ?
N5 Cu3 N25 107.1(13) . . ?
O2 Cu3 N25 154.5(13) . . ?
O10 Cu3 N41 92.5(14) . . ?
N5 Cu3 N41 101.7(14) . . ?
O2 Cu3 N41 99.8(14) . . ?
N25 Cu3 N41 97.7(15) . . ?
O10 Cu3 Cu4 38.4(10) . . ?
N5 Cu3 Cu4 117.7(10) . . ?
O2 Cu3 Cu4 37.4(8) . . ?
N25 Cu3 Cu4 118.1(10) . . ?
N41 Cu3 Cu4 111.7(10) . . ?
O2 Cu4 O11 101.3(13) . . ?
O2 Cu4 O10 71.2(13) . . ?
O11 Cu4 O10 169.0(13) . . ?
O2 Cu4 N42 151.0(15) . . ?
O11 Cu4 N42 90.8(16) . . ?
O10 Cu4 N42 92.5(16) . . ?
O2 Cu4 O3 110.2(12) . . ?
O11 Cu4 O3 73.9(13) . . ?
O10 Cu4 O3 115.9(13) . . ?
N42 Cu4 O3 98.3(15) . . ?
O2 Cu4 Cu3 39.1(9) . . ?
O11 Cu4 Cu3 132.9(9) . . ?
O10 Cu4 Cu3 36.9(10) . . ?
N42 Cu4 Cu3 115.5(13) . . ?
O3 Cu4 Cu3 133.0(9) . . ?
O2 Cu4 Cu5 121.9(9) . . ?
O11 Cu4 Cu5 37.6(9) . . ?
O10 Cu4 Cu5 153.4(10) . . ?
N42 Cu4 Cu5 83.3(13) . . ?
O3 Cu4 Cu5 39.8(9) . . ?
Cu3 Cu4 Cu5 160.9(3) . . ?
O11 Cu5 N6 164.8(14) . . ?
O11 Cu5 N26 91.2(13) . . ?
N6 Cu5 N26 101.2(14) . . ?
O11 Cu5 O3 76.9(13) . . ?
N6 Cu5 O3 88.0(14) . . ?
N26 Cu5 O3 137.6(14) . . ?
O11 Cu5 N43 91.1(13) . . ?
N6 Cu5 N43 94.7(15) . . ?
N26 Cu5 N43 102.6(15) . . ?
O3 Cu5 N43 118.0(14) . . ?
O11 Cu5 Cu4 37.6(9) . . ?
N6 Cu5 Cu4 128.5(11) . . ?
N26 Cu5 Cu4 107.1(10) . . ?
O3 Cu5 Cu4 43.0(9) . . ?
N43 Cu5 Cu4 119.0(9) . . ?
N7 Cu6 N8 81.1(14) . . ?
N7 Cu6 N27 95.2(14) . . ?
N8 Cu6 N27 144.5(15) . . ?
N7 Cu6 N9 157.4(14) . . ?
N8 Cu6 N9 76.4(13) . . ?
N27 Cu6 N9 104.6(14) . . ?
N7 Cu6 O19 92.2(14) . . ?
N8 Cu6 O19 115.7(13) . . ?
N27 Cu6 O19 99.6(14) . . ?
N9 Cu6 O19 95.1(13) . . ?
N31 Cu7 O13 88.4(15) . . ?
N31 Cu7 N10 162.2(15) . . ?
O13 Cu7 N10 100.0(14) . . ?
N31 Cu7 O4 89.6(13) . . ?
O13 Cu7 O4 159.6(13) . . ?
N10 Cu7 O4 87.8(13) . . ?
N32 Cu8 N29 174.1(17) . . ?
N32 Cu8 O4 87.1(14) . . ?
N29 Cu8 O4 94.1(13) . . ?
N32 Cu8 O5 99.9(14) . . ?
N29 Cu8 O5 85.4(13) . . ?
O4 Cu8 O5 105.4(10) . . ?
N30 Cu9 O12 91.6(14) . . ?
N30 Cu9 N11 162.8(13) . . ?
O12 Cu9 N11 98.1(12) . . ?
N30 Cu9 O5 90.3(13) . . ?
O12 Cu9 O5 156.0(11) . . ?
N11 Cu9 O5 86.7(12) . . ?
N12 Cu10 N34 104.3(15) . . ?
N12 Cu10 N13 78.6(15) . . ?
N34 Cu10 N13 157.7(14) . . ?
N12 Cu10 N14 156.5(15) . . ?
N34 Cu10 N14 97.9(15) . . ?
N13 Cu10 N14 83.8(15) . . ?
O14 Cu11 N15 158.4(12) . . ?
O14 Cu11 O6 72.0(11) . . ?
N15 Cu11 O6 87.2(13) . . ?
O14 Cu11 N35 94.3(12) . . ?
N15 Cu11 N35 102.6(14) . . ?
O6 Cu11 N35 153.6(12) . . ?
O14 Cu11 N44 103.1(11) . . ?
N15 Cu11 N44 87.4(12) . . ?
O6 Cu11 N44 105.2(12) . . ?
N35 Cu11 N44 99.8(11) . . ?
O14 Cu11 Cu12 38.1(7) . . ?
N15 Cu11 Cu12 120.4(10) . . ?
O6 Cu11 Cu12 37.9(8) . . ?
N35 Cu11 Cu12 119.9(9) . . ?
N44 Cu11 Cu12 120.5(9) . . ?
O6 Cu12 O14 74.3(11) . . ?
O6 Cu12 O15 98.1(11) . . ?
O14 Cu12 O15 169.1(11) . . ?
O6 Cu12 O7 110.9(13) . . ?
O14 Cu12 O7 112.7(11) . . ?
O15 Cu12 O7 77.1(11) . . ?
O6 Cu12 N45 152.9(15) . . ?
O14 Cu12 N45 94.2(13) . . ?
O15 Cu12 N45 89.3(12) . . ?
O7 Cu12 N45 96.1(14) . . ?
O6 Cu12 Cu11 39.9(9) . . ?
O14 Cu12 Cu11 38.5(8) . . ?
O15 Cu12 Cu11 131.5(8) . . ?
O7 Cu12 Cu11 131.3(8) . . ?
N45 Cu12 Cu11 118.7(11) . . ?
O6 Cu12 Cu13 118.8(9) . . ?
O14 Cu12 Cu13 151.8(8) . . ?
O15 Cu12 Cu13 38.9(8) . . ?
O7 Cu12 Cu13 40.6(8) . . ?
N45 Cu12 Cu13 82.8(11) . . ?
Cu11 Cu12 Cu13 158.3(2) . . ?
N16 Cu13 O15 164.7(13) . . ?
N16 Cu13 O7 86.1(14) . . ?
O15 Cu13 O7 78.7(11) . . ?
N16 Cu13 N36 102.4(14) . . ?
O15 Cu13 N36 90.5(12) . . ?
O7 Cu13 N36 138.7(13) . . ?
N16 Cu13 N46 98.0(16) . . ?
O15 Cu13 N46 88.4(13) . . ?
O7 Cu13 N46 121.9(14) . . ?
N36 Cu13 N46 97.2(14) . . ?
N16 Cu13 Cu12 126.7(11) . . ?
O15 Cu13 Cu12 39.1(7) . . ?
O7 Cu13 Cu12 42.2(9) . . ?
N36 Cu13 Cu12 110.2(10) . . ?
N46 Cu13 Cu12 117.7(11) . . ?
N18 Cu14 N37 154.1(18) . . ?
N18 Cu14 N17 79.1(16) . . ?
N37 Cu14 N17 95.9(17) . . ?
N18 Cu14 N19 75.5(16) . . ?
N37 Cu14 N19 108.9(17) . . ?
N17 Cu14 N19 154.1(15) . . ?
N18 Cu14 O18 104.1(15) . . ?
N37 Cu14 O18 101.3(16) . . ?
N17 Cu14 O18 90.4(12) . . ?
N19 Cu14 O18 91.5(11) . . ?
N21 Cu15 N20 168.1(15) . . ?
N21 Cu15 O9 89.7(14) . . ?
N20 Cu15 O9 94.2(16) . . ?
N21 Cu15 O8 90.0(13) . . ?
N20 Cu15 O8 89.1(15) . . ?
O9 Cu15 O8 165.4(12) . . ?
N39 Cu16 N22 169.0(15) . . ?
N39 Cu16 O1 84.4(14) . . ?
N22 Cu16 O1 101.1(13) . . ?
N39 Cu16 O8 101.7(14) . . ?
N22 Cu16 O8 85.0(12) . . ?
O1 Cu16 O8 113.4(10) . . ?
C1 O1 Cu1 115(2) . . ?
C1 O1 Cu16 130(2) . . ?
Cu1 O1 Cu16 114.5(12) . . ?
C23 O2 Cu4 132(3) . . ?
C23 O2 Cu3 123(2) . . ?
Cu4 O2 Cu3 103.5(14) . . ?
C24 O3 Cu5 126(2) . . ?
C24 O3 Cu4 130(2) . . ?
Cu5 O3 Cu4 97.2(13) . . ?
C46 O4 Cu7 125(2) . . ?
C46 O4 Cu8 124(2) . . ?
Cu7 O4 Cu8 108.4(12) . . ?
C47 O5 Cu9 119(2) . . ?
C47 O5 Cu8 132(2) . . ?
Cu9 O5 Cu8 108.5(13) . . ?
C69 O6 Cu12 135(3) . . ?
C69 O6 Cu11 122(3) . . ?
Cu12 O6 Cu11 102.2(14) . . ?
C70 O7 Cu13 127(3) . . ?
C70 O7 Cu12 131(3) . . ?
Cu13 O7 Cu12 97.2(13) . . ?
C92 O8 Cu15 120(3) . . ?
C92 O8 Cu16 131(3) . . ?
Cu15 O8 Cu16 109.2(13) . . ?
C93 O9 Cu15 127(3) . . ?
C115 O10 Cu3 127(3) . . ?
C115 O10 Cu4 128(3) . . ?
Cu3 O10 Cu4 104.7(17) . . ?
C116 O11 Cu4 121(2) . . ?
C116 O11 Cu5 127(2) . . ?
Cu4 O11 Cu5 104.9(15) . . ?
C138 O12 Cu9 131(3) . . ?
C139 O13 Cu7 128(3) . . ?
C161 O14 Cu12 126(2) . . ?
C161 O14 Cu11 128(2) . . ?
Cu12 O14 Cu11 103.4(12) . . ?
C162 O15 Cu13 131(2) . . ?
C162 O15 Cu12 117(2) . . ?
Cu13 O15 Cu12 102.0(11) . . ?
C184 O16 Cu1 130(3) . . ?
N2 N1 C7 104(3) . . ?
N2 N1 Cu1 131(2) . . ?
C7 N1 Cu1 123(3) . . ?
C9 N2 N1 111(3) . . ?
C9 N2 Cu2 116(3) . . ?
N1 N2 Cu2 130(2) . . ?
C14 N3 C10 118(4) . . ?
C14 N3 Cu2 123(3) . . ?
C10 N3 Cu2 118(3) . . ?
C15 N4 N5 112(3) . . ?
C15 N4 Cu2 114(3) . . ?
N5 N4 Cu2 133(3) . . ?
C17 N5 N4 106(3) . . ?
C17 N5 Cu3 134(3) . . ?
N4 N5 Cu3 119(2) . . ?
N7 N6 C30 109(3) . . ?
N7 N6 Cu5 124(3) . . ?
C30 N6 Cu5 126(3) . . ?
N6 N7 C32 105(3) . . ?
N6 N7 Cu6 134(3) . . ?
C32 N7 Cu6 121(3) . . ?
C37 N8 C33 117(4) . . ?
C37 N8 Cu6 123(3) . . ?
C33 N8 Cu6 119(2) . . ?
C38 N9 N10 109(3) . . ?
C38 N9 Cu6 114(3) . . ?
N10 N9 Cu6 134(2) . . ?
C40 N10 N9 104(3) . . ?
C40 N10 Cu7 129(3) . . ?
N9 N10 Cu7 127(3) . . ?
C53 N11 N12 108(3) . . ?
C53 N11 Cu9 127(3) . . ?
N12 N11 Cu9 123(3) . . ?
N11 N12 C55 106(3) . . ?
N11 N12 Cu10 135(3) . . ?
C55 N12 Cu10 116(3) . . ?
C56 N13 C60 123(4) . . ?
C56 N13 Cu10 121(3) . . ?
C60 N13 Cu10 116(3) . . ?
N15 N14 C61 115(3) . . ?
N15 N14 Cu10 139(3) . . ?
C61 N14 Cu10 105(2) . . ?
N14 N15 C63 109(3) . . ?
N14 N15 Cu11 121(3) . . ?
C63 N15 Cu11 130(3) . . ?
C76 N16 N17 103(3) . . ?
C76 N16 Cu13 134(3) . . ?
N17 N16 Cu13 123(3) . . ?
C78 N17 N16 110(3) . . ?
C78 N17 Cu14 117(3) . . ?
N16 N17 Cu14 132(3) . . ?
C79 N18 C83 113(4) . . ?
C79 N18 Cu14 121(3) . . ?
C83 N18 Cu14 125(3) . . ?
C84 N19 N20 113(3) . . ?
C84 N19 Cu14 119(3) . . ?
N20 N19 Cu14 126(3) . . ?
N19 N20 C86 103(4) . . ?
N19 N20 Cu15 133(3) . . ?
C86 N20 Cu15 123(3) . . ?
N22 N21 C99 98(3) . . ?
N22 N21 Cu15 123(3) . . ?
C99 N21 Cu15 137(3) . . ?
C101 N22 N21 109(4) . . ?
C101 N22 Cu16 132(3) . . ?
N21 N22 Cu16 119(3) . . ?
C106 N23 C102 118(3) . . ?
C107 N24 N25 102(3) . . ?
C107 N24 Cu2 134(3) . . ?
N25 N24 Cu2 121(2) . . ?
C109 N25 N24 109(3) . . ?
C109 N25 Cu3 125(3) . . ?
N24 N25 Cu3 121(3) . . ?
N27 N26 C122 105(3) . . ?
N27 N26 Cu5 125(3) . . ?
C122 N26 Cu5 128(3) . . ?
N26 N27 C124 111(3) . . ?
N26 N27 Cu6 122(3) . . ?
C124 N27 Cu6 124(3) . . ?
C125 N28 C129 124(3) . . ?
N30 N29 C130 107(3) . . ?
N30 N29 Cu8 125(3) . . ?
C130 N29 Cu8 128(3) . . ?
C132 N30 N29 103(3) . . ?
C132 N30 Cu9 137(3) . . ?
N29 N30 Cu9 117(2) . . ?
C145 N31 N32 108(3) . . ?
C145 N31 Cu7 138(3) . . ?
N32 N31 Cu7 112(3) . . ?
C147 N32 N31 99(3) . . ?
C147 N32 Cu8 133(3) . . ?
N31 N32 Cu8 127(3) . . ?
C148 N33 C152 117(3) . . ?
C153 N34 N35 104(3) . . ?
C153 N34 Cu10 134(3) . . ?
N35 N34 Cu10 120(2) . . ?
N34 N35 C155 110(3) . . ?
N34 N35 Cu11 129(2) . . ?
C155 N35 Cu11 118(3) . . ?
C168 N36 N37 111(3) . . ?
C168 N36 Cu13 122(3) . . ?
N37 N36 Cu13 120(3) . . ?
C170 N37 N36 102(4) . . ?
C170 N37 Cu14 131(3) . . ?
N36 N37 Cu14 125(3) . . ?
C171 N38 C175 116(3) . . ?
N40 N39 C176 109(3) . . ?
N40 N39 Cu16 121(3) . . ?
C176 N39 Cu16 130(3) . . ?
N39 N40 C178 105(3) . . ?
N39 N40 Cu1 120(3) . . ?
C178 N40 Cu1 134(3) . . ?
C185 N41 C189 115(5) . . ?
C185 N41 Cu3 124(4) . . ?
C189 N41 Cu3 119(4) . . ?
C190 N42 C194 110(4) . . ?
C190 N42 Cu4 127(4) . . ?
C194 N42 Cu4 123(3) . . ?
C199 N43 C195 126(5) . . ?
C199 N43 Cu5 115(4) . . ?
C195 N43 Cu5 120(4) . . ?
C200 N44 C204 108(4) . . ?
C200 N44 Cu11 119(3) . . ?
C204 N44 Cu11 109(3) . . ?
C209 N45 C205 124(4) . . ?
C209 N45 Cu12 115(4) . . ?
C205 N45 Cu12 121(3) . . ?
C210 N46 C214 122(5) . . ?
C210 N46 Cu13 120(4) . . ?
C214 N46 Cu13 118(3) . . ?
C2 C1 C6 128(4) . . ?
C2 C1 O1 114(4) . . ?
C6 C1 O1 118(4) . . ?
C1 C2 C3 115(4) . . ?
C1 C2 H2A 122.6 . . ?
C3 C2 H2A 122.6 . . ?
C4 C3 C2 123(4) . . ?
C4 C3 H3A 118.6 . . ?
C2 C3 H3A 118.6 . . ?
C3 C4 C5 126(4) . . ?
C3 C4 H4A 117.0 . . ?
C5 C4 H4A 117.0 . . ?
C4 C5 C6 113(4) . . ?
C4 C5 H5A 123.6 . . ?
C6 C5 H5A 123.6 . . ?
C7 C6 C1 131(4) . . ?
C7 C6 C5 113(4) . . ?
C1 C6 C5 115(4) . . ?
C8 C7 C6 135(4) . . ?
C8 C7 N1 110(3) . . ?
C6 C7 N1 115(4) . . ?
C7 C8 C9 105(3) . . ?
C7 C8 H8A 127.4 . . ?
C9 C8 H8A 127.4 . . ?
N2 C9 C8 109(4) . . ?
N2 C9 C10 118(4) . . ?
C8 C9 C10 132(4) . . ?
C11 C10 N3 118(4) . . ?
C11 C10 C9 136(4) . . ?
N3 C10 C9 106(3) . . ?
C12 C11 C10 120(4) . . ?
C12 C11 H11A 120.1 . . ?
C10 C11 H11A 120.1 . . ?
C11 C12 C13 120(5) . . ?
C11 C12 H12A 119.9 . . ?
C13 C12 H12A 119.9 . . ?
C14 C13 C12 121(5) . . ?
C14 C13 H13A 119.4 . . ?
C12 C13 H13A 119.4 . . ?
C13 C14 N3 122(4) . . ?
C13 C14 C15 137(4) . . ?
N3 C14 C15 101(3) . . ?
N4 C15 C16 105(4) . . ?
N4 C15 C14 125(4) . . ?
C16 C15 C14 130(4) . . ?
C17 C16 C15 109(4) . . ?
C17 C16 H16A 125.3 . . ?
C15 C16 H16A 125.3 . . ?
N5 C17 C16 107(4) . . ?
N5 C17 C18 116(4) . . ?
C16 C17 C18 137(4) . . ?
C23 C18 C17 126(4) . . ?
C23 C18 C19 120(4) . . ?
C17 C18 C19 114(4) . . ?
C20 C19 C18 117(4) . . ?
C20 C19 H19A 121.4 . . ?
C18 C19 H19A 121.4 . . ?
C19 C20 C21 125(5) . . ?
C19 C20 H20A 117.6 . . ?
C21 C20 H20A 117.6 . . ?
C22 C21 C20 120(4) . . ?
C22 C21 H21A 119.9 . . ?
C20 C21 H21A 119.9 . . ?
C21 C22 C23 118(4) . . ?
C21 C22 H22A 120.9 . . ?
C23 C22 H22A 120.9 . . ?
C18 C23 O2 125(4) . . ?
C18 C23 C22 119(4) . . ?
O2 C23 C22 115(4) . . ?
C25 C24 O3 120(3) . . ?
C25 C24 C29 121(4) . . ?
O3 C24 C29 118(3) . . ?
C24 C25 C26 119(4) . . ?
C24 C25 H25A 120.6 . . ?
C26 C25 H25A 120.6 . . ?
C25 C26 C27 120(4) . . ?
C25 C26 H26A 120.1 . . ?
C27 C26 H26A 120.1 . . ?
C28 C27 C26 117(5) . . ?
C28 C27 H27A 121.5 . . ?
C26 C27 H27A 121.5 . . ?
C27 C28 C29 123(5) . . ?
C27 C28 H28A 118.5 . . ?
C29 C28 H28A 118.5 . . ?
C28 C29 C24 119(4) . . ?
C28 C29 C30 120(4) . . ?
C24 C29 C30 120(4) . . ?
C31 C30 N6 109(4) . . ?
C31 C30 C29 126(4) . . ?
N6 C30 C29 125(4) . . ?
C30 C31 C32 108(5) . . ?
C30 C31 H31A 125.9 . . ?
C32 C31 H31A 125.9 . . ?
C31 C32 N7 108(4) . . ?
C31 C32 C33 143(5) . . ?
N7 C32 C33 108(4) . . ?
C34 C33 N8 122(3) . . ?
C34 C33 C32 126(4) . . ?
N8 C33 C32 110(3) . . ?
C35 C34 C33 120(4) . . ?
C35 C34 H34A 120.2 . . ?
C33 C34 H34A 120.2 . . ?
C34 C35 C36 117(4) . . ?
C34 C35 H35A 121.4 . . ?
C36 C35 H35A 121.4 . . ?
C37 C36 C35 122(4) . . ?
C37 C36 H36A 118.9 . . ?
C35 C36 H36A 118.9 . . ?
N8 C37 C36 120(5) . . ?
N8 C37 C38 112(4) . . ?
C36 C37 C38 128(4) . . ?
C39 C38 N9 109(4) . . ?
C39 C38 C37 138(4) . . ?
N9 C38 C37 113(4) . . ?
C38 C39 C40 105(4) . . ?
C38 C39 H39A 127.6 . . ?
C40 C39 H39A 127.6 . . ?
N10 C40 C39 113(4) . . ?
N10 C40 C41 120(4) . . ?
C39 C40 C41 126(4) . . ?
C42 C41 C46 115(4) . . ?
C42 C41 C40 120(4) . . ?
C46 C41 C40 122(4) . . ?
C43 C42 C41 120(5) . . ?
C43 C42 H42A 119.8 . . ?
C41 C42 H42A 119.8 . . ?
C44 C43 C42 120(5) . . ?
C44 C43 H43A 120.1 . . ?
C42 C43 H43A 120.1 . . ?
C43 C44 C45 119(5) . . ?
C43 C44 H44A 120.4 . . ?
C45 C44 H44A 120.4 . . ?
C46 C45 C44 124(4) . . ?
C46 C45 H45A 117.8 . . ?
C44 C45 H45A 117.8 . . ?
C45 C46 O4 121(4) . . ?
C45 C46 C41 119(4) . . ?
O4 C46 C41 121(3) . . ?
O5 C47 C48 120(3) . . ?
O5 C47 C52 123(3) . . ?
C48 C47 C52 117(4) . . ?
C49 C48 C47 121(4) . . ?
C49 C48 H48A 119.3 . . ?
C47 C48 H48A 119.3 . . ?
C50 C49 C48 119(4) . . ?
C50 C49 H49A 120.5 . . ?
C48 C49 H49A 120.5 . . ?
C51 C50 C49 125(5) . . ?
C51 C50 H50A 117.3 . . ?
C49 C50 H50A 117.3 . . ?
C50 C51 C52 118(4) . . ?
C50 C51 H51A 121.1 . . ?
C52 C51 H51A 121.1 . . ?
C51 C52 C47 119(4) . . ?
C51 C52 C53 120(4) . . ?
C47 C52 C53 121(4) . . ?
N11 C53 C54 110(3) . . ?
N11 C53 C52 119(4) . . ?
C54 C53 C52 131(4) . . ?
C55 C54 C53 102(3) . . ?
C55 C54 H54A 128.8 . . ?
C53 C54 H54A 128.8 . . ?
C54 C55 N12 114(3) . . ?
C54 C55 C56 134(4) . . ?
N12 C55 C56 111(3) . . ?
N13 C56 C57 123(4) . . ?
N13 C56 C55 108(3) . . ?
C57 C56 C55 129(4) . . ?
C58 C57 C56 114(5) . . ?
C58 C57 H57A 123.2 . . ?
C56 C57 H57A 123.2 . . ?
C57 C58 C59 123(5) . . ?
C57 C58 H58A 118.4 . . ?
C59 C58 H58A 118.4 . . ?
C60 C59 C58 119(4) . . ?
C60 C59 H59A 120.5 . . ?
C58 C59 H59A 120.5 . . ?
C61 C60 C59 127(4) . . ?
C61 C60 N13 115(4) . . ?
C59 C60 N13 118(4) . . ?
C60 C61 C62 143(4) . . ?
C60 C61 N14 120(4) . . ?
C62 C61 N14 97(3) . . ?
C63 C62 C61 110(4) . . ?
C63 C62 H62A 125.0 . . ?
C61 C62 H62A 125.0 . . ?
N15 C63 C62 109(4) . . ?
N15 C63 C64 118(3) . . ?
C62 C63 C64 133(4) . . ?
C69 C64 C63 123(4) . . ?
C69 C64 C65 123(4) . . ?
C63 C64 C65 114(3) . . ?
C66 C65 C64 117(4) . . ?
C66 C65 H65A 121.4 . . ?
C64 C65 H65A 121.4 . . ?
C65 C66 C67 120(4) . . ?
C65 C66 H66A 120.2 . . ?
C67 C66 H66A 120.2 . . ?
C68 C67 C66 126(4) . . ?
C68 C67 H67A 116.9 . . ?
C66 C67 H67A 116.9 . . ?
C67 C68 C69 115(4) . . ?
C67 C68 H68A 122.3 . . ?
C69 C68 H68A 122.3 . . ?
C64 C69 O6 125(4) . . ?
C64 C69 C68 118(4) . . ?
O6 C69 C68 117(4) . . ?
C71 C70 O7 125(4) . . ?
C71 C70 C75 113(4) . . ?
O7 C70 C75 122(4) . . ?
C72 C71 C70 128(5) . . ?
C72 C71 H71A 115.9 . . ?
C70 C71 H71A 115.9 . . ?
C71 C72 C73 124(5) . . ?
C71 C72 H72A 118.1 . . ?
C73 C72 H72A 118.1 . . ?
C72 C73 C74 120(5) . . ?
C72 C73 H73A 120.2 . . ?
C74 C73 H73A 120.2 . . ?
C75 C74 C73 111(5) . . ?
C75 C74 H74A 124.4 . . ?
C73 C74 H74A 124.4 . . ?
C70 C75 C74 124(4) . . ?
C70 C75 C76 120(4) . . ?
C74 C75 C76 116(4) . . ?
N16 C76 C77 115(4) . . ?
N16 C76 C75 120(4) . . ?
C77 C76 C75 125(4) . . ?
C76 C77 C78 102(4) . . ?
C76 C77 H77A 128.8 . . ?
C78 C77 H77A 128.8 . . ?
N17 C78 C77 110(4) . . ?
N17 C78 C79 111(4) . . ?
C77 C78 C79 139(5) . . ?
N18 C79 C80 125(5) . . ?
N18 C79 C78 111(5) . . ?
C80 C79 C78 124(5) . . ?
C79 C80 C81 119(5) . . ?
C79 C80 H80A 120.3 . . ?
C81 C80 H80A 120.3 . . ?
C82 C81 C80 121(5) . . ?
C82 C81 H81A 119.4 . . ?
C80 C81 H81A 119.4 . . ?
C81 C82 C83 113(5) . . ?
C81 C82 H82A 123.7 . . ?
C83 C82 H82A 123.7 . . ?
C84 C83 N18 107(4) . . ?
C84 C83 C82 125(4) . . ?
N18 C83 C82 128(4) . . ?
N19 C84 C85 105(4) . . ?
N19 C84 C83 112(4) . . ?
C85 C84 C83 143(4) . . ?
C86 C85 C84 115(5) . . ?
C86 C85 H85A 122.5 . . ?
C84 C85 H85A 122.5 . . ?
C85 C86 N20 104(4) . . ?
C85 C86 C87 141(5) . . ?
N20 C86 C87 115(4) . . ?
C92 C87 C88 123(5) . . ?
C92 C87 C86 127(5) . . ?
C88 C87 C86 109(4) . . ?
C89 C88 C87 113(5) . . ?
C89 C88 H88A 123.5 . . ?
C87 C88 H88A 123.5 . . ?
C88 C89 C90 126(5) . . ?
C88 C89 H89A 117.0 . . ?
C90 C89 H89A 117.0 . . ?
C89 C90 C91 113(6) . . ?
C89 C90 H90A 123.6 . . ?
C91 C90 H90A 123.6 . . ?
C92 C91 C90 127(6) . . ?
C92 C91 H91A 116.7 . . ?
C90 C91 H91A 116.7 . . ?
C87 C92 C91 117(5) . . ?
C87 C92 O8 123(4) . . ?
C91 C92 O8 120(5) . . ?
C94 C93 C98 112(4) . . ?
C94 C93 O9 123(4) . . ?
C98 C93 O9 124(4) . . ?
C93 C94 C95 128(4) . . ?
C93 C94 H94A 116.0 . . ?
C95 C94 H94A 116.0 . . ?
C96 C95 C94 116(5) . . ?
C96 C95 H95A 122.0 . . ?
C94 C95 H95A 122.0 . . ?
C95 C96 C97 122(5) . . ?
C95 C96 H96A 119.0 . . ?
C97 C96 H96A 119.0 . . ?
C96 C97 C98 116(4) . . ?
C96 C97 H97A 122.2 . . ?
C98 C97 H97A 122.2 . . ?
C93 C98 C97 126(4) . . ?
C93 C98 C99 124(4) . . ?
C97 C98 C99 110(4) . . ?
C100 C99 N21 113(4) . . ?
C100 C99 C98 137(4) . . ?
N21 C99 C98 110(4) . . ?
C100 C99 C101 38(2) . . ?
N21 C99 C101 75(2) . . ?
C98 C99 C101 175(4) . . ?
C99 C100 C101 106(4) . . ?
C99 C100 H10A 127.0 . . ?
C101 C100 H10A 127.0 . . ?
N22 C101 C100 114(4) . . ?
N22 C101 C102 116(4) . . ?
C100 C101 C102 129(4) . . ?
N22 C101 C99 78(3) . . ?
C100 C101 C99 36(2) . . ?
C102 C101 C99 163(4) . . ?
C103 C102 N23 124(4) . . ?
C103 C102 C101 121(4) . . ?
N23 C102 C101 114(4) . . ?
C102 C103 C104 123(4) . . ?
C102 C103 H10B 118.6 . . ?
C104 C103 H10B 118.6 . . ?
C103 C104 C105 110(4) . . ?
C103 C104 H10C 124.9 . . ?
C105 C104 H10C 124.9 . . ?
C106 C105 C104 123(4) . . ?
C106 C105 H10D 118.5 . . ?
C104 C105 H10D 118.5 . . ?
N23 C106 C105 121(4) . . ?
N23 C106 C107 126(4) . . ?
C105 C106 C107 113(4) . . ?
N24 C107 C108 116(4) . . ?
N24 C107 C106 124(4) . . ?
C108 C107 C106 119(5) . . ?
C107 C108 C109 101(4) . . ?
C107 C108 H10E 129.3 . . ?
C109 C108 H10E 129.3 . . ?
N25 C109 C108 111(4) . . ?
N25 C109 C110 122(4) . . ?
C108 C109 C110 127(4) . . ?
C111 C110 C115 128(6) . . ?
C111 C110 C109 115(5) . . ?
C115 C110 C109 116(5) . . ?
C110 C111 C112 126(7) . . ?
C110 C111 H11B 117.1 . . ?
C112 C111 H11B 117.1 . . ?
C111 C112 C113 103(7) . . ?
C111 C112 H11C 128.6 . . ?
C113 C112 H11C 128.6 . . ?
C114 C113 C112 120(7) . . ?
C114 C113 H11D 120.2 . . ?
C112 C113 H11D 120.2 . . ?
C113 C114 C115 134(8) . . ?
C113 C114 H11E 113.1 . . ?
C115 C114 H11E 113.1 . . ?
O10 C115 C114 130(6) . . ?
O10 C115 C110 125(5) . . ?
C114 C115 C110 105(6) . . ?
C117 C116 C121 114(4) . . ?
C117 C116 O11 125(4) . . ?
C121 C116 O11 120(4) . . ?
C118 C117 C116 127(4) . . ?
C118 C117 H11F 116.6 . . ?
C116 C117 H11F 116.6 . . ?
C117 C118 C119 119(4) . . ?
C117 C118 H11G 120.3 . . ?
C119 C118 H11G 120.3 . . ?
C120 C119 C118 113(4) . . ?
C120 C119 H11H 123.3 . . ?
C118 C119 H11H 123.3 . . ?
C121 C120 C119 123(4) . . ?
C121 C120 H12B 118.6 . . ?
C119 C120 H12B 118.6 . . ?
C120 C121 C116 122(4) . . ?
C120 C121 C122 111(3) . . ?
C116 C121 C122 126(4) . . ?
C123 C122 N26 110(4) . . ?
C123 C122 C121 131(4) . . ?
N26 C122 C121 117(4) . . ?
C122 C123 C124 109(4) . . ?
C122 C123 H12C 125.7 . . ?
C124 C123 H12C 125.7 . . ?
C125 C124 N27 126(4) . . ?
C125 C124 C123 130(4) . . ?
N27 C124 C123 103(3) . . ?
N28 C125 C126 119(3) . . ?
N28 C125 C124 119(4) . . ?
C126 C125 C124 122(4) . . ?
C127 C126 C125 121(4) . . ?
C127 C126 H12D 119.4 . . ?
C125 C126 H12D 119.4 . . ?
C126 C127 C128 121(5) . . ?
C126 C127 H12E 119.4 . . ?
C128 C127 H12E 119.4 . . ?
C129 C128 C127 117(4) . . ?
C129 C128 H12F 121.6 . . ?
C127 C128 H12F 121.6 . . ?
N28 C129 C128 118(4) . . ?
N28 C129 C130 121(3) . . ?
C128 C129 C130 121(4) . . ?
C131 C130 C129 136(4) . . ?
C131 C130 N29 106(4) . . ?
C129 C130 N29 117(3) . . ?
C130 C131 C132 109(4) . . ?
C130 C131 H13B 125.5 . . ?
C132 C131 H13B 125.5 . . ?
C131 C132 N30 113(4) . . ?
C131 C132 C133 134(4) . . ?
N30 C132 C133 111(4) . . ?
C134 C133 C138 122(5) . . ?
C134 C133 C132 115(4) . . ?
C138 C133 C132 122(4) . . ?
C133 C134 C135 124(5) . . ?
C133 C134 H13C 118.2 . . ?
C135 C134 H13C 118.2 . . ?
C136 C135 C134 110(6) . . ?
C136 C135 H13D 124.8 . . ?
C134 C135 H13D 124.8 . . ?
C137 C136 C135 133(6) . . ?
C137 C136 H13E 113.6 . . ?
C135 C136 H13E 113.6 . . ?
C136 C137 C138 115(5) . . ?
C136 C137 H13F 122.6 . . ?
C138 C137 H13F 122.6 . . ?
C137 C138 O12 124(5) . . ?
C137 C138 C133 116(5) . . ?
O12 C138 C133 120(4) . . ?
O13 C139 C140 116(4) . . ?
O13 C139 C144 123(4) . . ?
C140 C139 C144 121(4) . . ?
C141 C140 C139 119(5) . . ?
C141 C140 H14A 120.6 . . ?
C139 C140 H14A 120.6 . . ?
C140 C141 C142 121(5) . . ?
C140 C141 H14B 119.7 . . ?
C142 C141 H14B 119.7 . . ?
C143 C142 C141 118(5) . . ?
C143 C142 H14C 121.0 . . ?
C141 C142 H14C 121.0 . . ?
C142 C143 C144 126(4) . . ?
C142 C143 H14D 117.2 . . ?
C144 C143 H14D 117.2 . . ?
C143 C144 C145 121(4) . . ?
C143 C144 C139 115(4) . . ?
C145 C144 C139 124(4) . . ?
N31 C145 C146 115(4) . . ?
N31 C145 C144 114(4) . . ?
C146 C145 C144 130(5) . . ?
C147 C146 C145 100(4) . . ?
C147 C146 H14E 129.8 . . ?
C145 C146 H14E 129.8 . . ?
C146 C147 N32 118(4) . . ?
C146 C147 C148 134(4) . . ?
N32 C147 C148 108(4) . . ?
N33 C148 C149 121(4) . . ?
N33 C148 C147 117(3) . . ?
C149 C148 C147 122(4) . . ?
C150 C149 C148 122(4) . . ?
C150 C149 H14F 119.2 . . ?
C148 C149 H14F 119.2 . . ?
C149 C150 C151 120(4) . . ?
C149 C150 H15A 120.2 . . ?
C151 C150 H15A 120.2 . . ?
C152 C151 C150 115(4) . . ?
C152 C151 H15B 122.7 . . ?
C150 C151 H15B 122.7 . . ?
N33 C152 C151 126(4) . . ?
N33 C152 C153 114(3) . . ?
C151 C152 C153 120(4) . . ?
C154 C153 N34 115(4) . . ?
C154 C153 C152 125(4) . . ?
N34 C153 C152 119(4) . . ?
C153 C154 C155 108(4) . . ?
C153 C154 H15C 125.8 . . ?
C155 C154 H15C 125.8 . . ?
C154 C155 N35 102(4) . . ?
C154 C155 C156 130(4) . . ?
N35 C155 C156 127(4) . . ?
C161 C156 C157 119.8(11) . . ?
C161 C156 C155 124(3) . . ?
C157 C156 C155 116(3) . . ?
C158 C157 C156 119.9(11) . . ?
C158 C157 H15D 120.0 . . ?
C156 C157 H15D 120.0 . . ?
C159 C158 C157 120.2(11) . . ?
C159 C158 H15E 119.9 . . ?
C157 C158 H15E 119.9 . . ?
C158 C159 C160 119.7(11) . . ?
C158 C159 H15F 120.1 . . ?
C160 C159 H15F 120.1 . . ?
C159 C160 C161 120.0(11) . . ?
C159 C160 H16B 120.0 . . ?
C161 C160 H16B 120.0 . . ?
C156 C161 C160 120.1(11) . . ?
C156 C161 O14 120(2) . . ?
C160 C161 O14 119(2) . . ?
O15 C162 C163 124(3) . . ?
O15 C162 C167 123(4) . . ?
C163 C162 C167 112(3) . . ?
C164 C163 C162 121(4) . . ?
C164 C163 H16C 119.3 . . ?
C162 C163 H16C 119.3 . . ?
C163 C164 C165 126(4) . . ?
C163 C164 H16D 117.2 . . ?
C165 C164 H16D 117.2 . . ?
C164 C165 C166 114(4) . . ?
C164 C165 H16E 122.9 . . ?
C166 C165 H16E 122.9 . . ?
C167 C166 C165 120(4) . . ?
C167 C166 H16F 119.9 . . ?
C165 C166 H16F 119.9 . . ?
C166 C167 C162 125(4) . . ?
C166 C167 C168 118(4) . . ?
C162 C167 C168 117(4) . . ?
N36 C168 C169 106(3) . . ?
N36 C168 C167 125(3) . . ?
C169 C168 C167 129(4) . . ?
C170 C169 C168 104(3) . . ?
C170 C169 H16G 127.9 . . ?
C168 C169 H16G 127.9 . . ?
C169 C170 N37 116(4) . . ?
C169 C170 C171 119(4) . . ?
N37 C170 C171 126(4) . . ?
N38 C171 C172 125(4) . . ?
N38 C171 C170 120(4) . . ?
C172 C171 C170 115(3) . . ?
C173 C172 C171 117(4) . . ?
C173 C172 H17A 121.5 . . ?
C171 C172 H17A 121.5 . . ?
C172 C173 C174 119(5) . . ?
C172 C173 H17B 120.3 . . ?
C174 C173 H17B 120.3 . . ?
C175 C174 C173 118(4) . . ?
C175 C174 H17C 120.8 . . ?
C173 C174 H17C 120.8 . . ?
C174 C175 N38 124(4) . . ?
C174 C175 C176 123(4) . . ?
N38 C175 C176 113(4) . . ?
C177 C176 N39 105(4) . . ?
C177 C176 C175 138(4) . . ?
N39 C176 C175 117(4) . . ?
C178 C177 C176 112(5) . . ?
C178 C177 H17D 123.9 . . ?
C176 C177 H17D 123.9 . . ?
C177 C178 N40 109(4) . . ?
C177 C178 C179 133(5) . . ?
N40 C178 C179 118(4) . . ?
C184 C179 C178 122(4) . . ?
C184 C179 C180 119(4) . . ?
C178 C179 C180 118(4) . . ?
C181 C180 C179 118(4) . . ?
C181 C180 H18A 121.2 . . ?
C179 C180 H18A 121.2 . . ?
C182 C181 C180 120(6) . . ?
C182 C181 H18B 119.9 . . ?
C180 C181 H18B 119.9 . . ?
C181 C182 C183 124(6) . . ?
C181 C182 H18C 117.8 . . ?
C183 C182 H18C 117.8 . . ?
C184 C183 C182 116(5) . . ?
C184 C183 H18D 121.8 . . ?
C182 C183 H18D 121.8 . . ?
C183 C184 O16 116(4) . . ?
C183 C184 C179 121(4) . . ?
O16 C184 C179 122(4) . . ?
N41 C185 C186 135(5) . . ?
N41 C185 H18E 112.7 . . ?
C186 C185 H18E 112.7 . . ?
C185 C186 C187 108(5) . . ?
C185 C186 H18F 126.0 . . ?
C187 C186 H18F 126.0 . . ?
C188 C187 C186 124(5) . . ?
C188 C187 H18G 118.2 . . ?
C186 C187 H18G 118.2 . . ?
C187 C188 C189 117(6) . . ?
C187 C188 H18H 121.7 . . ?
C189 C188 H18H 121.7 . . ?
N41 C189 C188 122(5) . . ?
N41 C189 H18I 119.0 . . ?
C188 C189 H18I 119.0 . . ?
N42 C190 C191 124(5) . . ?
N42 C190 H19B 118.1 . . ?
C191 C190 H19B 118.1 . . ?
C190 C191 C192 117(5) . . ?
C190 C191 H19C 121.7 . . ?
C192 C191 H19C 121.7 . . ?
C193 C192 C191 124(6) . . ?
C193 C192 H19D 118.1 . . ?
C191 C192 H19D 118.1 . . ?
C192 C193 C194 118(6) . . ?
C192 C193 H19E 120.8 . . ?
C194 C193 H19E 120.8 . . ?
C193 C194 N42 127(5) . . ?
C193 C194 H19F 116.6 . . ?
N42 C194 H19F 116.6 . . ?
N43 C195 C196 128(6) . . ?
N43 C195 H19G 116.0 . . ?
C196 C195 H19G 116.0 . . ?
C197 C196 C195 108(7) . . ?
C197 C196 H19H 125.9 . . ?
C195 C196 H19H 125.9 . . ?
C196 C197 C198 122(7) . . ?
C196 C197 H19I 119.0 . . ?
C198 C197 H19I 119.0 . . ?
C197 C198 C199 123(7) . . ?
C197 C198 H19J 118.3 . . ?
C199 C198 H19J 118.3 . . ?
N43 C199 C198 112(6) . . ?
N43 C199 H19K 124.0 . . ?
C198 C199 H19K 124.0 . . ?
N44 C200 C201 130(4) . . ?
N44 C200 H20B 114.8 . . ?
C201 C200 H20B 114.8 . . ?
C202 C201 C200 119(4) . . ?
C202 C201 H20C 120.4 . . ?
C200 C201 H20C 120.4 . . ?
C201 C202 C203 110(5) . . ?
C201 C202 H20D 125.0 . . ?
C203 C202 H20D 125.0 . . ?
C204 C203 C202 126(6) . . ?
C204 C203 H20E 117.1 . . ?
C202 C203 H20E 117.1 . . ?
C203 C204 N44 126(5) . . ?
C203 C204 H20F 116.8 . . ?
N44 C204 H20F 116.8 . . ?
C206 C205 N45 117(4) . . ?
C206 C205 H20G 121.4 . . ?
N45 C205 H20G 121.4 . . ?
C207 C206 C205 127(6) . . ?
C207 C206 H20H 116.4 . . ?
C205 C206 H20H 116.4 . . ?
C206 C207 C208 117(7) . . ?
C206 C207 H20I 121.3 . . ?
C208 C207 H20I 121.3 . . ?
C209 C208 C207 113(6) . . ?
C209 C208 H20J 123.4 . . ?
C207 C208 H20J 123.4 . . ?
N45 C209 C208 121(5) . . ?
N45 C209 H20K 119.6 . . ?
C208 C209 H20K 119.6 . . ?
N46 C210 C211 124(5) . . ?
N46 C210 H21B 118.2 . . ?
C211 C210 H21B 118.2 . . ?
C210 C211 C212 116(6) . . ?
C210 C211 H21C 122.1 . . ?
C212 C211 H21C 122.1 . . ?
C213 C212 C211 117(7) . . ?
C213 C212 H21D 121.4 . . ?
C211 C212 H21D 121.4 . . ?
C212 C213 C214 127(7) . . ?
C212 C213 H21E 116.6 . . ?
C214 C213 H21E 116.6 . . ?
N46 C214 C213 114(5) . . ?
N46 C214 H21F 123.2 . . ?
C213 C214 H21F 123.2 . . ?
C1S N1S C5S 120.0 . . ?
N1S C1S C2S 120.0 . . ?
N1S C1S H1S 120.0 . . ?
C2S C1S H1S 120.0 . . ?
C3S C2S C1S 120.0 . . ?
C3S C2S H2S 120.0 . . ?
C1S C2S H2S 120.0 . . ?
C2S C3S C4S 120.0 . . ?
C2S C3S H3S 120.0 . . ?
C4S C3S H3S 120.0 . . ?
C3S C4S C5S 120.0 . . ?
C3S C4S H4S 120.0 . . ?
C5S C4S H4S 120.0 . . ?
C4S C5S N1S 120.0 . . ?
C4S C5S H5S 120.0 . . ?
N1S C5S H5S 120.0 . . ?
C6S N2S C10S 120.0 . . ?
C7S C6S N2S 120.0 . . ?
C7S C6S H6S 120.0 . . ?
N2S C6S H6S 120.0 . . ?
C8S C7S C6S 120.0 . . ?
C8S C7S H7S 120.0 . . ?
C6S C7S H7S 120.0 . . ?
C7S C8S C9S 120.0 . . ?
C7S C8S H8S 120.0 . . ?
C9S C8S H8S 120.0 . . ?
C10S C9S C8S 120.0 . . ?
C10S C9S H9S 120.0 . . ?
C8S C9S H9S 120.0 . . ?
C9S C10S N2S 120.0 . . ?
C9S C10S H10S 120.0 . . ?
N2S C10S H10S 120.0 . . ?
C11S N3S C15S 120.0 . . ?
N3S C11S C12S 120.0 . . ?
N3S C11S H11S 120.0 . . ?
C12S C11S H11S 120.0 . . ?
C13S C12S C11S 120.0 . . ?
C13S C12S H12S 120.0 . . ?
C11S C12S H12S 120.0 . . ?
C12S C13S C14S 120.0 . . ?
C12S C13S H13S 120.0 . . ?
C14S C13S H13S 120.0 . . ?
C15S C14S C13S 120.0 . . ?
C15S C14S H14S 120.0 . . ?
C13S C14S H14S 120.0 . . ?
C14S C15S N3S 120.0 . . ?
C14S C15S H15S 120.0 . . ?
N3S C15S H15S 120.0 . . ?
C16S N4S C20S 120.0 . . ?
N4S C16S C17S 120.0 . . ?
N4S C16S H16S 120.0 . . ?
C17S C16S H16S 120.0 . . ?
C16S C17S C18S 120.0 . . ?
C16S C17S H17S 120.0 . . ?
C18S C17S H17S 120.0 . . ?
C17S C18S C19S 120.0 . . ?
C17S C18S H18S 120.0 . . ?
C19S C18S H18S 120.0 . . ?
C20S C19S C18S 120.0 . . ?
C20S C19S H19S 120.0 . . ?
C18S C19S H19S 120.0 . . ?
C19S C20S N4S 120.0 . . ?
C19S C20S H20S 120.0 . . ?
N4S C20S H20S 120.0 . . ?
C21S N5S C25S 120.0 . . ?
N5S C21S C22S 120.0 . . ?
N5S C21S H21S 120.0 . . ?
C22S C21S H21S 120.0 . . ?
C23S C22S C21S 120.0 . . ?
C23S C22S H22S 120.0 . . ?
C21S C22S H22S 120.0 . . ?
C24S C23S C22S 120.0 . . ?
C24S C23S H23S 120.0 . . ?
C22S C23S H23S 120.0 . . ?
C23S C24S C25S 120.0 . . ?
C23S C24S H24S 120.0 . . ?
C25S C24S H24S 120.0 . . ?
C24S C25S N5S 120.0 . . ?
C24S C25S H25S 120.0 . . ?
N5S C25S H25S 120.0 . . ?
 
_refine_diff_density_max    1.308
_refine_diff_density_min   -1.149
_refine_diff_density_rms    0.218

_shelxl_version_number 2013-3

_shelx_res_file
;
TITL test in P-1                      P-1
CELL  0.77490   21.968   22.557   25.407    65.291    64.961    76.157
ZERR 2           0.008    0.008    0.009     0.005     0.005     0.005
LATT   1
SFAC  C  H  Cu  N  O
DISP    Cu   0.13301   1.48033     6565.59
DISP    O   -0.00415   0.00737       40.17
DISP    N   -0.00306   0.00403       23.92
DISP    C   -0.00202   0.00197       13.60
DISP    H    0.00000   0.00000        0.67
UNIT   478  330  32 102  38
TEMP  -123

REM squeezed all C iso

L.S. 16
BOND $H
ACTA 43.7
FMAP 2
PLAN 10
SADI C156 C157 C157 C158 C158 C159 C159 C160 C160 C161 C161 C156
SADI C156 C158 C157 C159 C158 C160 C159 C161 C160 C156 C161 C157
DFIX 1.38 N21 N22 N24 N25
WGHT    0.001200 1409.730957
FVAR       1.68285   0.18571   0.16939   0.19421   0.16391   0.14894
CU1   3    0.557871    0.154682   -0.036149    11.00000    0.06326    0.06035 =
         0.04605   -0.03680   -0.02927    0.02222
CU2   3    0.483202    0.065944    0.144017    11.00000    0.07508    0.05412 =
         0.04422   -0.03003   -0.02892    0.01146
CU3   3    0.434119    0.191639    0.213615    11.00000    0.07083    0.06703 =
         0.04735   -0.04153   -0.02490    0.01453
CU4   3    0.456541    0.250889    0.288074    11.00000    0.06764    0.05785 =
         0.05797   -0.04241   -0.02748    0.01701
CU5   3    0.433090    0.296122    0.391124    11.00000    0.06218    0.05965 =
         0.07203   -0.05054   -0.03461    0.02842
CU6   3    0.510474    0.385845    0.438144    11.00000    0.07301    0.04861 =
         0.06042   -0.04014   -0.03411    0.02844
CU7   3    0.629490    0.261973    0.522274    11.00000    0.06785    0.05334 =
         0.04689   -0.03603   -0.02291    0.01685
CU8   3    0.772194    0.202289    0.442154    11.00000    0.06922    0.05154 =
         0.04314   -0.03185   -0.02572    0.01454
CU9   3    0.930102    0.147541    0.416839    11.00000    0.07003    0.04662 =
         0.04017   -0.02619   -0.03081    0.01714
CU10  3    1.007443    0.051901    0.307568    11.00000    0.07230    0.04208 =
         0.02461   -0.01537   -0.02397    0.01501
CU11  3    1.037978    0.179549    0.149599    11.00000    0.06424    0.04126 =
         0.02821   -0.01925   -0.02108    0.01900
CU12  3    1.008952    0.235634    0.034214    11.00000    0.06438    0.05164 =
         0.05931   -0.03978   -0.03328    0.02624
CU13  3    1.034377    0.275519   -0.100750    11.00000    0.06424    0.04440 =
         0.04345   -0.01919   -0.02475    0.00881
CU14  3    0.967555    0.355738   -0.226621    11.00000    0.08214    0.04526 =
         0.05473   -0.02603   -0.03318    0.01626
CU15  3    0.859331    0.233494   -0.215536    11.00000    0.06276    0.04867 =
         0.05537   -0.03433   -0.02902    0.02297
CU16  3    0.711152    0.199079   -0.104529    11.00000    0.06208    0.04835 =
         0.03887   -0.02271   -0.02762    0.02482
O1    5    0.648422    0.140548   -0.089563    11.00000    0.04052
O2    5    0.395794    0.202213    0.293074    11.00000    0.05035
O3    5    0.405915    0.325813    0.320338    11.00000    0.06360
O4    5    0.727962    0.260889    0.494489    11.00000    0.04651
O5    5    0.840134    0.136680    0.480601    11.00000    0.04185
O6    5    1.074453    0.182928    0.064467    11.00000    0.05347
O7    5    1.050366    0.308001   -0.047533    11.00000    0.05729
O8    5    0.766506    0.247779   -0.201066    11.00000    0.04954
O9    5    0.952282    0.210957   -0.244619    11.00000    0.06402
O10   5    0.465467    0.264885    0.205755    11.00000    0.06153
O11   5    0.448554    0.219788    0.372208    11.00000    0.05770
O12   5    1.017375    0.159159    0.384876    11.00000    0.04064
O13   5    0.540724    0.251467    0.575242    11.00000    0.06462
O14   5    0.997248    0.254533    0.103056    11.00000    0.03843
O15   5    1.021969    0.199173   -0.026377    11.00000    0.03764
O16   5    0.466511    0.175462   -0.010408    11.00000    0.07588
O17   5    0.403043    0.134039    0.111256    11.00000    0.05799
O18   5    1.045044    0.282470   -0.264762    11.00000    0.05451
O19   5    0.451807    0.328529    0.523173    11.00000    0.06317
N1    4    0.554747    0.065794    0.014273    11.00000    0.03460
N2    4    0.517944    0.035973    0.073194    11.00000    0.03692
N3    4    0.462346   -0.024206    0.184946    11.00000    0.05836
N4    4    0.428614    0.060901    0.228994    11.00000    0.03961
N5    4    0.399760    0.107304    0.255952    11.00000    0.04089
N6    4    0.407602    0.381844    0.393468    11.00000    0.05602
N7    4    0.440272    0.411841    0.409119    11.00000    0.04136
N8    4    0.501753    0.476125    0.424417    11.00000    0.04098
N9    4    0.578549    0.394391    0.467277    11.00000    0.04273
N10   4    0.627318    0.352470    0.487186    11.00000    0.04547
N11   4    0.937146    0.058738    0.436179    11.00000    0.03151
N12   4    0.978985    0.029575    0.395202    11.00000    0.05153
N13   4    1.050421   -0.037204    0.332530    11.00000    0.05313
N14   4    1.070751    0.057229    0.223136    11.00000    0.04930
N15   4    1.087084    0.097198    0.169279    11.00000    0.04102
N16   4    1.053562    0.356415   -0.160434    11.00000    0.05201
N17   4    1.033209    0.381523   -0.211320    11.00000    0.04713
N18   4    0.986543    0.431881   -0.288663    11.00000    0.06348
N19   4    0.914368    0.363456   -0.277512    11.00000    0.04262
N20   4    0.867959    0.323090   -0.261912    11.00000    0.06465
N21   4    0.847173    0.156540   -0.160447    11.00000    0.03803
N22   4    0.790028    0.142075   -0.106094    11.00000    0.06087
N23   4    0.697831    0.112902    0.008748    11.00000    0.02486
N24   4    0.538156    0.132068    0.122519    11.00000    0.03698
N25   4    0.509812    0.190615    0.132664    11.00000    0.05891
N26   4    0.515937    0.276200    0.406086    11.00000    0.04383
N27   4    0.552058    0.321359    0.399953    11.00000    0.04815
N28   4    0.730302    0.317144    0.360454    11.00000    0.04493
N29   4    0.844009    0.252382    0.389121    11.00000    0.05086
N30   4    0.909726    0.232435    0.385546    11.00000    0.03797
N31   4    0.638470    0.175027    0.531986    11.00000    0.04797
N32   4    0.700116    0.158283    0.486756    11.00000    0.05799
N33   4    0.786533    0.109736    0.407414    11.00000    0.03689
N34   4    0.942078    0.119243    0.284274    11.00000    0.04511
N35   4    0.962660    0.173392    0.231818    11.00000    0.03426
N36   4    0.957538    0.256552   -0.110765    11.00000    0.03999
N37   4    0.926260    0.304805   -0.147943    11.00000    0.08035
N38   4    0.745855    0.307226   -0.110129    11.00000    0.04859
N39   4    0.634863    0.256693   -0.090149    11.00000    0.05657
N40   4    0.572103    0.237649   -0.070368    11.00000    0.03996
N41   4    0.357028    0.250614    0.173843    11.00000    0.07112
N42   4    0.546612    0.272945    0.260574    11.00000    0.07657
N43   4    0.358393    0.248265    0.485151    11.00000    0.05890
N44   4    1.118008    0.221995    0.158344    11.00000    0.03725
N45   4    0.910479    0.264005    0.040347    11.00000    0.06033
N46   4    1.115634    0.215667   -0.154262    11.00000    0.07562
C1    1    0.659414    0.088707   -0.112168    11.00000    0.06129
C2    1    0.704698    0.100132   -0.169691    11.00000    0.04677
AFIX  43
H2A   2    0.730917    0.136966   -0.191841    11.00000   -1.20000
AFIX   0
C3    1    0.710756    0.053095   -0.195310    11.00000    0.03720
AFIX  43
H3A   2    0.740183    0.060076   -0.237223    11.00000   -1.20000
AFIX   0
C4    1    0.678296    0.001645   -0.164412    11.00000    0.06022
AFIX  43
H4A   2    0.684000   -0.026305   -0.185880    11.00000   -1.20000
AFIX   0
C5    1    0.634215   -0.017729   -0.100561    11.00000    0.04652
AFIX  43
H5A   2    0.614210   -0.058374   -0.078038    11.00000   -1.20000
AFIX   0
C6    1    0.622683    0.033686   -0.072412    11.00000    0.06059
C7    1    0.582958    0.014223   -0.009919    11.00000    0.02987
C8    1    0.560419   -0.038725    0.031366    11.00000    0.03401
AFIX  43
H8A   2    0.566233   -0.079569    0.026650    11.00000   -1.20000
AFIX   0
C9    1    0.524303   -0.024683    0.086754    11.00000    0.03825
C10   1    0.486523   -0.064749    0.149000    11.00000    0.04295
C11   1    0.474442   -0.128013    0.178704    11.00000    0.04221
AFIX  43
H11A  2    0.492446   -0.157287    0.156671    11.00000   -1.20000
AFIX   0
C12   1    0.437366   -0.149740    0.238835    11.00000    0.07959
AFIX  43
H12A  2    0.426158   -0.193987    0.259339    11.00000   -1.20000
AFIX   0
C13   1    0.414757   -0.108086    0.272116    11.00000    0.06326
AFIX  43
H13A  2    0.392717   -0.125391    0.316077    11.00000   -1.20000
AFIX   0
C14   1    0.422668   -0.049980    0.246013    11.00000    0.03771
C15   1    0.407233    0.006888    0.263849    11.00000    0.04208
C16   1    0.360241    0.016581    0.318331    11.00000    0.05496
AFIX  43
H16A  2    0.334047   -0.016040    0.354271    11.00000   -1.20000
AFIX   0
C17   1    0.358122    0.077583    0.311916    11.00000    0.03459
C18   1    0.322223    0.117257    0.348093    11.00000    0.04400
C19   1    0.258050    0.093650    0.395558    11.00000    0.04635
AFIX  43
H19A  2    0.241875    0.055791    0.399825    11.00000   -1.20000
AFIX   0
C20   1    0.223835    0.126373    0.431794    11.00000    0.06936
AFIX  43
H20A  2    0.179722    0.114115    0.459863    11.00000   -1.20000
AFIX   0
C21   1    0.245787    0.175856    0.432685    11.00000    0.04010
AFIX  43
H21A  2    0.221809    0.191794    0.465820    11.00000   -1.20000
AFIX   0
C22   1    0.298630    0.201810    0.389427    11.00000    0.05008
AFIX  43
H22A  2    0.311099    0.241157    0.386030    11.00000   -1.20000
AFIX   0
C23   1    0.341633    0.168140    0.342992    11.00000    0.05040
C24   1    0.346936    0.363110    0.315573    11.00000    0.02894
C25   1    0.319527    0.357296    0.281523    11.00000    0.03736
AFIX  43
H25A  2    0.337976    0.325796    0.261980    11.00000   -1.20000
AFIX   0
C26   1    0.263495    0.397545    0.274428    11.00000    0.05910
AFIX  43
H26A  2    0.243166    0.394429    0.249377    11.00000   -1.20000
AFIX   0
C27   1    0.235197    0.445198    0.305507    11.00000    0.06304
AFIX  43
H27A  2    0.194177    0.470699    0.304529    11.00000   -1.20000
AFIX   0
C28   1    0.268649    0.451101    0.334507    11.00000    0.06335
AFIX  43
H28A  2    0.252051    0.482802    0.353831    11.00000   -1.20000
AFIX   0
C29   1    0.325383    0.414553    0.338365    11.00000    0.04890
C30   1    0.363514    0.426504    0.368677    11.00000    0.05584
C31   1    0.365041    0.484109    0.371486    11.00000    0.06676
AFIX  43
H31A  2    0.336486    0.522380    0.360695    11.00000   -1.20000
AFIX   0
C32   1    0.414068    0.478330    0.392256    11.00000    0.06856
C33   1    0.457839    0.517514    0.395418    11.00000    0.03475
C34   1    0.447782    0.583999    0.384772    11.00000    0.04842
AFIX  43
H34A  2    0.411334    0.609336    0.372780    11.00000   -1.20000
AFIX   0
C35   1    0.488395    0.611274    0.391288    11.00000    0.04966
AFIX  43
H35A  2    0.484330    0.657115    0.381995    11.00000   -1.20000
AFIX   0
C36   1    0.538534    0.570429    0.412589    11.00000    0.06361
AFIX  43
H36A  2    0.570496    0.589477    0.415662    11.00000   -1.20000
AFIX   0
C37   1    0.543123    0.503009    0.429379    11.00000    0.06802
C38   1    0.591368    0.456789    0.450350    11.00000    0.04058
C39   1    0.647904    0.456120    0.457852    11.00000    0.05030
AFIX  43
H39A  2    0.669632    0.492661    0.449138    11.00000   -1.20000
AFIX   0
C40   1    0.667697    0.391874    0.480652    11.00000    0.04756
C41   1    0.730008    0.364847    0.495265    11.00000    0.04735
C42   1    0.771597    0.406471    0.490235    11.00000    0.06991
AFIX  43
H42A  2    0.760389    0.452367    0.477117    11.00000   -1.20000
AFIX   0
C43   1    0.827078    0.382154    0.503758    11.00000    0.05881
AFIX  43
H43A  2    0.848983    0.408341    0.510572    11.00000   -1.20000
AFIX   0
C44   1    0.851347    0.321852    0.507628    11.00000    0.06193
AFIX  43
H44A  2    0.892563    0.305222    0.514252    11.00000   -1.20000
AFIX   0
C45   1    0.817772    0.284650    0.502203    11.00000    0.04750
AFIX  43
H45A  2    0.837474    0.242128    0.502780    11.00000   -1.20000
AFIX   0
C46   1    0.759999    0.302268    0.496174    11.00000    0.03302
C47   1    0.831772    0.091367    0.536337    11.00000    0.03173
C48   1    0.783521    0.101432    0.587925    11.00000    0.03877
AFIX  43
H48A  2    0.754574    0.140472    0.583252    11.00000   -1.20000
AFIX   0
C49   1    0.775952    0.057551    0.645086    11.00000    0.05082
AFIX  43
H49A  2    0.742723    0.065709    0.680735    11.00000   -1.20000
AFIX   0
C50   1    0.814646    0.003705    0.651123    11.00000    0.04876
AFIX  43
H50A  2    0.807843   -0.026876    0.692191    11.00000   -1.20000
AFIX   0
C51   1    0.861638   -0.011726    0.605897    11.00000    0.05575
AFIX  43
H51A  2    0.890359   -0.050621    0.613660    11.00000   -1.20000
AFIX   0
C52   1    0.868851    0.030325    0.545577    11.00000    0.04490
C53   1    0.918618    0.012552    0.493080    11.00000    0.04634
C54   1    0.952165   -0.049837    0.489789    11.00000    0.02962
AFIX  43
H54A  2    0.951225   -0.090755    0.522776    11.00000   -1.20000
AFIX   0
C55   1    0.984180   -0.035775    0.429906    11.00000    0.03426
C56   1    1.036537   -0.073856    0.390434    11.00000    0.04133
C57   1    1.065329   -0.135656    0.409129    11.00000    0.06613
AFIX  43
H57A  2    1.055470   -0.162932    0.451647    11.00000   -1.20000
AFIX   0
C58   1    1.109285   -0.154603    0.361518    11.00000    0.05788
AFIX  43
H58A  2    1.129382   -0.198151    0.370947    11.00000   -1.20000
AFIX   0
C59   1    1.126207   -0.114359    0.300680    11.00000    0.03940
AFIX  43
H59A  2    1.157996   -0.129468    0.268666    11.00000   -1.20000
AFIX   0
C60   1    1.097947   -0.054293    0.286844    11.00000    0.04285
C61   1    1.113757   -0.007904    0.232161    11.00000    0.04235
C62   1    1.157612    0.006429    0.168590    11.00000    0.04028
AFIX  43
H62A  2    1.192934   -0.022711    0.153114    11.00000   -1.20000
AFIX   0
C63   1    1.140681    0.070465    0.132042    11.00000    0.03519
C64   1    1.170663    0.109865    0.068118    11.00000    0.03452
C65   1    1.239194    0.087340    0.038396    11.00000    0.03072
AFIX  43
H65A  2    1.261077    0.049941    0.060782    11.00000   -1.20000
AFIX   0
C66   1    1.269969    0.120701   -0.020835    11.00000    0.03772
AFIX  43
H66A  2    1.316231    0.110077   -0.041458    11.00000   -1.20000
AFIX   0
C67   1    1.235527    0.170022   -0.052097    11.00000    0.04855
AFIX  43
H67A  2    1.258234    0.189949   -0.095731    11.00000   -1.20000
AFIX   0
C68   1    1.172397    0.193726   -0.027688    11.00000    0.03544
AFIX  43
H68A  2    1.151471    0.230170   -0.051950    11.00000   -1.20000
AFIX   0
C69   1    1.138140    0.159921    0.038371    11.00000    0.05001
C70   1    1.097029    0.349225   -0.065062    11.00000    0.04180
C71   1    1.124902    0.350822   -0.028926    11.00000    0.06268
AFIX  43
H71A  2    1.112791    0.318265    0.011689    11.00000   -1.20000
AFIX   0
C72   1    1.164589    0.389069   -0.041058    11.00000    0.05427
AFIX  43
H72A  2    1.176033    0.387158   -0.008240    11.00000   -1.20000
AFIX   0
C73   1    1.191157    0.430910   -0.094746    11.00000    0.06377
AFIX  43
H73A  2    1.225091    0.456086   -0.102459    11.00000   -1.20000
AFIX   0
C74   1    1.169000    0.440262   -0.145244    11.00000    0.09873
AFIX  43
H74A  2    1.185522    0.471534   -0.186241    11.00000   -1.20000
AFIX   0
C75   1    1.118929    0.395694   -0.124239    11.00000    0.04512
C76   1    1.089779    0.402465   -0.171898    11.00000    0.05647
C77   1    1.095721    0.454179   -0.225887    11.00000    0.06547
AFIX  43
H77A  2    1.120859    0.491304   -0.243928    11.00000   -1.20000
AFIX   0
C78   1    1.056016    0.439152   -0.247895    11.00000    0.04850
C79   1    1.033199    0.466693   -0.297292    11.00000    0.07042
C80   1    1.056037    0.522734   -0.347722    11.00000    0.05464
AFIX  43
H80A  2    1.093642    0.541758   -0.353498    11.00000   -1.20000
AFIX   0
C81   1    1.022785    0.551929   -0.391150    11.00000    0.07143
AFIX  43
H81A  2    1.034412    0.593646   -0.422577    11.00000   -1.20000
AFIX   0
C82   1    0.973486    0.520442   -0.388414    11.00000    0.07243
AFIX  43
H82A  2    0.951994    0.537220   -0.417856    11.00000   -1.20000
AFIX   0
C83   1    0.958796    0.460043   -0.336365    11.00000    0.05025
C84   1    0.911134    0.417666   -0.321529    11.00000    0.03901
C85   1    0.865304    0.412043   -0.338346    11.00000    0.05636
AFIX  43
H85A  2    0.855737    0.444192   -0.373216    11.00000   -1.20000
AFIX   0
C86   1    0.833989    0.359968   -0.304447    11.00000    0.05631
C87   1    0.775471    0.328604   -0.295813    11.00000    0.05593
C88   1    0.758799    0.359963   -0.351977    11.00000    0.06397
AFIX  43
H88A  2    0.783517    0.393302   -0.388270    11.00000   -1.20000
AFIX   0
C89   1    0.706628    0.337389   -0.346956    11.00000    0.06051
AFIX  43
H89A  2    0.695992    0.352456   -0.383244    11.00000   -1.20000
AFIX   0
C90   1    0.666969    0.295308   -0.295868    11.00000    0.09226
AFIX  43
H90A  2    0.627199    0.282459   -0.293013    11.00000   -1.20000
AFIX   0
C91   1    0.689308    0.272435   -0.247875    11.00000    0.07842
AFIX  43
H91A  2    0.661005    0.244858   -0.208923    11.00000   -1.20000
AFIX   0
C92   1    0.744770    0.284330   -0.249867    11.00000    0.04907
C93   1    0.981818    0.152528   -0.240580    11.00000    0.03986
C94   1    1.040785    0.142529   -0.277166    11.00000    0.04041
AFIX  43
H94A  2    1.061600    0.180253   -0.310244    11.00000   -1.20000
AFIX   0
C95   1    1.079548    0.081787   -0.274741    11.00000    0.06508
AFIX  43
H95A  2    1.124053    0.079149   -0.303806    11.00000   -1.20000
AFIX   0
C96   1    1.051703    0.032464   -0.232365    11.00000    0.05092
AFIX  43
H96A  2    1.073951   -0.009515   -0.231040    11.00000   -1.20000
AFIX   0
C97   1    0.990535    0.036658   -0.187927    11.00000    0.04176
AFIX  43
H97A  2    0.970141   -0.000867   -0.154144    11.00000   -1.20000
AFIX   0
C98   1    0.959309    0.099919   -0.195024    11.00000    0.04205
C99   1    0.889381    0.097527   -0.141376    11.00000    0.04898
C100  1    0.860728    0.058623   -0.089612    11.00000    0.03165
AFIX  43
H10A  2    0.878543    0.016754   -0.068999    11.00000   -1.20000
AFIX   0
C101  1    0.800601    0.086307   -0.068364    11.00000    0.04878
C102  1    0.746328    0.065996   -0.001485    11.00000    0.04315
C103  1    0.746401    0.008729    0.036063    11.00000    0.04313
AFIX  43
H10B  2    0.780868   -0.022468    0.023243    11.00000   -1.20000
AFIX   0
C104  1    0.699231   -0.011098    0.094679    11.00000    0.06281
AFIX  43
H10C  2    0.700826   -0.052788    0.126068    11.00000   -1.20000
AFIX   0
C105  1    0.647448    0.039312    0.102167    11.00000    0.04518
AFIX  43
H10D  2    0.608012    0.029460    0.138785    11.00000   -1.20000
AFIX   0
C106  1    0.651444    0.099497    0.060526    11.00000    0.04258
C107  1    0.597546    0.146985    0.083440    11.00000    0.06343
C108  1    0.610096    0.207659    0.063167    11.00000    0.04431
AFIX  43
H10E  2    0.649722    0.228726    0.032731    11.00000   -1.20000
AFIX   0
C109  1    0.550502    0.233467    0.097619    11.00000    0.03563
C110  1    0.536068    0.302571    0.099656    11.00000    0.07448
C111  1    0.562614    0.346806    0.049201    11.00000    0.09198
AFIX  43
H11B  2    0.594746    0.333646    0.016014    11.00000   -1.20000
AFIX   0
C112  1    0.548201    0.419533    0.036150    11.00000    0.14860
AFIX  43
H11C  2    0.558103    0.454638   -0.002930    11.00000   -1.20000
AFIX   0
C113  1    0.512549    0.422638    0.103715    11.00000    0.09283
AFIX  43
H11D  2    0.512947    0.461007    0.110279    11.00000   -1.20000
AFIX   0
C114  1    0.483189    0.373252    0.149453    11.00000    0.12233
AFIX  43
H11E  2    0.450358    0.384265    0.183692    11.00000   -1.20000
AFIX   0
C115  1    0.488797    0.308911    0.159548    11.00000    0.07058
C116  1    0.481422    0.160298    0.397461    11.00000    0.04563
C117  1    0.470220    0.102346    0.402940    11.00000    0.05003
AFIX  43
H11F  2    0.430263    0.100183    0.398190    11.00000   -1.20000
AFIX   0
C118  1    0.508197    0.048230    0.414126    11.00000    0.05457
AFIX  43
H11G  2    0.498012    0.010163    0.413146    11.00000   -1.20000
AFIX   0
C119  1    0.564901    0.046562    0.427789    11.00000    0.05142
AFIX  43
H11H  2    0.590786    0.007338    0.442000    11.00000   -1.20000
AFIX   0
C120  1    0.578734    0.106701    0.418569    11.00000    0.04162
AFIX  43
H12B  2    0.620142    0.110886    0.419694    11.00000   -1.20000
AFIX   0
C121  1    0.536489    0.160023    0.408015    11.00000    0.03372
C122  1    0.562151    0.218946    0.405462    11.00000    0.05769
C123  1    0.624343    0.233614    0.388322    11.00000    0.05244
AFIX  43
H12C  2    0.663705    0.204523    0.382192    11.00000   -1.20000
AFIX   0
C124  1    0.622268    0.302214    0.380402    11.00000    0.04839
C125  1    0.674287    0.342357    0.355855    11.00000    0.02596
C126  1    0.664734    0.406364    0.333123    11.00000    0.03885
AFIX  43
H12D  2    0.622821    0.425809    0.328912    11.00000   -1.20000
AFIX   0
C127  1    0.709065    0.441611    0.317178    11.00000    0.06263
AFIX  43
H12E  2    0.700513    0.487804    0.301443    11.00000   -1.20000
AFIX   0
C128  1    0.770538    0.415580    0.321659    11.00000    0.05429
AFIX  43
H12F  2    0.804739    0.442610    0.309907    11.00000   -1.20000
AFIX   0
C129  1    0.779991    0.351008    0.343132    11.00000    0.02998
C130  1    0.843500    0.319579    0.346319    11.00000    0.03807
C131  1    0.903587    0.337802    0.325688    11.00000    0.05150
AFIX  43
H13B  2    0.916905    0.381079    0.300783    11.00000   -1.20000
AFIX   0
C132  1    0.943120    0.286721    0.344797    11.00000    0.06051
C133  1    1.018250    0.277364    0.341911    11.00000    0.05476
C134  1    1.043899    0.329048    0.325852    11.00000    0.05664
AFIX  43
H13C  2    1.019092    0.369542    0.312836    11.00000   -1.20000
AFIX   0
C135  1    1.104087    0.330364    0.326020    11.00000    0.08945
AFIX  43
H13D  2    1.124771    0.369054    0.313324    11.00000   -1.20000
AFIX   0
C136  1    1.130583    0.271024    0.346079    11.00000    0.07301
AFIX  43
H13E  2    1.174305    0.269348    0.345871    11.00000   -1.20000
AFIX   0
C137  1    1.109309    0.214001    0.366198    11.00000    0.03191
AFIX  43
H13F  2    1.133962    0.174509    0.382021    11.00000   -1.20000
AFIX   0
C138  1    1.050497    0.214961    0.363020    11.00000    0.07742
C139  1    0.510657    0.194995    0.614519    11.00000    0.04073
C140  1    0.449533    0.200447    0.659192    11.00000    0.07090
AFIX  43
H14A  2    0.429056    0.242155    0.660743    11.00000   -1.20000
AFIX   0
C141  1    0.418640    0.145593    0.701149    11.00000    0.05540
AFIX  43
H14B  2    0.379434    0.147913    0.736082    11.00000   -1.20000
AFIX   0
C142  1    0.443234    0.086332    0.693954    11.00000    0.05764
AFIX  43
H14C  2    0.418865    0.048487    0.720623    11.00000   -1.20000
AFIX   0
C143  1    0.501839    0.083526    0.648799    11.00000    0.04700
AFIX  43
H14D  2    0.518740    0.042059    0.644913    11.00000   -1.20000
AFIX   0
C144  1    0.538948    0.133441    0.608591    11.00000    0.04311
C145  1    0.600497    0.124964    0.561259    11.00000    0.06547
C146  1    0.629473    0.071144    0.544154    11.00000    0.04757
AFIX  43
H14E  2    0.612705    0.029590    0.559743    11.00000   -1.20000
AFIX   0
C147  1    0.687393    0.093738    0.499771    11.00000    0.05298
C148  1    0.743572    0.067813    0.454023    11.00000    0.03418
C149  1    0.748708    0.005024    0.457478    11.00000    0.03740
AFIX  43
H14F  2    0.713860   -0.022649    0.488400    11.00000   -1.20000
AFIX   0
C150  1    0.800310   -0.018122    0.419370    11.00000    0.06138
AFIX  43
H15A  2    0.805551   -0.063364    0.425728    11.00000   -1.20000
AFIX   0
C151  1    0.848326    0.024525    0.368604    11.00000    0.05222
AFIX  43
H15B  2    0.884626    0.010717    0.337786    11.00000   -1.20000
AFIX   0
C152  1    0.838548    0.086235    0.367384    11.00000    0.04119
C153  1    0.880379    0.135825    0.314481    11.00000    0.03788
C154  1    0.859170    0.194794    0.288212    11.00000    0.05391
AFIX  43
H15C  2    0.816111    0.215385    0.304655    11.00000   -1.20000
AFIX   0
C155  1    0.909807    0.223226    0.231817    11.00000    0.04479
C156  1    0.910005    0.288782    0.182327    11.00000    0.03718
C157  1    0.862749    0.335154    0.199573    11.00000    0.06382
AFIX  43
H15D  2    0.833232    0.325526    0.241803    11.00000   -1.20000
AFIX   0
C158  1    0.857730    0.395105    0.156550    11.00000    0.08101
AFIX  43
H15E  2    0.823342    0.426897    0.168271    11.00000   -1.20000
AFIX   0
C159  1    0.901475    0.409919    0.096950    11.00000    0.05211
AFIX  43
H15F  2    0.900089    0.453013    0.067514    11.00000   -1.20000
AFIX   0
C160  1    0.947294    0.363069    0.079370    11.00000    0.06742
AFIX  43
H16B  2    0.975466    0.372159    0.036829    11.00000   -1.20000
AFIX   0
C161  1    0.952934    0.303212    0.122498    11.00000    0.04665
C162  1    0.991645    0.148243   -0.006531    11.00000    0.02872
C163  1    1.006024    0.088163    0.035436    11.00000    0.02319
AFIX  43
H16C  2    1.041159    0.083917    0.049512    11.00000   -1.20000
AFIX   0
C164  1    0.973470    0.039483    0.055044    11.00000    0.04494
AFIX  43
H16D  2    0.990502   -0.001671    0.077701    11.00000   -1.20000
AFIX   0
C165  1    0.918687    0.040653    0.046992    11.00000    0.04928
AFIX  43
H16E  2    0.890935    0.004960    0.069019    11.00000   -1.20000
AFIX   0
C166  1    0.903379    0.101264    0.001368    11.00000    0.04134
AFIX  43
H16F  2    0.869004    0.103721   -0.012986    11.00000   -1.20000
AFIX   0
C167  1    0.934209    0.148510   -0.018353    11.00000    0.05188
C168  1    0.914877    0.211578   -0.065739    11.00000    0.03451
C169  1    0.850852    0.234231   -0.071732    11.00000    0.02698
AFIX  43
H16G  2    0.810163    0.212821   -0.048174    11.00000   -1.20000
AFIX   0
C170  1    0.860719    0.289802   -0.115952    11.00000    0.03333
C171  1    0.802782    0.332406   -0.126170    11.00000    0.03727
C172  1    0.814547    0.400752   -0.157994    11.00000    0.05290
AFIX  43
H17A  2    0.857480    0.415672   -0.171445    11.00000   -1.20000
AFIX   0
C173  1    0.761528    0.443031   -0.167966    11.00000    0.06227
AFIX  43
H17B  2    0.766654    0.488692   -0.188608    11.00000   -1.20000
AFIX   0
C174  1    0.696750    0.417734   -0.146728    11.00000    0.06016
AFIX  43
H17C  2    0.657812    0.446643   -0.148844    11.00000   -1.20000
AFIX   0
C175  1    0.693353    0.352926   -0.124201    11.00000    0.04892
C176  1    0.629998    0.322215   -0.101558    11.00000    0.05595
C177  1    0.564393    0.341313   -0.091355    11.00000    0.07000
AFIX  43
H17D  2    0.545799    0.384953   -0.095774    11.00000   -1.20000
AFIX   0
C178  1    0.530627    0.294954   -0.075359    11.00000    0.05764
C179  1    0.460676    0.290629   -0.059974    11.00000    0.05249
C180  1    0.419820    0.350589   -0.078100    11.00000    0.04924
AFIX  43
H18A  2    0.437618    0.392074   -0.096324    11.00000   -1.20000
AFIX   0
C181  1    0.355342    0.345506   -0.068179    11.00000    0.07508
AFIX  43
H18B  2    0.327455    0.383842   -0.080397    11.00000   -1.20000
AFIX   0
C182  1    0.331694    0.288916   -0.042253    11.00000    0.08821
AFIX  43
H18C  2    0.286597    0.287292   -0.037032    11.00000   -1.20000
AFIX   0
C183  1    0.368455    0.228690   -0.020903    11.00000    0.05280
AFIX  43
H18D  2    0.348852    0.187990   -0.001511    11.00000   -1.20000
AFIX   0
C184  1    0.431889    0.232340   -0.029529    11.00000    0.05188
C185  1    0.295298    0.263342    0.206599    11.00000    0.06504
AFIX  43
H18E  2    0.285381    0.242257    0.250124    11.00000   -1.20000
AFIX   0
C186  1    0.240020    0.300939    0.192592    11.00000    0.06374
AFIX  43
H18F  2    0.194768    0.300569    0.221111    11.00000   -1.20000
AFIX   0
C187  1    0.264025    0.341230    0.125992    11.00000    0.07071
AFIX  43
H18G  2    0.232579    0.371931    0.109658    11.00000   -1.20000
AFIX   0
C188  1    0.329525    0.336970    0.085960    11.00000    0.09235
AFIX  43
H18H  2    0.343718    0.364067    0.043141    11.00000   -1.20000
AFIX   0
C189  1    0.376552    0.288227    0.112884    11.00000    0.07778
AFIX  43
H18I  2    0.422003    0.283159    0.086483    11.00000   -1.20000
AFIX   0
C190  1    0.565747    0.329598    0.252005    11.00000    0.07544
AFIX  43
H19B  2    0.531718    0.363280    0.259653    11.00000   -1.20000
AFIX   0
C191  1    0.630181    0.341447    0.233252    11.00000    0.07703
AFIX  43
H19C  2    0.642164    0.382763    0.225870    11.00000   -1.20000
AFIX   0
C192  1    0.679984    0.288403    0.224952    11.00000    0.08411
AFIX  43
H19D  2    0.724970    0.293386    0.217529    11.00000   -1.20000
AFIX   0
C193  1    0.668818    0.241072    0.226728    11.00000    0.06372
AFIX  43
H19E  2    0.704157    0.209144    0.216894    11.00000   -1.20000
AFIX   0
C194  1    0.603875    0.230982    0.243206    11.00000    0.06541
AFIX  43
H19F  2    0.596116    0.191411    0.243035    11.00000   -1.20000
AFIX   0
C195  1    0.296893    0.265862    0.496640    11.00000    0.07006
AFIX  43
H19G  2    0.286099    0.302639    0.464924    11.00000   -1.20000
AFIX   0
C196  1    0.242503    0.238101    0.550180    11.00000    0.11171
AFIX  43
H19H  2    0.196262    0.250968    0.556397    11.00000   -1.20000
AFIX   0
C197  1    0.266463    0.190377    0.591206    11.00000    0.10339
AFIX  43
H19I  2    0.235606    0.165516    0.630117    11.00000   -1.20000
AFIX   0
C198  1    0.333659    0.176169    0.579111    11.00000    0.11109
AFIX  43
H19J  2    0.347751    0.142794    0.610767    11.00000   -1.20000
AFIX   0
C199  1    0.382974    0.208079    0.522606    11.00000    0.07886
AFIX  43
H19K  2    0.430008    0.199637    0.514196    11.00000   -1.20000
AFIX   0
C200  1    1.176007    0.216179    0.125928    11.00000    0.04148
AFIX  43
H20B  2    1.185341    0.237050    0.082476    11.00000   -1.20000
AFIX   0
C201  1    1.235140    0.181896    0.142593    11.00000    0.05121
AFIX  43
H20C  2    1.278101    0.180354    0.111005    11.00000   -1.20000
AFIX   0
C202  1    1.227751    0.153702    0.201246    11.00000    0.05916
AFIX  43
H20D  2    1.262403    0.128877    0.216289    11.00000   -1.20000
AFIX   0
C203  1    1.163686    0.165011    0.237330    11.00000    0.08659
AFIX  43
H20E  2    1.153416    0.149366    0.280935    11.00000   -1.20000
AFIX   0
C204  1    1.113858    0.195963    0.217393    11.00000    0.06130
AFIX  43
H20F  2    1.070951    0.200036    0.248142    11.00000   -1.20000
AFIX   0
C205  1    0.895346    0.319727    0.001756    11.00000    0.04372
AFIX  43
H20G  2    0.928631    0.349467   -0.028398    11.00000   -1.20000
AFIX   0
C206  1    0.833006    0.332885    0.006224    11.00000    0.05717
AFIX  43
H20H  2    0.822562    0.373696   -0.022087    11.00000   -1.20000
AFIX   0
C207  1    0.785844    0.298294    0.043131    11.00000    0.11320
AFIX  43
H20I  2    0.741318    0.312402    0.043601    11.00000   -1.20000
AFIX   0
C208  1    0.800752    0.235751    0.085472    11.00000    0.08258
AFIX  43
H20J  2    0.768035    0.205023    0.114391    11.00000   -1.20000
AFIX   0
C209  1    0.870131    0.224329    0.079695    11.00000    0.06070
AFIX  43
H20K  2    0.884530    0.185186    0.107066    11.00000   -1.20000
AFIX   0
C210  1    1.100291    0.166097   -0.157997    11.00000    0.07272
AFIX  43
H21B  2    1.054069    0.158187   -0.141497    11.00000   -1.20000
AFIX   0
C211  1    1.146380    0.124902   -0.184082    11.00000    0.07802
AFIX  43
H21C  2    1.134288    0.086728   -0.183271    11.00000   -1.20000
AFIX   0
C212  1    1.213614    0.142130   -0.212611    11.00000    0.10163
AFIX  43
H21D  2    1.249311    0.115774   -0.231840    11.00000   -1.20000
AFIX   0
C213  1    1.224457    0.194832   -0.211471    11.00000    0.11209
AFIX  43
H21E  2    1.269826    0.206188   -0.230988    11.00000   -1.20000
AFIX   0
C214  1    1.177243    0.236767   -0.184920    11.00000    0.06363
AFIX  43
H21F  2    1.187681    0.276974   -0.188187    11.00000   -1.20000
AFIX  66
N1S   4    0.172721    0.381994    0.606836    11.00000   21.00000
C1S   1    0.215099    0.411854    0.545752    11.00000   21.00000
AFIX  43
H1S   2    0.196586    0.440111    0.515236    11.00000   -1.20000
AFIX  65
C2S   1    0.284565    0.400371    0.529317    11.00000   21.00000
AFIX  43
H2S   2    0.313528    0.420779    0.487569    11.00000   -1.20000
AFIX  65
C3S   1    0.311653    0.359027    0.573966    11.00000   21.00000
AFIX  43
H3S   2    0.359129    0.351178    0.562734    11.00000   -1.20000
AFIX  65
C4S   1    0.269275    0.329166    0.635050    11.00000   21.00000
AFIX  43
H4S   2    0.287789    0.300909    0.665565    11.00000   -1.20000
AFIX  65
C5S   1    0.199810    0.340649    0.651486    11.00000   21.00000
AFIX  43
H5S   2    0.170847    0.320240    0.693234    11.00000   -1.20000
AFIX  66
N2S   4    0.078962    0.275484    0.497916    11.00000   31.00000
C6S   1    0.108567    0.334745    0.466754    11.00000   31.00000
AFIX  43
H6S   2    0.138114    0.345949    0.424415    11.00000   -1.20000
AFIX  65
C7S   1    0.094941    0.377615    0.497539    11.00000   31.00000
AFIX  43
H7S   2    0.115175    0.418117    0.476240    11.00000   -1.20000
AFIX  65
C8S   1    0.051710    0.361223    0.559486    11.00000   31.00000
AFIX  43
H8S   2    0.042397    0.390523    0.580526    11.00000   -1.20000
AFIX  65
C9S   1    0.022104    0.301962    0.590649    11.00000   31.00000
AFIX  43
H9S   2   -0.007443    0.290759    0.632988    11.00000   -1.20000
AFIX  65
C10S  1    0.035730    0.259092    0.559865    11.00000   31.00000
AFIX  43
H10S  2    0.015496    0.218590    0.581163    11.00000   -1.20000
AFIX  66
N3S   4    0.626087    0.689036    0.286730    11.00000   41.00000
C11S  1    0.680874    0.642757    0.283172    11.00000   41.00000
AFIX  43
H11S  2    0.692177    0.617695    0.318967    11.00000   -1.20000
AFIX  65
C12S  1    0.719123    0.633146    0.227240    11.00000   41.00000
AFIX  43
H12S  2    0.756567    0.601516    0.224808    11.00000   -1.20000
AFIX  65
C13S  1    0.702584    0.669815    0.174866    11.00000   41.00000
AFIX  43
H13S  2    0.728726    0.663246    0.136639    11.00000   -1.20000
AFIX  65
C14S  1    0.647797    0.716094    0.178423    11.00000   41.00000
AFIX  43
H14S  2    0.636494    0.741155    0.142628    11.00000   -1.20000
AFIX  65
C15S  1    0.609548    0.725705    0.234355    11.00000   41.00000
AFIX  43
H15S  2    0.572103    0.757335    0.236786    11.00000   -1.20000
AFIX  66
N4S   4    0.669884    0.051208    0.276589    11.00000   51.00000
C16S  1    0.685323    0.048989    0.218406    11.00000   51.00000
AFIX  43
H16S  2    0.650636    0.044905    0.207409    11.00000   -1.20000
AFIX  65
C17S  1    0.751512    0.052745    0.176314    11.00000   51.00000
AFIX  43
H17S  2    0.762064    0.051229    0.136549    11.00000   -1.20000
AFIX  65
C18S  1    0.802264    0.058720    0.192403    11.00000   51.00000
AFIX  43
H18S  2    0.847502    0.061288    0.163635    11.00000   -1.20000
AFIX  65
C19S  1    0.786827    0.060939    0.250586    11.00000   51.00000
AFIX  43
H19S  2    0.821514    0.065023    0.261582    11.00000   -1.20000
AFIX  65
C20S  1    0.720637    0.057183    0.292679    11.00000   51.00000
AFIX  43
H20S  2    0.710087    0.058699    0.332444    11.00000   -1.20000
AFIX  66
N5S   4    0.075937    0.525241    0.127000    11.00000   61.00000
C21S  1    0.049099    0.523878    0.086866    11.00000   61.00000
AFIX  43
H21S  2    0.036950    0.563665    0.058546    11.00000   -1.20000
AFIX  65
C22S  1    0.040035    0.464299    0.088170    11.00000   61.00000
AFIX  43
H22S  2    0.021692    0.463367    0.060741    11.00000   -1.20000
AFIX  65
C23S  1    0.057811    0.406084    0.129608    11.00000   61.00000
AFIX  43
H23S  2    0.051616    0.365364    0.130499    11.00000   -1.20000
AFIX  65
C24S  1    0.084650    0.407447    0.169741    11.00000   61.00000
AFIX  43
H24S  2    0.096799    0.367659    0.198062    11.00000   -1.20000
AFIX  65
C25S  1    0.093713    0.467025    0.168438    11.00000   61.00000
AFIX  43
H25S  2    0.112056    0.467956    0.195868    11.00000   -1.20000

AFIX   0
HKLF 4 1  1.0000  0.0000  0.0000  0.0000  1.0000  0.0000  0.0000  0.0000  1.0000

REM  test in P-1                      P-1
REM R1 =  0.2020 for    9603 Fo > 4sig(Fo)  and  0.2602 for all   16264 data
REM   1296 parameters refined using     32 restraints

END

WGHT      0.0011   1401.8085

REM Highest difference peak  1.308,  deepest hole -1.149,  1-sigma level  0.218
Q1    1   1.0566  0.2210  0.1008  11.00000  0.05    1.31
Q2    1   1.0280  0.0984  0.2639  11.00000  0.05    1.31
Q3    1   1.0022  0.1575  0.0703  11.00000  0.05    1.21
Q4    1   0.8796  0.2730 -0.2626  11.00000  0.05    1.17
Q5    1   0.4172  0.1522  0.2599  11.00000  0.05    1.13
Q6    1   0.9176  0.1079  0.4618  11.00000  0.05    1.11
Q7    1   1.0210  0.1436  0.1996  11.00000  0.05    1.11
Q8    1   0.4567  0.3350  0.3402  11.00000  0.05    1.11
Q9    1   0.6581  0.2977  0.4683  11.00000  0.05    1.10
Q10   1   1.0587  0.1368  0.1005  11.00000  0.05    1.10
;
_shelx_res_checksum   73969

_shelx_hkl_file
;
   3   0   0   65334    7569                                                       75252   11.19   -0.19  1.0000
   4   0   0  253589   25757                                                      260114    3.85   -0.14  1.0000
   5   0   0  100728   11119                                                      109129   -7.75    0.27  1.0000
  -9   0   0   35872    4260                                                       39536    5.64    0.08  1.0000
   9   0   0   33768    4780                                                       37326    5.64   -0.08  1.0000
  10   0   0   93575   10179                                                       96450   -2.79    0.20  1.0000
 -11   0   0       0    2030                                                           0    0.27    0.22  1.0000
  11   0   0       0    2770                                                           0    0.27   -0.22  1.0000
 -13   0   0    3148    2040                                                        3430    1.47    0.14  1.0000
  13   0   0    6594    2950                                                        6999    1.47   -0.14  1.0000
  14   0   0   12790    3270                                                       12439   -0.93    0.22  1.0000
 -15   0   0   60039    5829                                                       60254   -0.26    0.02  1.0000
 -16   0   0       0    2050                                                           0    0.41    0.05  1.0000
  16   0   0       0    3350                                                           0    0.41   -0.05  1.0000
 -17   0   0    4091    2110                                                        3990    0.48    0.01  1.0000
  17   0   0       1    3700                                                           0    0.48   -0.01  1.0000
 -18   0   0      29    1840                                                           0    3.23   -0.04  1.0000
  18  -1   0      21    3810                                                           0   -2.73   -0.03  1.0000
 -18   1   0      21    2030                                                           0   -2.73    0.03  1.0000
  17  -1   0     862    3790                                                         970    1.06    0.04  1.0000
 -17   1   0     162    2130                                                         210    1.06   -0.04  1.0000
  16  -1   0       0    3880                                                           0   -0.29    0.08  1.0000
 -16   1   0     980    1760                                                         950   -0.29   -0.08  1.0000
  15  -1   0    2627    3700                                                        2290    2.03   -0.04  1.0000
 -15   1   0    4283    1770                                                        3850    2.03    0.04  1.0000
  14  -1   0    2292    3220                                                        2060   -1.49   -0.18  1.0000
  13  -1   0   56433    6569                                                       54845   -2.01    0.13  1.0000
  12  -1   0   46155    5649                                                       44706   -2.03   -0.16  1.0000
  11  -1   0    1506    2680                                                        1390   -0.91    0.18  1.0000
 -11   1   0    6502    1890                                                        6259   -0.91   -0.18  1.0000
 -10   1   0   78223    7079                                                       78992    0.82    0.11  1.0000
  -8   1   0   24184    3230                                                       30077   10.71   -0.18  1.0000
   7  -1   0  170791   17228                                                      172163    0.99    0.04  1.0000
   5  -1   0  259077   25807                                                      260244    0.68   -0.24  1.0000
   3   1   0   82366   10539                                                      105819  -22.90    0.46  1.0000
  -9  -1   0    5791    2060                                                        4820   -3.99   -0.05  1.0000
   9   1   0    1160    3010                                                         750   -3.99    0.05  1.0000
  10   1   0   45023    5739                                                       41976    4.37   -0.18  1.0000
 -11  -1   0    1512    1840                                                        1900   -2.81   -0.19  1.0000
  11   1   0    2736    3010                                                        3250   -2.81    0.19  1.0000
  13   1   0    1938    3020                                                        1770    1.16    0.14  1.0000
  15   1   0   20532    4320                                                       20858    0.68    0.08  1.0000
 -16  -1   0    2281    2040                                                        2640    2.17   -0.09  1.0000
  16   1   0      13    3050                                                           0    2.17    0.09  1.0000
 -17  -1   0    8252    1970                                                        7979   -0.90    0.02  1.0000
  17   1   0     687    3300                                                         610   -0.90   -0.02  1.0000
 -18  -1   0       9    1790                                                           0   -1.75   -0.05  1.0000
 -19  -1   0     215    1630                                                         270    1.05    0.01  1.0000
  18  -2   0    3674    4270                                                        3220    2.31    0.04  1.0000
 -18   2   0    8581    2280                                                        7879    2.31   -0.04  1.0000
 -16   2   0     656    1760                                                         780   -1.38    0.03  1.0000
 -15   2   0   43694    4690                                                       42566   -1.62    0.04  1.0000
  14  -2   0       1    3510                                                           0   -0.43    0.18  1.0000
 -14   2   0       1    2040                                                           0   -0.43   -0.18  1.0000
 -12   2   0   84463    7909                                                       87101    2.69   -0.01  1.0000
  11  -2   0       1    3140                                                           0    0.70   -0.08  1.0000
 -11   2   0    2169    1300                                                        2280    0.70    0.08  1.0000
 -10   2   0   93548    8259                                                       93931    0.37   -0.07  1.0000
   9  -2   0   12025    3400                                                       12429    1.09    0.13  1.0000
   8  -2   0   28303    3840                                                       23628   -8.68   -0.20  1.0000
   4  -2   0   98740    9419                                                       92881    5.66   -0.14  1.0000
   3  -2   0  164593   14429                                                      144985   14.91   -0.12  1.0000
  -4  -2   0  202059   16888                                                      175662  -18.17   -0.17  1.0000
   4   2   0  248439   19588                                                      219068  -18.17    0.17  1.0000
  -7  -2   0   84742    9199                                                       88411   -3.73    0.03  1.0000
   7   2   0  113213   10419                                                      117448   -3.73   -0.03  1.0000
  -8  -2   0    2172    1660                                                        1420   -5.34    0.03  1.0000
   9   2   0   75028    7659                                                       71393    4.02   -0.15  1.0000
 -10  -2   0   75680    7429                                                       72973   -2.97   -0.19  1.0000
  10   2   0   91571    8729                                                       88591   -2.97    0.19  1.0000
 -11  -2   0   25954    3520                                                       25317    1.19    0.13  1.0000
  11   2   0   29719    4520                                                       29037    1.19   -0.13  1.0000
 -12  -2   0   77932    7799                                                       84702    7.10   -0.09  1.0000
 -13  -2   0  112629   10429                                                      116238   -3.19    0.01  1.0000
 -14  -2   0     226    2110                                                         180    0.96   -0.05  1.0000
  14   2   0       3    3160                                                           0    0.96    0.05  1.0000
 -15  -2   0    5935    2100                                                        6049    0.44   -0.10  1.0000
  15   2   0    2841    3180                                                        2920    0.44    0.10  1.0000
 -16  -2   0     565    1850                                                         530   -0.45    0.12  1.0000
  16   2   0       1    3340                                                           0   -0.45   -0.12  1.0000
 -17  -2   0       1    1770                                                           0   -0.67   -0.07  1.0000
  17   2   0       1    3150                                                           0   -0.67    0.07  1.0000
 -18  -2   0    2631    1670                                                        2740    0.63    0.08  1.0000
 -19  -2   0    2921    1690                                                        2680   -1.36    0.03  1.0000
  18  -3   0    1265    4610                                                        1540   -2.20   -0.07  1.0000
 -18   3   0   11555    3050                                                       12359   -2.20    0.07  1.0000
  17  -3   0      20    4180                                                           0   -2.70    0.11  1.0000
 -17   3   0     675    1740                                                         930   -2.70   -0.11  1.0000
  16  -3   0      21    4130                                                           0    2.74   -0.01  1.0000
 -16   3   0    2721    1940                                                        3220    2.74    0.01  1.0000
 -15   3   0   17367    3410                                                       16898   -1.07    0.04  1.0000
  14  -3   0    2557    3730                                                        2360    1.19   -0.13  1.0000
 -14   3   0   10236    2230                                                        9839    1.19    0.13  1.0000
  12  -3   0    2554    3400                                                        2840   -1.65   -0.01  1.0000
  11  -3   0    3146    3120                                                        2660    2.70    0.01  1.0000
  10  -3   0   11280    3170                                                       11619   -0.95   -0.09  1.0000
   9  -3   0    2105    2820                                                        2430   -2.04   -0.05  1.0000
   8  -3   0   12016    3540                                                       14219    5.76    0.22  1.0000
   7  -3   0   85646    9089                                                       84972    0.69   -0.02  1.0000
   7  -3   0  119023   10569                                                      118228    0.69   -0.02  1.0000
   4  -3   0   88347   10079                                                       98890  -10.31    0.07  1.0000
   3  -3   0  104771   10709                                                      106419   -1.52    0.11  1.0000
  -2   3   0    3486    1630                                                        7759   17.37    0.09  1.0000
   0   3   0   98234    4650                                                       47695  -56.83    0.30  1.0000
   1   3   0    1400    1170                                                        3550   13.26    0.09  1.0000
  -3  -3   0  129467    9109                                                      106009  -20.47   -0.32  1.0000
  -7  -3   0  117524   12839                                                      127517    8.54    0.03  1.0000
   7   3   0  155277   14789                                                      166733    8.54   -0.03  1.0000
   8   3   0   20336    3390                                                       21108    1.60    0.06  1.0000
  10   3   0   30177    4300                                                       31757    2.68   -0.09  1.0000
  11   3   0       0    2750                                                           0   -0.30   -0.05  1.0000
  12   3   0   34407    4730                                                       29927   -7.47    0.15  1.0000
  13   3   0    7776    3400                                                        6149    5.84   -0.04  1.0000
 -14  -3   0       1    1770                                                           0    0.65   -0.02  1.0000
 -15  -3   0    3281    1810                                                        3350   -0.36    0.04  1.0000
  15   3   0       0    3160                                                           0   -0.36   -0.04  1.0000
 -16  -3   0       1    1700                                                           0    0.63   -0.07  1.0000
  17   3   0       1    3420                                                           0    0.41   -0.12  1.0000
 -18  -3   0     502    1690                                                         750   -2.97   -0.14  1.0000
  18   3   0      25    3330                                                           0   -2.97    0.14  1.0000
 -18   4   0     720    1810                                                         920    2.09   -0.01  1.0000
  17  -4   0       5    4230                                                           0    1.37   -0.10  1.0000
 -17   4   0    2994    1790                                                        3250    1.37    0.10  1.0000
  16  -4   0      42    3970                                                           0   -3.86    0.02  1.0000
 -16   4   0    1305    1960                                                         880   -3.86   -0.02  1.0000
 -15   4   0   29444    4060                                                       29997    0.96   -0.07  1.0000
 -14   4   0     969    1910                                                         970   -0.01   -0.04  1.0000
  13  -4   0      40    3770                                                           0    3.78   -0.11  1.0000
 -13   4   0      40    1420                                                           0    3.78    0.11  1.0000
  12  -4   0   44785    6919                                                       44456    0.47    0.05  1.0000
 -12   4   0   59935    4960                                                       59554    0.47   -0.05  1.0000
  11  -4   0   40591    5759                                                       39966   -0.93    0.06  1.0000
  10  -4   0    6563    3300                                                        5739    3.14    0.01  1.0000
   9  -4   0     719    2090                                                         760    0.45    0.02  1.0000
   8  -4   0   28107    3350                                                       23378   -8.82   -0.12  1.0000
   7  -4   0   52711    6039                                                       52255   -0.59    0.09  1.0000
   7  -4   0   50712    5259                                                       50265   -0.59    0.09  1.0000
   6  -4   0     203    2190                                                         120    1.96    0.06  1.0000
   5  -4   0  172136   17048                                                      170533   -1.16    0.04  1.0000
   3  -4   0  109416    8609                                                      101720   -7.08   -0.17  1.0000
  -3   4   0  103158    9939                                                       95690   -7.08    0.17  1.0000
  -2   4   0      65    1090                                                           0   -4.83    0.03  1.0000
  -1   4   0  113366   11709                                                      117138   -3.32    0.08  1.0000
   1   4   0  131974   13839                                                      123858   -6.79    0.00  1.0000
   1   4   0  179027   14549                                                      169553   -6.79    0.00  1.0000
  -2  -4   0  120412    9519                                                      111199   -8.10   -0.24  1.0000
  -8  -4   0   62362    6839                                                       63644    1.53    0.21  1.0000
   8   4   0   83964    7929                                                       85451    1.53   -0.21  1.0000
   9   4   0   16388    3380                                                       15778   -1.44    0.04  1.0000
 -10  -4   0    9594    1940                                                       10419   -2.46   -0.08  1.0000
  11   4   0   12056    3050                                                       12619    1.51    0.06  1.0000
 -12  -4   0     170    1740                                                           0    7.79    0.01  1.0000
  12   4   0    2341    2700                                                        1250    7.79   -0.01  1.0000
  13   4   0    7340    3220                                                        5949   -5.11   -0.01  1.0000
 -14  -4   0       0    1630                                                           0   -0.18    0.06  1.0000
 -15  -4   0   10572    2540                                                       10729   -0.45   -0.06  1.0000
  15   4   0     767    3650                                                         810   -0.45    0.06  1.0000
 -16  -4   0    2361    1720                                                        1970   -2.52    0.07  1.0000
 -17  -4   0      10    1700                                                           0   -1.94   -0.09  1.0000
  18   4   0    1685    3490                                                        1410    2.09   -0.20  1.0000
  17  -5   0       1    4750                                                           0   -0.66    0.06  1.0000
  16  -5   0       6    4530                                                           0    1.46    0.01  1.0000
 -16   5   0    2490    2030                                                        2740    1.46   -0.01  1.0000
  15  -5   0    2271    4340                                                        2110    1.03   -0.03  1.0000
 -15   5   0    2188    2050                                                        2030    1.03    0.03  1.0000
  14  -5   0   10595    4260                                                       10419   -0.51   -0.01  1.0000
 -14   5   0   15029    2530                                                       14819   -0.51    0.01  1.0000
 -13   5   0    1176    1180                                                        1160   -0.14   -0.02  1.0000
  12  -5   0    4715    3630                                                        4240   -2.12    0.03  1.0000
  11  -5   0       2    3440                                                           0    0.80   -0.12  1.0000
  10  -5   0    7594    2130                                                        6549   -3.72   -0.02  1.0000
  10  -5   0      39    3280                                                           0   -3.72   -0.02  1.0000
   9  -5   0    3094    3100                                                        3190    0.51    0.02  1.0000
   9  -5   0    2690    1870                                                        2780    0.51    0.02  1.0000
   7  -5   0  154915   15168                                                      153245   -1.27   -0.11  1.0000
   7  -5   0  146077   12989                                                      144456   -1.27   -0.11  1.0000
   6  -5   0       1    2370                                                           0    0.70    0.08  1.0000
   6  -5   0     411    1980                                                         460    0.70    0.08  1.0000
   5  -5   0  130899   13659                                                      135466    3.74   -0.15  1.0000
   4  -5   0      52    1440                                                           0   -4.30   -0.15  1.0000
   3  -5   0    8414    1890                                                        8029   -1.27    0.24  1.0000
  -3   5   0   11806    2210                                                       11349   -1.27   -0.24  1.0000
  -2   5   0   19211    2680                                                       19278   -0.15    0.03  1.0000
  -1   5   0   34653    3850                                                       33467    1.92    0.08  1.0000
   0  -5   0   50315    3720                                                       44276   -8.31   -0.15  1.0000
   0   5   0   41782    4610                                                       36296   -8.31    0.15  1.0000
  -1  -5   0   90713    6869                                                       80272  -10.68   -0.07  1.0000
   1   5   0   89374    7849                                                       79012  -10.68    0.07  1.0000
  -3  -5   0  168034   13089                                                      152555   11.56   -0.13  1.0000
  -5  -5   0   86178    7509                                                       84602    1.61   -0.22  1.0000
  -6  -5   0    4480    1290                                                        3270   -5.83    0.13  1.0000
  -7  -5   0   42964    3720                                                       40296    3.91    0.04  1.0000
   7   5   0   36202    4860                                                       33757    3.91   -0.04  1.0000
  -8  -5   0    9323    1510                                                        8559   -2.42   -0.25  1.0000
   8   5   0    7345    2330                                                        6669   -2.42    0.25  1.0000
 -12  -5   0    2852    1640                                                        3770   -4.78   -0.07  1.0000
  12   5   0     937    2470                                                        1490   -4.78    0.07  1.0000
  14   5   0       2    3090                                                           0   -0.77    0.07  1.0000
  15   5   0       0    3660                                                           0    0.36   -0.09  1.0000
 -16  -5   0     576    1790                                                         710   -1.58    0.00  1.0000
  16   5   0       7    3680                                                           0   -1.58    0.00  1.0000
 -17  -5   0       6    2000                                                           0    1.46    0.06  1.0000
  17   5   0       6    3450                                                           0    1.46   -0.06  1.0000
 -18  -5   0       4    2090                                                           0   -1.17   -0.10  1.0000
  18   5   0       4    3470                                                           0   -1.17    0.10  1.0000
  17  -6   0       3    5199                                                           0    0.98   -0.04  1.0000
 -17   6   0       3    1810                                                           0    0.98    0.04  1.0000
  16  -6   0       3    4870                                                           0   -1.00   -0.02  1.0000
 -16   6   0       3    2080                                                           0   -1.00    0.02  1.0000
 -15   6   0   29684    3860                                                       30117   -0.75   -0.08  1.0000
  14  -6   0       4    4420                                                           0    1.13   -0.01  1.0000
 -14   6   0    1250    1180                                                        1120    1.13    0.01  1.0000
  11  -6   0   27351    3620                                                       29577   -3.95    0.14  1.0000
  11  -6   0   26466    5339                                                       28657   -3.95    0.14  1.0000
  10  -6   0   22506    4750                                                       20438    4.22    0.03  1.0000
  10  -6   0   26747    2960                                                       24488    4.22    0.03  1.0000
   9  -6   0    1272    3220                                                        1470   -1.60   -0.03  1.0000
   9  -6   0    7267    1990                                                        7729   -1.60   -0.03  1.0000
   8  -6   0   98963    9949                                                      102790   -3.60    0.01  1.0000
   8  -6   0  117137   11689                                                      121298   -3.60    0.01  1.0000
   7  -6   0    4651    1930                                                        5029    1.63    0.07  1.0000
   7  -6   0       7    2600                                                           0    1.63    0.07  1.0000
   6  -6   0   87764    8019                                                       89391   -1.64   -0.02  1.0000
   5  -6   0    3668    1620                                                        3740   -0.35    0.14  1.0000
  -5   6   0       0    1410                                                           0   -0.35   -0.14  1.0000
   4  -6   0      74    1190                                                           0    5.15    0.01  1.0000
  -4   6   0    2448    1270                                                        1670    5.15   -0.01  1.0000
   3  -6   0  102072    9419                                                      102040   -0.03   -0.17  1.0000
  -3   6   0  116152   11009                                                      116118   -0.03    0.17  1.0000
   1  -6   0   14637    1640                                                       13169   -3.72    0.05  1.0000
  -5  -6   0      18    1440                                                           0    2.51    0.18  1.0000
  -6  -6   0   43847    4040                                                       43796    0.07   -0.30  1.0000
   6   6   0   37473    5099                                                       37426    0.07    0.30  1.0000
   7   6   0    2109    2680                                                        2160   -0.33   -0.17  1.0000
  -8  -6   0   10974    1860                                                       11599   -1.76    0.16  1.0000
   8   6   0    6622    2850                                                        7109   -1.76   -0.16  1.0000
  -9  -6   0     826    1540                                                         760   -0.70   -0.13  1.0000
 -10  -6   0       0    1610                                                           0    0.23   -0.03  1.0000
  10   6   0       0    2670                                                           0    0.23    0.03  1.0000
 -11  -6   0    1681    1730                                                        1860   -1.28   -0.08  1.0000
  11   6   0    3002    2650                                                        3240   -1.28    0.08  1.0000
  12   6   0    2168    2320                                                        1520    4.53   -0.09  1.0000
 -13  -6   0    4748    1910                                                        5739   -4.09    0.03  1.0000
 -14  -6   0       8    1930                                                           0   -1.71    0.00  1.0000
  14   6   0     337    2850                                                         450   -1.71    0.00  1.0000
 -15  -6   0      10    2050                                                           0   -1.86    0.08  1.0000
  15   6   0      10    3300                                                           0   -1.86   -0.08  1.0000
  16   6   0       8    3760                                                           0    1.65    0.05  1.0000
 -17  -6   0    5337    2390                                                        6259   -3.63   -0.12  1.0000
  17   6   0      37    3810                                                           0   -3.63    0.12  1.0000
 -18  -6   0      18    2330                                                           0    2.57    0.11  1.0000
  18   6   0      18    3580                                                           0    2.57   -0.11  1.0000
  16  -7   0      64    4980                                                           0    4.79    0.02  1.0000
  15  -7   0    4122    4860                                                        3990   -0.62   -0.05  1.0000
 -15   7   0    5288    1710                                                        5139   -0.62    0.05  1.0000
 -14   7   0   17825    2520                                                       19228   -3.08    0.02  1.0000
  13  -7   0      30    4110                                                           0   -3.27    0.04  1.0000
  12  -7   0      17    3760                                                           0    2.48   -0.04  1.0000
  10  -7   0   12168    2590                                                       15228   -7.83   -0.08  1.0000
   9  -7   0   10414    2680                                                       11899    4.20    0.15  1.0000
   9  -7   0     988    3060                                                        1480    4.20    0.15  1.0000
   8  -7   0   35155    3860                                                       32537    4.26   -0.10  1.0000
   7  -7   0    3061    1850                                                        3020    0.22   -0.05  1.0000
   6  -7   0    2003    1680                                                        1550    3.22    0.00  1.0000
  -6   7   0    1763    1630                                                        1340    3.22    0.00  1.0000
   4  -7   0   47413    5599                                                       52575   -6.91   -0.02  1.0000
  -4   7   0   65078    6539                                                       71103   -6.91    0.02  1.0000
   3  -7   0   35986    3560                                                       37856    2.91    0.03  1.0000
   1  -7   0       1     770                                                           0   -0.44   -0.02  1.0000
   0  -7   0   18964    2020                                                       17558    3.11   -0.09  1.0000
   0   7   0   17508    3500                                                       16158    3.11    0.09  1.0000
  -1  -7   0   11084    2010                                                       14499   -9.05   -0.05  1.0000
   1   7   0   11723    3180                                                       15228   -9.05    0.05  1.0000
  -3  -7   0   14585    1730                                                       11659    7.65    0.12  1.0000
  -4  -7   0    3570     950                                                        3540    0.15   -0.06  1.0000
  -6  -7   0   33052    3740                                                       32027    1.70    0.22  1.0000
  -7  -7   0     429    1630                                                         720   -3.66   -0.11  1.0000
  -8  -7   0   28562    3250                                                       28337    0.40   -0.23  1.0000
   8   7   0   18228    4230                                                       18048    0.40    0.23  1.0000
  10   7   0   22429    3510                                                       21698    1.47    0.04  1.0000
  11   7   0    2387    2850                                                        2650    1.57   -0.03  1.0000
 -12  -7   0      37    2020                                                           0   -3.62    0.05  1.0000
 -13  -7   0    1399    2070                                                        1550    1.17   -0.02  1.0000
 -14  -7   0     129    2160                                                         160    0.78   -0.04  1.0000
  14   7   0       2    2570                                                           0    0.78    0.04  1.0000
 -15  -7   0    1298    2340                                                        1280   -0.15   -0.07  1.0000
  15   7   0       0    3220                                                           0   -0.15    0.07  1.0000
 -16  -7   0    8698    2420                                                        8369   -1.06    0.09  1.0000
  16   7   0       3    3550                                                           0   -1.06   -0.09  1.0000
 -17  -7   0      69    2340                                                           0    4.96    0.11  1.0000
  17   7   0      69    3840                                                           0    4.96   -0.11  1.0000
 -18  -7   0    8137    2450                                                        7499   -2.16   -0.14  1.0000
  16  -8   0      77    4860                                                         170   -2.57   -0.06  1.0000
 -16   8   0     170    2200                                                         300   -2.57    0.06  1.0000
 -15   8   0   23460    3090                                                       23558    0.19    0.05  1.0000
  14  -8   0      33    4330                                                           0    3.44    0.08  1.0000
  12  -8   0      15    3810                                                           0   -2.32    0.00  1.0000
  11  -8   0   15171    2640                                                       16628    3.46    0.10  1.0000
  10  -8   0   38473    4300                                                       41446    4.45    0.12  1.0000
   9  -8   0    9457    2670                                                       11179   -5.07   -0.15  1.0000
   8  -8   0   61288    6359                                                       63674    2.85    0.12  1.0000
  -8   8   0   69592    7399                                                       72133    2.85   -0.12  1.0000
   7  -8   0    5539    1700                                                        5359   -0.73    0.06  1.0000
  -7   8   0    4258    1910                                                        4100   -0.73   -0.06  1.0000
   6  -8   0  111778   10959                                                      107349   -4.00   -0.11  1.0000
  -6   8   0  148793   12769                                                      143676   -4.00    0.11  1.0000
  -5   8   0   23819    3440                                                       24208    0.75   -0.12  1.0000
   4  -8   0   42809    3930                                                       40876    2.83    0.02  1.0000
   3  -8   0   21886    2490                                                       23818   -3.82   -0.02  1.0000
   2  -8   0   12648    1640                                                       13219    1.50    0.00  1.0000
   1  -8   0    4758     940                                                        3950   -3.66   -0.01  1.0000
  -1   8   0    4251    1810                                                        3490   -3.66    0.01  1.0000
   0   8   0    1180    1950                                                         850    3.10   -0.12  1.0000
  -1  -8   0    3606     920                                                        2550    5.71    0.07  1.0000
   1   8   0    5150    1800                                                        3870    5.71   -0.07  1.0000
  -2  -8   0    3228     890                                                        2480    4.19   -0.03  1.0000
   2   8   0    4401    1860                                                        3520    4.19    0.03  1.0000
  -3  -8   0   23876    2120                                                       18658  -10.72   -0.12  1.0000
  -4  -8   0  101901    8639                                                       99900    1.88    0.12  1.0000
   4   8   0  100912   10299                                                       98920    1.88   -0.12  1.0000
  -5  -8   0     395     980                                                         500    1.48    0.08  1.0000
  -6  -8   0      26    1310                                                           0   -3.02   -0.23  1.0000
   7   8   0       1    2980                                                           0    0.66   -0.10  1.0000
   9   8   0    8215    3040                                                        9209   -3.18    0.20  1.0000
  10   8   0   23463    3870                                                       23628   -0.32   -0.08  1.0000
 -13  -8   0   15187    3320                                                       15058   -0.31   -0.02  1.0000
 -14  -8   0     300    2170                                                         500   -3.01    0.03  1.0000
  14   8   0      25    2700                                                           0   -3.01   -0.03  1.0000
 -15  -8   0     981    2280                                                        1120    1.28    0.11  1.0000
  15   8   0       5    2770                                                           0    1.28   -0.11  1.0000
 -16  -8   0       7    2290                                                           0    1.52   -0.14  1.0000
  16   8   0       7    3300                                                           0    1.52    0.14  1.0000
 -17  -8   0    7523    2520                                                        7119   -1.41   -0.12  1.0000
  17   8   0       6    3780                                                           0   -1.41    0.12  1.0000
  10  -9   0    7154    2140                                                        5809   -5.00    0.01  1.0000
 -10   9   0    8282    2330                                                        6829   -5.00   -0.01  1.0000
   8  -9   0    5719    1900                                                        6659   -3.58   -0.09  1.0000
  -8   9   0     218    2000                                                         430   -3.58    0.09  1.0000
   7  -9   0   12220    2550                                                       14189    5.13   -0.04  1.0000
   6  -9   0   24014    2840                                                       20778    6.47    0.04  1.0000
   5  -9   0   16369    2590                                                       20308   -8.71   -0.14  1.0000
   4  -9   0   81737    8549                                                       83852   -2.20    0.06  1.0000
  -4   9   0  110047   10079                                                      112499   -2.20   -0.06  1.0000
   3  -9   0  299398   25827                                                      294191    2.86   -0.02  1.0000
  -3   9   0  317845   30117                                                      312479    2.86    0.02  1.0000
   2  -9   0  202955   18258                                                      201840    0.74   -0.08  1.0000
  -2   9   0  228420   21358                                                      227237    0.74    0.08  1.0000
  -1   9   0    1196    1980                                                        1530    2.71   -0.08  1.0000
   0  -9   0   40501    4070                                                       42196   -2.49   -0.06  1.0000
   0   9   0   38806    5369                                                       40466   -2.49    0.06  1.0000
   0   9   0   45234    4540                                                       47025   -2.49    0.06  1.0000
  -1  -9   0   39003    3890                                                       38646   -0.54   -0.10  1.0000
   1   9   0   41002    5009                                                       40636   -0.54    0.10  1.0000
   1   9   0   43784    4250                                                       43406   -0.54    0.10  1.0000
  -2  -9   0  195627   17378                                                      199350   -2.51    0.12  1.0000
   2   9   0  226135   19158                                                      230137   -2.51   -0.12  1.0000
   2   9   0  178861   20168                                                      182422   -2.51   -0.12  1.0000
  -3  -9   0  118800   10579                                                      124628    5.00    0.03  1.0000
   3   9   0  115569   12339                                                      121318    5.00   -0.03  1.0000
  -4  -9   0  130339   11279                                                      134727   -3.60   -0.03  1.0000
   4   9   0  122718   13319                                                      126977   -3.60    0.03  1.0000
  -5  -9   0   48950    5009                                                       48535   -0.56   -0.02  1.0000
   5   9   0   61530    6319                                                       61064   -0.56    0.02  1.0000
  -7  -9   0   34626    3490                                                       35576    1.52   -0.25  1.0000
   7   9   0   31540    5029                                                       32447    1.52    0.25  1.0000
  -8  -9   0      16    1640                                                           0   -2.38    0.00  1.0000
  -9  -9   0   10576    2130                                                       10999    1.22    0.21  1.0000
   9   9   0    8930    3300                                                        9319    1.22   -0.21  1.0000
 -10  -9   0    3150    2180                                                        3760    3.11   -0.18  1.0000
  10   9   0    3306    2810                                                        3930    3.11    0.18  1.0000
 -12  -9   0       0    2290                                                           0   -0.37    0.01  1.0000
  13   9   0       2    3030                                                           0   -0.80   -0.03  1.0000
 -14  -9   0      40    2520                                                           0    3.80    0.00  1.0000
  14   9   0      40    2780                                                           0    3.80    0.00  1.0000
 -15  -9   0      19    2630                                                           0   -2.62   -0.18  1.0000
 -16  -9   0      10    2750                                                           0    1.92    0.15  1.0000
  16   9   0      10    2930                                                           0    1.92   -0.15  1.0000
 -17  -9   0   33436    5039                                                       34737    2.11    0.14  1.0000
 -15  10   0   34115    5649                                                       33847    0.44    0.03  1.0000
 -14  10   0    2794    2960                                                        1820    6.10   -0.14  1.0000
 -13  10   0    7450    3020                                                        8649   -4.00    0.00  1.0000
  11 -10   0   28949    3140                                                       28197    1.33    0.14  1.0000
 -11  10   0   24449    4810                                                       23758    1.33   -0.14  1.0000
  10 -10   0   29254    3400                                                       25677    6.46    0.00  1.0000
   8 -10   0   21060    2850                                                       19868    2.49    0.00  1.0000
   7 -10   0   10985    2480                                                       12919   -5.30    0.08  1.0000
   6 -10   0   17870    2810                                                       22108   -8.98   -0.05  1.0000
   5 -10   0   61049    5599                                                       53585    9.33    0.05  1.0000
  -5  10   0   78203    6729                                                       69723    9.33   -0.05  1.0000
   3 -10   0  158267   15018                                                      166253   -5.93    0.12  1.0000
  -3  10   0  176728   17658                                                      185161   -5.93   -0.12  1.0000
   2 -10   0  200357   16938                                                      198760    1.07    0.10  1.0000
   1 -10   0  122618   10209                                                      118088    3.90   -0.21  1.0000
  -1  10   0  124003   11829                                                      119448    3.90    0.21  1.0000
  -1  10   0  122302   11609                                                      117778    3.90    0.21  1.0000
   0 -10   0   30604    3170                                                       31717   -1.89    0.18  1.0000
   0  10   0   23825    4730                                                       24808   -1.89   -0.18  1.0000
   0  10   0   32608    3480                                                       33757   -1.89   -0.18  1.0000
  -2 -10   0   16107    2310                                                       15478    1.50   -0.04  1.0000
   2  10   0   19572    3750                                                       18878    1.50    0.04  1.0000
   3  10   0    6801    2160                                                        8039   -4.30    0.03  1.0000
   4  10   0    2928    2430                                                        2890    0.21    0.07  1.0000
   5  10   0    6281    2930                                                        6999    2.63   -0.06  1.0000
  -6 -10   0   30257    3370                                                       31807   -2.63   -0.14  1.0000
  -7 -10   0       4    1110                                                           0    1.15    0.03  1.0000
  -8 -10   0    2229    1170                                                        1880    2.31   -0.05  1.0000
   8  10   0      15    2900                                                           0    2.31    0.05  1.0000
  -9 -10   0    1028    1500                                                        1260    2.06   -0.09  1.0000
   9  10   0     785    3010                                                         990    2.06    0.09  1.0000
 -10 -10   0   45464    4870                                                       39926   -8.02    0.09  1.0000
  10  10   0   56627    5729                                                       50425   -8.02   -0.09  1.0000
 -11 -10   0   17885    3190                                                       16308    3.61   -0.02  1.0000
  11  10   0   12723    3150                                                       11399    3.61    0.02  1.0000
 -12 -10   0     724    2100                                                         900   -1.85   -0.06  1.0000
  12  10   0      10    2840                                                           0   -1.85    0.06  1.0000
 -13 -10   0    7722    2620                                                        7809   -0.29   -0.03  1.0000
  13  10   0    1196    3300                                                        1230   -0.29    0.03  1.0000
 -14 -10   0       0    2650                                                           0    0.00    0.08  1.0000
  14  10   0       0    2950                                                           0    0.00   -0.08  1.0000
 -15 -10   0    1087    2740                                                        1500    3.44    0.13  1.0000
  15  10   0      33    2730                                                           0    3.44   -0.13  1.0000
 -16 -10   0       4    2840                                                           0   -1.13   -0.21  1.0000
  16  10   0       4    2790                                                           0   -1.13    0.21  1.0000
 -17 -10   0     888    2800                                                         790   -1.02   -0.06  1.0000
 -14  11   0    3994    3330                                                        4140   -0.69    0.16  1.0000
 -13  11   0   78758    8949                                                       75372    3.65   -0.04  1.0000
 -12  11   0    5702    2870                                                        6029    1.28   -0.12  1.0000
 -11  11   0   70436    8389                                                       73663   -3.60    0.20  1.0000
 -10  11   0   14375    3980                                                       15338    2.36    0.00  1.0000
   9 -11   0   51170    5039                                                       50615    0.74    0.03  1.0000
   8 -11   0   17157    2520                                                       14739   -5.73   -0.03  1.0000
   7 -11   0   26197    2960                                                       22408    7.27   -0.11  1.0000
   6 -11   0   15193    2720                                                       17648    5.73    0.12  1.0000
  -6  11   0   20492    3600                                                       23328    5.73   -0.12  1.0000
   5 -11   0    6660    2090                                                       10999  -13.91   -0.02  1.0000
  -5  11   0   10360    3330                                                       15638  -13.91    0.02  1.0000
  -4  11   0   12568    3440                                                       13519    2.49    0.07  1.0000
   3 -11   0  164584   15028                                                      173393    6.41   -0.04  1.0000
  -3  11   0  168860   17628                                                      177782    6.41    0.04  1.0000
   2 -11   0   21662    2340                                                       22708   -2.10   -0.10  1.0000
  -2  11   0   21604    4540                                                       22648   -2.10    0.10  1.0000
   1 -11   0    2766    1090                                                        2710   -0.32    0.26  1.0000
  -1  11   0     830    2500                                                         800   -0.32   -0.26  1.0000
   0  11   0     643    2340                                                         470    2.21    0.23  1.0000
  -4 -11   0   10331    1710                                                        9689   -1.92   -0.14  1.0000
  -5 -11   0       1    1030                                                           0   -0.51    0.19  1.0000
  -6 -11   0    2003    1170                                                        1320    5.04   -0.08  1.0000
   6  11   0    1217    2880                                                         700    5.04    0.08  1.0000
   7  11   0       8    3120                                                           0   -1.73   -0.07  1.0000
  -8 -11   0   16001    2440                                                       16778   -1.82   -0.08  1.0000
   8  11   0   22430    4090                                                       23348   -1.82    0.08  1.0000
   9  11   0   11141    3690                                                       12629   -4.08   -0.19  1.0000
 -10 -11   0   10172    1540                                                        7779    7.57   -0.06  1.0000
 -11 -11   0    7124    1640                                                        5589   -5.77    0.09  1.0000
  11  11   0    5944    3120                                                        4550   -5.77   -0.09  1.0000
  12  11   0   26210    4120                                                       25667    1.01    0.00  1.0000
 -13 -11   0      35    2050                                                           0    3.54    0.04  1.0000
  13  11   0      35    3220                                                           0    3.54   -0.04  1.0000
  14  11   0   29160    4900                                                       30277   -1.94    0.04  1.0000
 -15 -11   0    9295    2560                                                        8729    1.78   -0.12  1.0000
  15  11   0     293    2920                                                         200    1.78    0.12  1.0000
 -16 -11   0   34003    4700                                                       34207   -0.33    0.17  1.0000
 -14  12   0   20438    5179                                                       21198   -1.57   -0.13  1.0000
 -13  12   0    4005    3030                                                        4290    1.32    0.05  1.0000
 -12  12   0   17933    4700                                                       17088    1.91    0.11  1.0000
 -11  12   0   25680    4750                                                       25897   -0.40   -0.21  1.0000
 -10  12   0   19835    4400                                                       21008   -2.45    0.13  1.0000
  -9  12   0   17426    4160                                                       18868    3.20   -0.01  1.0000
  -7  12   0   16949    3420                                                       12779  -10.25    0.03  1.0000
  -6  12   0   10826    3560                                                       12709   -5.20    0.03  1.0000
   5 -12   0    6949    1990                                                       11189   13.40    0.05  1.0000
  -5  12   0    7464    3480                                                       11839   13.40   -0.05  1.0000
   4 -12   0   42035    3730                                                       43796   -2.54    0.01  1.0000
  -4  12   0   29762    5029                                                       31247   -2.54   -0.01  1.0000
   2 -12   0    1395     920                                                        2620    8.28    0.07  1.0000
  -2  12   0     537    2480                                                        1370    8.28   -0.07  1.0000
   1 -12   0    1969    1020                                                        1390   -4.24    0.01  1.0000
  -1  12   0      50    2540                                                           0   -4.24   -0.01  1.0000
  -1  12   0      50    1430                                                           0   -4.24   -0.01  1.0000
  -1 -12   0   24481    2860                                                       23798    1.32    0.10  1.0000
   1  12   0   25110    4550                                                       24418    1.32   -0.10  1.0000
  -2 -12   0   17522    2550                                                       17948   -0.96   -0.26  1.0000
   2  12   0   21704    4170                                                       22178   -0.96    0.26  1.0000
  -3 -12   0   42457    3890                                                       43576   -1.61    0.07  1.0000
   3  12   0   34289    4480                                                       35296   -1.61   -0.07  1.0000
  -4 -12   0    3186    1210                                                        2580    3.38    0.12  1.0000
   4  12   0    5269    2520                                                        4480    3.38   -0.12  1.0000
  -5 -12   0    3936    1230                                                        4250   -1.47   -0.54  1.0000
   5  12   0    6574    3040                                                        6979   -1.47    0.54  1.0000
  -6 -12   0   13598    2050                                                       12999   -1.55    0.26  1.0000
   6  12   0   14283    3890                                                       13669   -1.55   -0.26  1.0000
  -7 -12   0    1056    1240                                                         960    0.91   -0.10  1.0000
   7  12   0       2    3160                                                           0    0.91    0.10  1.0000
   8  12   0    9695    3440                                                        9729    0.10   -0.10  1.0000
  -9 -12   0    4972    1680                                                        5579    2.50   -0.32  1.0000
   9  12   0    9517    3230                                                       10349    2.50    0.32  1.0000
 -10 -12   0    3692    1470                                                        5109   -6.41    0.31  1.0000
  10  12   0    4402    3440                                                        5939   -6.41   -0.31  1.0000
 -11 -12   0   65303    5899                                                       67583    2.64   -0.12  1.0000
  11  12   0   56276    7439                                                       58394    2.64    0.12  1.0000
 -12 -12   0      55    1570                                                           0    4.42    0.04  1.0000
  12  12   0      55    2820                                                           0    4.42   -0.04  1.0000
 -13 -12   0   12698    2530                                                       10619   -5.76   -0.09  1.0000
  13  12   0   11547    3390                                                        9569   -5.76    0.09  1.0000
 -14 -12   0     442    1760                                                         840    4.76    0.04  1.0000
  14  12   0      63    3400                                                           0    4.76   -0.04  1.0000
 -15 -12   0    2042    1850                                                        1920   -0.82    0.06  1.0000
  15  12   0     942    3050                                                         860   -0.82   -0.06  1.0000
 -13  13   0    6654    3140                                                        7249    2.13    0.05  1.0000
 -12  13   0   31117    5229                                                       30527   -1.00   -0.18  1.0000
 -11  13   0   16667    4510                                                       17128   -1.06    0.20  1.0000
 -10  13   0   27855    4760                                                       26987    1.57   -0.07  1.0000
  -9  13   0    7971    2740                                                        5849   -7.66   -0.01  1.0000
  -8  13   0   12837    3870                                                       13129    0.77    0.02  1.0000
  -7  13   0    4720    2560                                                        6739    8.01   -0.01  1.0000
  -6  13   0    6245    2500                                                        6329    0.32   -0.01  1.0000
  -5  13   0    3581    2450                                                        2510   -5.83    0.02  1.0000
   4 -13   0    9473    1830                                                        9559    0.26    0.07  1.0000
   3 -13   0   73513    6089                                                       66573    7.84   -0.19  1.0000
  -3  13   0   77829    7859                                                       70683    7.84    0.19  1.0000
  -2  13   0   10465    2990                                                        8539   -5.92   -0.07  1.0000
   1 -13   0     450    1090                                                         850    4.75    0.01  1.0000
  -1  13   0      63    2580                                                           0    4.75   -0.01  1.0000
   0 -13   0       0    1260                                                           0    0.07    0.02  1.0000
   0  13   0       0    2340                                                           0    0.07   -0.02  1.0000
  -3 -13   0   20894    2560                                                       20008    1.85   -0.10  1.0000
   3  13   0   24375    3110                                                       23418    1.85    0.10  1.0000
  -4 -13   0   18026    2530                                                       19218   -2.61   -0.12  1.0000
   4  13   0   23800    3760                                                       25167   -2.61    0.12  1.0000
  -5 -13   0   37852    3430                                                       37366    0.75    0.41  1.0000
   5  13   0   28720    4980                                                       28297    0.75   -0.41  1.0000
  -6 -13   0       5    1150                                                           0    1.36   -0.26  1.0000
   7  13   0    1047    3290                                                        1260   -1.87   -0.28  1.0000
   8  13   0    8916    3560                                                        8049   -2.81    0.03  1.0000
  -9 -13   0      10    1440                                                           0   -1.84    0.30  1.0000
   9  13   0     743    3250                                                         920   -1.84   -0.30  1.0000
 -10 -13   0      43    1760                                                         140    3.17   -0.21  1.0000
  10  13   0      28    3480                                                           0    3.17    0.21  1.0000
 -11 -13   0     296    1810                                                         340    0.74    0.10  1.0000
  11  13   0       2    3420                                                           0    0.74   -0.10  1.0000
 -12 -13   0   38642    3790                                                       35996   -4.10   -0.08  1.0000
  12  13   0   33612    4930                                                       31147   -4.10    0.08  1.0000
 -13 -13   0     181    1600                                                           0    8.06    0.07  1.0000
  13  13   0      27    3030                                                         350    8.06   -0.07  1.0000
 -14 -13   0      41    1710                                                           0   -3.81   -0.08  1.0000
  14  13   0      41    3350                                                           0   -3.81    0.08  1.0000
 -15 -13   0    3939    1900                                                        3860   -0.38   -0.01  1.0000
 -12  14   0   19402    4750                                                       19328    0.20    0.24  1.0000
 -11  14   0   23955    4870                                                       24548   -1.12   -0.26  1.0000
 -10  14   0   28583    5259                                                       31497   -5.03    0.06  1.0000
  -9  14   0   26758    4600                                                       23588    5.98    0.06  1.0000
  -8  14   0   34701    5439                                                       34237    0.75   -0.04  1.0000
  -7  14   0    5441    2880                                                        8089   -9.67   -0.01  1.0000
  -6  14   0      12    2690                                                           0    2.05    0.03  1.0000
   2 -14   0    3884    1080                                                        3100    3.97    0.03  1.0000
  -2  14   0    3906    3000                                                        3120    3.97   -0.03  1.0000
  -1  14   0    7804    1930                                                        6349   -5.18    0.02  1.0000
  -1  14   0    9271    2950                                                        7679   -5.18    0.02  1.0000
   0 -14   0    1441    1220                                                        1430   -0.09    0.05  1.0000
   0  14   0       0    2470                                                           0   -0.09   -0.05  1.0000
  -3 -14   0    5729    1480                                                        5729    0.00   -0.07  1.0000
  -4 -14   0    1050    1260                                                         920    1.26    0.45  1.0000
   4  14   0    1136    2650                                                        1000    1.26   -0.45  1.0000
  -5 -14   0    2537    1260                                                        2610    0.16   -0.73  1.0000
   5  14   0    7225    3150                                                        7349    0.16    0.73  1.0000
  -6 -14   0    8536    1960                                                        9889   -4.22    0.31  1.0000
   6  14   0   10915    3550                                                       12439   -4.22   -0.31  1.0000
   7  14   0     147    3330                                                         260    2.40   -0.06  1.0000
   8  14   0    4268    3630                                                        4730    2.06    0.07  1.0000
   9  14   0    5133    3550                                                        5409    1.13    0.18  1.0000
  10  14   0    9693    3690                                                        9479   -0.65   -0.07  1.0000
 -11 -14   0    1009    1710                                                         970    0.37    0.01  1.0000
  11  14   0     897    3460                                                         860    0.37   -0.01  1.0000
 -12 -14   0      96    1870                                                           0    5.86   -0.01  1.0000
  12  14   0    1080    3260                                                        1820    5.86    0.01  1.0000
 -13 -14   0     939    2030                                                         380   -6.66    0.00  1.0000
  13  14   0     985    2860                                                         410   -6.66    0.00  1.0000
 -14 -14   0      16    2050                                                           0    2.37   -0.08  1.0000
 -11  15   0   24250    4920                                                       25807    2.94    0.24  1.0000
 -10  15   0   23624    4930                                                       24588    1.86   -0.11  1.0000
  -9  15   0   14547    4800                                                       18568   -9.36   -0.08  1.0000
  -8  15   0    2367    2990                                                        3420    5.88    0.12  1.0000
  -7  15   0   30908    5189                                                       26547    7.70   -0.11  1.0000
  -3  15   0   11828    3770                                                       11469    0.99    0.00  1.0000
  -2  15   0   20480    5579                                                       22298   -3.72    0.11  1.0000
  -1  15   0   26862    5319                                                       24148    5.08    0.11  1.0000
  -1  15   0   25701    3210                                                       23048    5.08    0.11  1.0000
   0 -15   0    6110    1510                                                        6019   -0.35   -0.03  1.0000
   0  15   0    4276    2950                                                        4200   -0.35    0.03  1.0000
  -3 -15   0    3917    1510                                                        3450   -2.31    0.32  1.0000
   3  15   0     884    2210                                                         670   -2.31   -0.32  1.0000
  -4 -15   0       1    1410                                                           0   -0.27   -0.43  1.0000
   4  15   0       1    2810                                                           0   -0.27    0.43  1.0000
   5  15   0       6    3410                                                           0   -1.16   -0.96  1.0000
  -6 -15   0    3617    1390                                                        3190    2.19   -0.32  1.0000
   6  15   0    3595    3490                                                        3170    2.19    0.32  1.0000
   7  15   0      39    3530                                                           0   -3.71    0.13  1.0000
   8  15   0    6276    3810                                                        6099   -0.68   -0.31  1.0000
  -9 -15   0    9773    2400                                                        9539    0.71    0.18  1.0000
 -10 -15   0      44    1450                                                          70    1.05   -0.28  1.0000
  10  15   0    2020    3550                                                        2180    1.05    0.28  1.0000
 -11 -15   0    2369    1780                                                        2070    1.90   -0.12  1.0000
  11  15   0      10    3660                                                           0    1.90    0.12  1.0000
 -12 -15   0     632    1700                                                        1160   -5.34    0.10  1.0000
  12  15   0    4714    3370                                                        6019   -5.34   -0.10  1.0000
 -13 -15   0      91    1780                                                           0    5.71   -0.11  1.0000
  -9  16   0    8121    3240                                                        6019    7.50    0.12  1.0000
  -8  16   0    8704    3450                                                        8259   -1.45   -0.09  1.0000
  -6  16   0     137    3860                                                           0    7.00   -0.09  1.0000
  -4  16   0    5496    3990                                                        5909    1.64    0.04  1.0000
  -3  16   0     675    3580                                                         630    0.53   -0.11  1.0000
  -2  16   0    5435    3410                                                        4810   -2.61   -0.02  1.0000
  -1  16   0   29914    4120                                                       32387   -4.19    0.03  1.0000
  -1  16   0   40245    5889                                                       43106   -4.19    0.03  1.0000
   2  16   0    2319    3010                                                        2720   -2.39   -0.22  1.0000
  -3 -16   0   10761    2450                                                       10529    0.67   -0.22  1.0000
   3  16   0    2583    2970                                                        2470    0.67    0.22  1.0000
  -4 -16   0   13728    2560                                                       13739    0.03    0.26  1.0000
   4  16   0    8050    3330                                                        8059    0.03   -0.26  1.0000
  -5 -16   0     772    1300                                                         880    1.11   -0.45  1.0000
   5  16   0    3388    3620                                                        3610    1.11    0.45  1.0000
   6  16   0   11255    3920                                                       10749   -1.45   -0.31  1.0000
  -7 -16   0      36    1450                                                           0    3.57   -0.08  1.0000
   7  16   0    2775    3710                                                        3440    3.57    0.08  1.0000
   8  16   0    9286    4030                                                       10309    3.09    0.31  1.0000
   9  16   0    8663    3960                                                        8819   -0.50    0.10  1.0000
 -10 -16   0       7    1550                                                           0    1.54    0.24  1.0000
  10  16   0    4082    3550                                                        3760    1.54   -0.24  1.0000
 -11 -16   0       0    1580                                                           0   -0.34   -0.04  1.0000
  11  16   0    3006    3780                                                        3070   -0.34    0.04  1.0000
 -12 -16   0       4    1550                                                           0    1.15   -0.07  1.0000
  -7  17   0   24299    6899                                                       28257    7.31   -0.08  1.0000
  -6  17   0     208    4040                                                         580   -5.78    0.06  1.0000
  -5  17   0       1    4160                                                           0    0.72    0.01  1.0000
  -4  17   0   10402    4230                                                       11409   -2.88    0.01  1.0000
  -3  17   0   13343    4190                                                       13329   -0.04    0.09  1.0000
  -2  17   0    3712    2210                                                        3770   -0.28    0.02  1.0000
  -2  17   0       0    3530                                                           0   -0.28    0.02  1.0000
  -1  17   0   16392    2830                                                       18068    3.82    0.16  1.0000
   2  17   0   27419    3990                                                       27507    0.16   -0.32  1.0000
  -3 -17   0    4512    1670                                                        4800   -1.26    0.02  1.0000
   5  17   0    6515    3970                                                        6449   -0.25   -0.22  1.0000
  -6 -17   0    4363    1710                                                        4670    1.36    0.13  1.0000
   6  17   0   10633    3940                                                       11109    1.36   -0.13  1.0000
   7  17   0   10830    4030                                                       10269   -1.65    0.31  1.0000
   8  17   0   17482    4630                                                       16578   -2.07   -0.29  1.0000
  -9 -17   0    5626    1770                                                        6139    2.00   -0.02  1.0000
   9  17   0    9332    3930                                                        9989    2.00    0.02  1.0000
 -10 -17   0       3    1430                                                           0   -0.96   -0.30  1.0000
  -6  18   0     966    4540                                                        1670    5.85   -0.09  1.0000
  -5  18   0    3494    4490                                                        2580   -4.97   -0.02  1.0000
  -4  18   0       1    4120                                                           0    0.62    0.12  1.0000
  -3  18   0       0    3900                                                           0    0.28   -0.07  1.0000
  -2  18   0    2086    3530                                                        2040    0.30   -0.03  1.0000
  -1  18   0   11926    3770                                                       10529   -3.95   -0.16  1.0000
   0  18   0       1    3430                                                           0    0.40    0.21  1.0000
   1  18   0       0    3510                                                           0   -0.07   -0.08  1.0000
   3  18   0      15    3560                                                           0    2.29   -0.20  1.0000
  -4 -18   0    2760    1830                                                        2840   -0.45   -0.25  1.0000
   4  18   0    2238    3700                                                        2310   -0.45    0.25  1.0000
  -5 -18   0   13571    2900                                                       13439    0.34    0.03  1.0000
   5  18   0   13229    4310                                                       13099    0.34   -0.03  1.0000
  -6 -18   0    6670    1820                                                        6989    1.15   -0.32  1.0000
   6  18   0    8862    4040                                                        9229    1.15    0.32  1.0000
   7  18   0    8590    4140                                                        9489    2.83   -0.28  1.0000
  -8 -18   0    5307    1920                                                        5729    1.70   -0.40  1.0000
  -9 -18   0      14    1570                                                           0   -2.28   -0.01  1.0000
  -3  19   0     804    3850                                                         490   -3.72    0.17  1.0000
  -2  19   0      34    4030                                                           0    3.49    0.04  1.0000
  -1  19   0    1064    3740                                                        1370    2.62   -0.07  1.0000
   0  19   0       0    3370                                                           0   -0.30   -0.10  1.0000
   1  19   0    5838    3660                                                        5589    0.98   -0.02  1.0000
  -6 -19   0   25312    3490                                                       25457   -0.27    0.06  1.0000
   1  19  -1       1    3570                                                           0    0.17    0.39  1.0000
   0  19  -1       3    3400                                                           0    0.95   -0.16  1.0000
  -1  19  -1      31    3680                                                           0   -3.31    0.09  1.0000
  -2  19  -1       0    3980                                                           0    0.05   -0.08  1.0000
  -7 -18   1    4079    1990                                                        4280   -0.92    0.50  1.0000
  -6 -18   1    1564    1510                                                        1500    0.49   -0.03  1.0000
   5  18  -1    6096    4220                                                        7579   -5.37    0.00  1.0000
   4  18  -1    6656    3760                                                        6219    1.63   -0.39  1.0000
   3  18  -1       1    3740                                                           0   -0.33    0.28  1.0000
   2  18  -1   11071    3060                                                       10869   -0.58    0.20  1.0000
  -2  18  -1    5613    3580                                                        5139    1.93    0.14  1.0000
  -3  18  -1    9893    4130                                                        9629   -0.80   -0.04  1.0000
  -4  18  -1       2    4120                                                           0    0.83   -0.08  1.0000
  -5  18  -1   13380    4730                                                       12799   -1.52    0.10  1.0000
   8  17  -1   10405    4140                                                       11229    2.37   -0.44  1.0000
  -8 -17   1    5335    1820                                                        5929    2.37    0.44  1.0000
   7  17  -1   12545    4160                                                       12319   -0.61   -0.01  1.0000
   6  17  -1    6707    3940                                                        6499   -0.79    0.57  1.0000
  -6 -17   1       3    1830                                                           0   -0.79   -0.57  1.0000
   5  17  -1    3952    3900                                                        4930    4.39   -0.19  1.0000
  -5 -17   1      37    1520                                                         180    4.39    0.19  1.0000
   4  17  -1     803    3500                                                         600   -2.33    0.46  1.0000
  -4 -17   1      88    1710                                                          30   -2.33   -0.46  1.0000
   2  17  -1    5210    3120                                                        5589    1.54    0.28  1.0000
   0  17  -1   30074    3720                                                       29347   -1.26   -0.16  1.0000
  -2  17  -1    9603    2790                                                       10049    1.35   -0.05  1.0000
  -2  17  -1     351    3550                                                         440    1.35   -0.05  1.0000
  -3  17  -1   22864    6609                                                       24398   -2.98   -0.02  1.0000
  -4  17  -1     457    4040                                                         790    4.03    0.04  1.0000
  -5  17  -1    3287    4160                                                        2780    2.76   -0.11  1.0000
  -7  17  -1   10622    4270                                                       12369   -4.87   -0.04  1.0000
 -11 -16   1      26    1670                                                           0    3.02    0.19  1.0000
  10  16  -1    2452    3700                                                        3450   -5.51   -0.14  1.0000
   9  16  -1    6024    4020                                                        5519    1.99    0.11  1.0000
  -9 -16   1      93    1560                                                          40    1.99   -0.11  1.0000
   8  16  -1    6433    4000                                                        7639   -4.30    0.25  1.0000
   7  16  -1    3699    3790                                                        3750    0.25   -0.05  1.0000
   6  16  -1    1846    3690                                                        1830    0.16   -0.68  1.0000
   5  16  -1     328    3600                                                         690   -4.87    0.40  1.0000
  -5 -16   1       1    1620                                                          50   -4.87   -0.40  1.0000
   4  16  -1     542    3170                                                         340    2.90   -0.23  1.0000
  -4 -16   1    1774    1580                                                        1390    2.90    0.23  1.0000
   3  16  -1     891    2890                                                         680    2.26    0.41  1.0000
  -3 -16   1   11358    2400                                                       10569    2.26   -0.41  1.0000
  -2 -16   1   13073    2670                                                       14489   -3.61    0.44  1.0000
  -2  16  -1     655    1950                                                         940    3.02   -0.02  1.0000
  -2  16  -1     466    3510                                                         710    3.02   -0.02  1.0000
  -4  16  -1     329    3880                                                         990   -7.97   -0.05  1.0000
  -6  16  -1     224    3720                                                         230    0.13    0.07  1.0000
  -9  16  -1      38    3280                                                           0    3.69   -0.01  1.0000
 -12 -15   1      17    1880                                                           0   -2.47    0.05  1.0000
  11  15  -1    1359    3750                                                         730   -5.89    0.12  1.0000
 -11 -15   1      97    1670                                                           0   -5.89   -0.12  1.0000
  10  15  -1     129    3570                                                           0    6.80    0.02  1.0000
 -10 -15   1     129    1720                                                           0    6.80   -0.02  1.0000
   9  15  -1    5314    3920                                                        6399   -4.25   -0.16  1.0000
  -9 -15   1    1840    1480                                                        2500   -4.25    0.16  1.0000
   8  15  -1    6760    3970                                                        7199    1.57   -0.12  1.0000
   7  15  -1    2564    3630                                                        2770    1.19    0.14  1.0000
   6  15  -1    8858    3640                                                        8659    0.64    0.52  1.0000
  -6 -15   1    4238    1490                                                        4100    0.64   -0.52  1.0000
   5  15  -1      69    3380                                                           0    4.96   -0.04  1.0000
  -5 -15   1    2514    1350                                                        1750    4.96    0.04  1.0000
  -4 -15   1   44059    4490                                                       45955   -2.67   -0.17  1.0000
   2  15  -1   96950   10439                                                       92531    4.29   -0.08  1.0000
  -2 -15   1  110030    8799                                                      105319    4.29    0.08  1.0000
   1  15  -1   39531    4560                                                       39766   -0.35    0.19  1.0000
   0  15  -1   53785    6879                                                       55774   -2.54   -0.02  1.0000
   0  15  -1   50134    5599                                                       52055   -2.54   -0.02  1.0000
  -2  15  -1      38    3210                                                           0   -3.67   -0.11  1.0000
  -3  15  -1    5754    3640                                                        6249   -1.91   -0.17  1.0000
  -4  15  -1     231    3350                                                           0    9.08    0.21  1.0000
  -8  15  -1      29    3090                                                           0    3.20    0.04  1.0000
  -9  15  -1    3750    3080                                                        4140   -1.86    0.03  1.0000
 -10  15  -1   31766    5709                                                       33557    2.96   -0.08  1.0000
 -13 -14   1    1437    1790                                                        2060   -4.47   -0.09  1.0000
  12  14  -1       1    3490                                                           0   -0.71   -0.07  1.0000
 -12 -14   1       1    1950                                                           0   -0.71    0.07  1.0000
  11  14  -1     122    3730                                                           0    6.59   -0.08  1.0000
 -11 -14   1     579    1940                                                         170    6.59    0.08  1.0000
  10  14  -1    7294    3550                                                        4820   -9.56   -0.11  1.0000
 -10 -14   1    8513    1790                                                        5819   -9.56    0.11  1.0000
   9  14  -1      23    3770                                                           0    2.89    0.15  1.0000
  -9 -14   1      23    1510                                                           0    2.89   -0.15  1.0000
   8  14  -1    2305    3690                                                        2380    0.46    0.07  1.0000
   7  14  -1      11    3420                                                           0   -1.94    0.27  1.0000
   6  14  -1     223    3360                                                         330    1.94   -0.54  1.0000
  -6 -14   1     223    1310                                                         330    1.94    0.54  1.0000
   5  14  -1    1657    3200                                                        2250   -4.02   -0.27  1.0000
  -5 -14   1    3463    1360                                                        4300   -4.02    0.27  1.0000
   4  14  -1    5300    2860                                                        4330    4.19    0.48  1.0000
  -4 -14   1    3488    1290                                                        2710    4.19   -0.48  1.0000
   3  14  -1    4466    2040                                                        4730    1.15   -0.44  1.0000
  -3 -14   1       4    1220                                                           0    1.15    0.44  1.0000
   2  14  -1    2290    2750                                                        2740   -2.68    0.24  1.0000
   1  14  -1   27099    3000                                                       26907    0.35   -0.42  1.0000
   1  14  -1   18356    4590                                                       18198    0.35   -0.42  1.0000
  -1 -14   1   20344    2860                                                       20178    0.35    0.42  1.0000
   0  14  -1     860    2490                                                         520    3.90    0.01  1.0000
  -1  14  -1   29736    5549                                                       30967   -2.11    0.04  1.0000
  -1  14  -1   26230    3580                                                       27387   -2.11    0.04  1.0000
   1 -14   1   30158    3140                                                       31397   -2.11   -0.04  1.0000
  -2  14  -1     599    3070                                                         850    2.80    0.14  1.0000
  -3  14  -1      13    2950                                                           0    2.19    0.08  1.0000
  -7  14  -1      10    2860                                                           0    1.88   -0.09  1.0000
  -8  14  -1    4867    2920                                                        4770   -0.42    0.00  1.0000
  -9  14  -1   38759    5719                                                       37286    2.26   -0.04  1.0000
 -10  14  -1   16334    4430                                                       16558   -0.52    0.05  1.0000
 -11  14  -1   20904    4720                                                       21268    0.75   -0.03  1.0000
 -12  14  -1   32986    5449                                                       31037    3.26    0.01  1.0000
 -14 -13   1   10423    2740                                                       11089   -1.92    0.03  1.0000
  13  13  -1      21    2950                                                           0    2.74   -0.15  1.0000
 -13 -13   1    1935    1800                                                        2360    2.74    0.15  1.0000
  12  13  -1    8330    3670                                                        8579   -0.81    0.05  1.0000
 -12 -13   1   14096    2670                                                       14419   -0.81   -0.05  1.0000
  11  13  -1   13249    4470                                                       17168   -9.52    0.06  1.0000
  10  13  -1     289    3420                                                           0   10.15    0.27  1.0000
  -9 -13   1   22424    3160                                                       21348   -2.17    0.24  1.0000
  -8 -13   1       1    1480                                                           0    0.55   -0.02  1.0000
   7  13  -1     298    3280                                                         460    2.50   -0.01  1.0000
   6  13  -1     238    3220                                                         190   -0.98    0.50  1.0000
  -6 -13   1    1587    1210                                                        1460   -0.98   -0.50  1.0000
  -5 -13   1    2054    1270                                                        2790    4.48   -0.12  1.0000
   4  13  -1    4205    2810                                                        5179   -4.26   -0.53  1.0000
  -2 -13   1    7816    2090                                                        8889    3.51    0.33  1.0000
   0  13  -1    1537    2450                                                        1160   -3.08    0.05  1.0000
   0 -13   1    6299    1350                                                        5509   -3.08   -0.05  1.0000
  -1  13  -1     630    2670                                                         930    3.23    0.11  1.0000
  -1  13  -1     349    1630                                                         580    3.23    0.11  1.0000
   1 -13   1    2025    1120                                                        2540    3.23   -0.11  1.0000
  -2  13  -1    8009    3030                                                       10129   -6.67   -0.14  1.0000
   2 -13   1    8125    1830                                                       10259   -6.67    0.14  1.0000
  -4  13  -1   96491   10739                                                      108689   11.39    0.06  1.0000
  -5  13  -1   35819    4740                                                       29577  -10.33    0.02  1.0000
  -6  13  -1      20    2510                                                           0    2.65   -0.14  1.0000
  -7  13  -1   16679    4190                                                       16908    0.53    0.00  1.0000
  -8  13  -1   25349    4800                                                       26367    1.89    0.09  1.0000
  -9  13  -1    6062    2660                                                        5349   -2.82    0.02  1.0000
 -10  13  -1   56780    6929                                                       54735    2.59   -0.09  1.0000
 -11  13  -1   19846    4770                                                       22738    5.93    0.05  1.0000
 -12  13  -1    4399    3040                                                        6239   -7.57    0.01  1.0000
 -13  13  -1    6950    3160                                                        7069    0.42   -0.15  1.0000
 -15 -12   1     825    2500                                                         990   -1.64    0.00  1.0000
  14  12  -1       0    3450                                                           0    0.20    0.03  1.0000
  13  12  -1     227    2870                                                         360   -2.33    0.09  1.0000
 -13 -12   1    1150    2130                                                        1430   -2.33   -0.09  1.0000
  12  12  -1    4279    3310                                                        4940   -2.91   -0.06  1.0000
 -12 -12   1    2463    1740                                                        2970   -2.91    0.06  1.0000
  11  12  -1     340    3580                                                           0   11.02   -0.05  1.0000
 -11 -12   1    4901    1600                                                        2660   11.02    0.05  1.0000
 -10 -12   1   22067    3250                                                       27217   -9.82    0.03  1.0000
   9  12  -1   24431    4710                                                       26137    3.21    0.08  1.0000
  -9 -12   1   21959    2990                                                       23578    3.21   -0.08  1.0000
   8  12  -1    6056    3550                                                        5539    2.03    0.10  1.0000
   7  12  -1    6185    3260                                                        6189    0.01   -0.07  1.0000
  -7 -12   1    5256    1550                                                        5259    0.01    0.07  1.0000
   6  12  -1    3927    3140                                                        4590   -3.04   -0.28  1.0000
  -6 -12   1    6145    1390                                                        6969   -3.04    0.28  1.0000
   5  12  -1    5653    2930                                                        5449   -0.82   -0.14  1.0000
  -5 -12   1    5479    1270                                                        5279   -0.82    0.14  1.0000
   4  12  -1    1859    2570                                                        2220    2.39    0.09  1.0000
  -4 -12   1    1549    1130                                                        1880    2.39   -0.09  1.0000
  -3 -12   1    8529    1900                                                        8079    1.48    0.38  1.0000
   0  12  -1       9    2340                                                           0    1.77   -0.28  1.0000
  -1  12  -1       3    2540                                                           0   -1.09    0.17  1.0000
  -1  12  -1       3    1560                                                           0   -1.09    0.17  1.0000
   1 -12   1       3    1050                                                           0   -1.09   -0.17  1.0000
  -2  12  -1    9545    2710                                                        9119    1.32    0.14  1.0000
  -2  12  -1   10322    2280                                                        9879    1.32    0.14  1.0000
   2 -12   1   13170    1790                                                       12669    1.32   -0.14  1.0000
  -3  12  -1   85593    8149                                                       82572    3.12    0.16  1.0000
  -4  12  -1   29275    4420                                                       38486  -15.00   -0.16  1.0000
   4 -12   1   28543    3610                                                       37646  -15.00    0.16  1.0000
  -5  12  -1    8737    3730                                                       14159   15.26    0.03  1.0000
  -6  12  -1    2676    2330                                                        3490   -4.39    0.17  1.0000
  -7  12  -1    2859    2380                                                        3020   -0.89   -0.08  1.0000
  -8  12  -1   14202    3810                                                       17628    8.13   -0.04  1.0000
  -9  12  -1   24283    4510                                                       24808    1.00    0.02  1.0000
 -10  12  -1    3660    2610                                                        3130   -2.72    0.03  1.0000
 -11  12  -1   50157    6729                                                       53355   -4.20   -0.05  1.0000
 -12  12  -1   34134    5749                                                       37956    6.02    0.05  1.0000
 -13  12  -1    5959    3090                                                        7079   -4.15    0.11  1.0000
 -14  12  -1   24518    5379                                                       23808   -1.37   -0.14  1.0000
  15  11  -1    6774    3220                                                        7489   -2.53    0.06  1.0000
  14  11  -1    1976    3400                                                        1930    0.31    0.02  1.0000
 -14 -11   1    1946    2620                                                        1900    0.31   -0.02  1.0000
  13  11  -1   18139    3920                                                       18308   -0.37   -0.08  1.0000
 -13 -11   1   16019    3760                                                       16178   -0.37    0.08  1.0000
  12  11  -1      27    2990                                                           0    3.12    0.04  1.0000
 -12 -11   1    3185    2330                                                        3800    3.12   -0.04  1.0000
  11  11  -1   27150    5089                                                       32297   -8.94    0.08  1.0000
 -11 -11   1   28297    4270                                                       33547   -8.94   -0.08  1.0000
  10  11  -1   27313    4760                                                       23148    7.85    0.01  1.0000
 -10 -11   1   36949    3760                                                       32077    7.85   -0.01  1.0000
   9  11  -1    2959    3180                                                        2920    0.21    0.18  1.0000
   8  11  -1    5641    3450                                                        6079   -1.71   -0.27  1.0000
  -8 -11   1    4670    1380                                                        5069   -1.71    0.27  1.0000
   7  11  -1    8531    3200                                                        8839   -0.99    0.05  1.0000
  -7 -11   1    3297    1240                                                        3490   -0.99   -0.05  1.0000
   6  11  -1   11843    3510                                                       10559    3.63    0.07  1.0000
  -6 -11   1   18187    2410                                                       16588    3.63   -0.07  1.0000
  -5 -11   1      33    1130                                                           0   -3.43   -0.31  1.0000
   4  11  -1   12429    2810                                                       12049   -1.03   -0.28  1.0000
  -4 -11   1    9572    1870                                                        9239   -1.03    0.28  1.0000
   1  11  -1   29870    3170                                                       30417    0.94    0.07  1.0000
  -1 -11   1   25343    3030                                                       25847    0.94   -0.07  1.0000
  -1  11  -1    2677    1330                                                        1990   -4.26   -0.21  1.0000
  -1  11  -1    2197    2440                                                        1580   -4.26   -0.21  1.0000
   1 -11   1    1623     960                                                        1100   -4.26    0.21  1.0000
  -2  11  -1   22133    4370                                                       22158    0.05   -0.12  1.0000
  -2  11  -1   24532    2760                                                       24558    0.05   -0.12  1.0000
   2 -11   1   23233    2500                                                       23258    0.05    0.12  1.0000
  -4  11  -1   50635    5679                                                       42466   11.33   -0.03  1.0000
   4 -11   1   60021    4340                                                       51095   11.33    0.03  1.0000
  -6  11  -1   41142    4790                                                       38206    4.41   -0.12  1.0000
   6 -11   1   33730    3430                                                       31077    4.41    0.12  1.0000
  -7  11  -1   10965    3350                                                       12169    3.35    0.08  1.0000
  -8  11  -1   33612    5159                                                       37546   -6.24   -0.01  1.0000
  -9  11  -1    7730    2500                                                        7609   -0.41   -0.02  1.0000
 -10  11  -1    5690    2450                                                        5829    0.55   -0.03  1.0000
 -11  11  -1   47191    6139                                                       44936    3.14   -0.01  1.0000
 -12  11  -1   12614    4430                                                       15718   -7.81   -0.09  1.0000
 -13  11  -1      87    2940                                                           0    5.57   -0.01  1.0000
 -14  11  -1     933    3090                                                        1570   -5.43    0.12  1.0000
 -16 -10   1   38421    5509                                                       40716   -3.45   -0.12  1.0000
  15  10  -1      22    3020                                                           0    2.83   -0.13  1.0000
 -15 -10   1     435    2850                                                         260    2.83    0.13  1.0000
 -14 -10   1   49620    6089                                                       52085   -3.27   -0.02  1.0000
  13  10  -1       1    3230                                                           0   -0.55    0.07  1.0000
 -13 -10   1       1    2680                                                           0   -0.55   -0.07  1.0000
  12  10  -1    1403    2760                                                        1310    0.75    0.01  1.0000
 -12 -10   1       2    2600                                                           0    0.75   -0.01  1.0000
  10  10  -1    4144    3380                                                        4480   -1.53   -0.15  1.0000
 -10 -10   1       7    2320                                                           0   -1.53    0.15  1.0000
   9  10  -1   54391    6449                                                       56174   -2.27   -0.04  1.0000
  -9 -10   1   50251    5529                                                       51965   -2.27    0.04  1.0000
   8  10  -1     983    3190                                                         840    1.42    0.29  1.0000
  -8 -10   1       6    1740                                                           0    1.42   -0.29  1.0000
   7  10  -1    1085    3180                                                        1060    0.23   -0.32  1.0000
  -6 -10   1      44    1140                                                           0   -3.97   -0.03  1.0000
   5  10  -1    3583    3010                                                        3340    1.23   -0.20  1.0000
   4  10  -1    7157    2540                                                        6269    3.24    0.09  1.0000
  -4 -10   1    4084    1170                                                        3420    3.24   -0.09  1.0000
   3  10  -1  156663   15298                                                      157194    0.40   -0.09  1.0000
  -3 -10   1  148348   13139                                                      148865    0.40    0.09  1.0000
   2  10  -1   48274    5589                                                       48895   -0.84    0.26  1.0000
   2  10  -1   47509    4920                                                       48125   -0.84    0.26  1.0000
  -2 -10   1   41709    4330                                                       42286   -0.84   -0.26  1.0000
   1  10  -1   99033    8879                                                       96320   -2.60   -0.06  1.0000
   1  10  -1   80628    8759                                                       78182   -2.60   -0.06  1.0000
  -1 -10   1   92229    7649                                                       89611   -2.60    0.06  1.0000
   0  10  -1   30037    4940                                                       29647    0.68   -0.09  1.0000
   0  10  -1   37080    3780                                                       36646    0.68   -0.09  1.0000
  -1  10  -1   24507    4310                                                       24788    0.53   -0.01  1.0000
  -1  10  -1   26167    2810                                                       26457    0.53   -0.01  1.0000
   1 -10   1   22191    2640                                                       22458    0.53    0.01  1.0000
  -3  10  -1   52397    6189                                                       52595    0.26   -0.04  1.0000
   3 -10   1   58605    5009                                                       58814    0.26    0.04  1.0000
  -4  10  -1   32110    4940                                                       36166   -6.57    0.11  1.0000
   4 -10   1   33468    3550                                                       37606   -6.57   -0.11  1.0000
  -5  10  -1   31384    3910                                                       24838   11.69   -0.08  1.0000
   5 -10   1   29153    2640                                                       22858   11.69    0.08  1.0000
   6 -10   1    9253    2110                                                       10199   -2.87   -0.11  1.0000
   7 -10   1    6435    1600                                                        7239   -2.91   -0.01  1.0000
  -8  10  -1    4212    2050                                                        2690    7.79   -0.08  1.0000
   8 -10   1    1707    1700                                                         800    7.79    0.08  1.0000
  -9  10  -1    1425    2290                                                        1670   -1.86    0.02  1.0000
   9 -10   1    7596    1840                                                        8149   -1.86   -0.02  1.0000
  10 -10   1   27931    3010                                                       26997   -1.69   -0.09  1.0000
 -11  10  -1   22443    4250                                                       18528   -8.19   -0.06  1.0000
 -12  10  -1    9240    2830                                                        6979    7.53    0.13  1.0000
 -13  10  -1    3844    2960                                                        2690   -6.06    0.03  1.0000
 -14  10  -1    3599    3090                                                        2820    4.12   -0.05  1.0000
 -15  10  -1      46    3110                                                           0   -4.07   -0.01  1.0000
 -17  -9   1    1255    2790                                                        1160   -0.82    0.04  1.0000
  16   9  -1    3147    2920                                                        3130   -0.09   -0.12  1.0000
 -16  -9   1    4079    2630                                                        4060   -0.09    0.12  1.0000
  15   9  -1     529    2710                                                         410   -1.64    0.15  1.0000
 -15  -9   1    6586    2480                                                        6149   -1.64   -0.15  1.0000
  14   9  -1       3    3130                                                           0    0.96   -0.06  1.0000
 -14  -9   1    5342    2430                                                        5579    0.96    0.06  1.0000
  13   9  -1    1122    3270                                                        1310    1.61   -0.02  1.0000
 -13  -9   1    7767    2370                                                        8249    1.61    0.02  1.0000
  12   9  -1       2    2650                                                           0   -0.79    0.02  1.0000
 -12  -9   1      71    2110                                                          50   -0.79   -0.02  1.0000
  11   9  -1   16750    3460                                                       15738   -2.37   -0.05  1.0000
   9   9  -1      24    2970                                                           0    2.96   -0.06  1.0000
  -9  -9   1      24    2050                                                           0    2.96    0.06  1.0000
   8   9  -1    9256    3340                                                        8199   -3.39   -0.17  1.0000
  -7  -9   1     769    1710                                                         680   -0.99   -0.19  1.0000
   6   9  -1  130609   12439                                                      136306    4.66   -0.09  1.0000
  -6  -9   1  100006   10529                                                      104999    4.66    0.09  1.0000
  -5  -9   1   15864    2120                                                       16438   -1.35   -0.08  1.0000
   4   9  -1     773    2430                                                        1220   -4.26    0.16  1.0000
  -3  -9   1   12042    2070                                                       14059    5.28    0.01  1.0000
   2   9  -1    6410    2090                                                        6209   -0.76   -0.27  1.0000
  -2  -9   1    7152    1580                                                        6939   -0.76    0.27  1.0000
   1   9  -1    6006    1980                                                        5609    1.56    0.13  1.0000
  -1  -9   1    6016    1210                                                        5619    1.56   -0.13  1.0000
   0   9  -1    9937    2430                                                       10719   -2.30    0.12  1.0000
   0  -9   1   11354    1850                                                       12189   -2.30   -0.12  1.0000
   2  -9   1   57402    5109                                                       58064   -0.82    0.21  1.0000
  -3   9  -1   26493    4080                                                       27717    2.22    0.03  1.0000
   3  -9   1   28948    2900                                                       30227    2.22   -0.03  1.0000
  -4   9  -1    4815    1980                                                        3850    4.39   -0.05  1.0000
   4  -9   1    3824    1060                                                        2970    4.39    0.05  1.0000
  -5   9  -1   43167    5049                                                       47165   -5.63    0.03  1.0000
   5  -9   1   33713    3990                                                       37256   -5.63   -0.03  1.0000
   7  -9   1    8793    1660                                                        8449    1.11   -0.03  1.0000
   8  -9   1   12947    1840                                                        9089  -11.03   -0.03  1.0000
  -9   9  -1   35369    4380                                                       34027    2.15   -0.10  1.0000
   9  -9   1   24923    3330                                                       23798    2.15    0.10  1.0000
  10  -9   1   12195    2190                                                       12839    1.72    0.02  1.0000
 -11   9  -1   58325    6989                                                       58024   -0.37    0.05  1.0000
 -12   9  -1   47627    6169                                                       47595   -0.04   -0.13  1.0000
 -13   9  -1      55    2670                                                           0    4.44    0.04  1.0000
 -14   9  -1   28532    4940                                                       27367   -2.08    0.04  1.0000
 -15   9  -1   31063    5269                                                       32877    3.03   -0.03  1.0000
 -17  -8   1    3265    2470                                                        3990   -3.60   -0.07  1.0000
  16   8  -1     861    2980                                                         930    0.69    0.10  1.0000
 -16  -8   1    8516    2540                                                        8729    0.69   -0.10  1.0000
  15   8  -1       0    2850                                                           0   -0.06   -0.13  1.0000
 -15  -8   1       0    2490                                                           0   -0.06    0.13  1.0000
 -12  -8   1    2958    2220                                                        3570    3.21   -0.08  1.0000
  11   8  -1       5    2680                                                           0    1.32   -0.08  1.0000
 -11  -8   1    6026    2160                                                        5689    1.32    0.08  1.0000
  10   8  -1       3    2920                                                           0    0.99   -0.07  1.0000
 -10  -8   1       3    1960                                                           0    0.99    0.07  1.0000
  -9  -8   1   39294    4320                                                       38676   -0.94   -0.06  1.0000
   8   8  -1       8    2900                                                           0   -1.69    0.03  1.0000
  -8  -8   1    4502    1750                                                        4890   -1.69   -0.03  1.0000
  -7  -8   1   17390    3170                                                       18098    1.59    0.03  1.0000
   6   8  -1      36    2870                                                           0   -3.60    0.03  1.0000
   5   8  -1      64    2810                                                           0    4.77   -0.08  1.0000
  -5  -8   1    1515    1440                                                        2200    4.77    0.08  1.0000
   4   8  -1   17696    3630                                                       15788    4.41   -0.06  1.0000
  -4  -8   1   25321    2260                                                       23028    4.41    0.06  1.0000
  -3  -8   1    8395    1720                                                        7199   -4.05   -0.11  1.0000
   2   8  -1     156    1880                                                         310   -3.05    0.14  1.0000
   1   8  -1   42345    5179                                                       42786    0.64   -0.06  1.0000
   1   8  -1   42106    4510                                                       42546    0.64   -0.06  1.0000
  -1  -8   1   45547    4040                                                       46005    0.64    0.06  1.0000
  -1   8  -1   53779    6469                                                       57954    5.28    0.08  1.0000
   1  -8   1   65793    5619                                                       70403    5.28   -0.08  1.0000
  -2   8  -1    3658    1500                                                        3300   -1.82    0.10  1.0000
   2  -8   1    4718     820                                                        4310   -1.82   -0.10  1.0000
  -3   8  -1  109792   11029                                                      108139   -1.50   -0.03  1.0000
   3  -8   1  107958    9229                                                      106319   -1.50    0.03  1.0000
  -4   8  -1  145211   14199                                                      147805    2.03    0.08  1.0000
   4  -8   1  130785   12059                                                      133247    2.03   -0.08  1.0000
  -5   8  -1  116096   10839                                                      118608    2.19   -0.02  1.0000
   5  -8   1   90333    9189                                                       92551    2.19    0.02  1.0000
  -6   8  -1    4831    1770                                                        4050   -3.51    0.03  1.0000
   6  -8   1      34    1480                                                           0   -3.51   -0.03  1.0000
   7  -8   1   49374    4970                                                       51155    2.38    0.04  1.0000
  -8   8  -1   15510    3500                                                       16228    1.70    0.01  1.0000
   8  -8   1   12484    2560                                                       13129    1.70   -0.01  1.0000
   9  -8   1   13407    2410                                                       12589   -2.14   -0.09  1.0000
 -10   8  -1   32647    4860                                                       32387    0.43    0.03  1.0000
  10  -8   1   38558    3700                                                       38276    0.43   -0.03  1.0000
 -13   8  -1    2911    1270                                                        3260    1.88   -0.05  1.0000
 -14   8  -1     987    1590                                                         660    3.43    0.02  1.0000
  17   7  -1      21    3700                                                           0    2.75   -0.14  1.0000
 -17  -7   1    1977    2500                                                        1590    2.75    0.14  1.0000
  16   7  -1      21    3220                                                           0   -2.74    0.00  1.0000
 -16  -7   1      21    2400                                                           0   -2.74    0.00  1.0000
  13   7  -1      17    2740                                                           0    2.44    0.06  1.0000
 -13  -7   1     226    2000                                                         120    2.44   -0.06  1.0000
 -12  -7   1     470    1940                                                         310   -2.44    0.08  1.0000
 -10  -7   1   26775    3570                                                       27817   -1.89   -0.06  1.0000
   9   7  -1      15    2820                                                           0   -2.31   -0.19  1.0000
  -9  -7   1     510    1680                                                         700   -2.31    0.19  1.0000
   5   7  -1       2    2670                                                           0   -0.94    0.04  1.0000
  -5  -7   1     479    1510                                                         550   -0.94   -0.04  1.0000
   4   7  -1   42174    5659                                                       46165   -5.68    0.05  1.0000
  -4  -7   1   47591    4740                                                       51825   -5.68   -0.05  1.0000
   2   7  -1   47720    4910                                                       41446    8.89   -0.22  1.0000
   2   7  -1   43291    4410                                                       37326    8.89   -0.22  1.0000
  -2  -7   1   54196    3850                                                       47495    8.89    0.22  1.0000
   0   7  -1    5336    1870                                                        6289    3.74    0.04  1.0000
   0  -7   1    6900    1420                                                        7979    3.74   -0.04  1.0000
   1  -7   1    1850     790                                                        1410   -3.26    0.07  1.0000
  -2   7  -1   97862   10149                                                      106569    8.15    0.03  1.0000
   2  -7   1   84344    8519                                                       92441    8.15   -0.03  1.0000
  -3   7  -1   29415    3550                                                       28507   -1.60   -0.12  1.0000
   3  -7   1   22430    2430                                                       21638   -1.60    0.12  1.0000
  -4   7  -1  174514   16618                                                      175372    0.61   -0.11  1.0000
   4  -7   1  154956   14179                                                      155764    0.61    0.11  1.0000
  -5   7  -1  149586   13359                                                      147375   -1.72    0.09  1.0000
   5  -7   1  118827   11439                                                      116858   -1.72   -0.09  1.0000
   7  -7   1   15194    2140                                                       12289   -7.42    0.00  1.0000
  -8   7  -1   13978    3130                                                       13499   -1.22   -0.06  1.0000
   8  -7   1   10994    2150                                                       10569   -1.22    0.06  1.0000
   9  -7   1   15460    2380                                                       15868    0.98   -0.04  1.0000
  10  -7   1   19609    2850                                                       19998   -0.83    0.14  1.0000
  12  -7   1   10020    3690                                                        8389    5.09    0.09  1.0000
 -13   7  -1    6374    1760                                                        7499   -4.04    0.01  1.0000
  13  -7   1    4733    3850                                                        5709   -4.04   -0.01  1.0000
 -14   7  -1   23367    3320                                                       23028    0.67   -0.07  1.0000
 -15   7  -1    7408    2210                                                        7129    0.98    0.07  1.0000
  15  -7   1    4651    4250                                                        4430    0.98   -0.07  1.0000
  16  -7   1       3    4370                                                           0    1.11   -0.01  1.0000
 -17   7  -1   10953    2020                                                       10699    0.73   -0.05  1.0000
 -18  -6   1    1751    2420                                                        1630   -0.88    0.05  1.0000
  17   6  -1    1306    4030                                                        1400   -0.76    0.07  1.0000
 -17  -6   1    8335    2330                                                        8569   -0.76   -0.07  1.0000
 -16  -6   1    1147    2110                                                        1510    2.98    0.03  1.0000
 -14  -6   1      11    1770                                                           0    1.98   -0.03  1.0000
  13   6  -1       0    2390                                                           0   -0.01    0.01  1.0000
 -13  -6   1       0    1670                                                           0   -0.01   -0.01  1.0000
 -12  -6   1    4572    1800                                                        4730    0.69    0.01  1.0000
  11   6  -1    2298    2780                                                        2410    0.69   -0.05  1.0000
 -11  -6   1    2924    1660                                                        3050    0.69    0.05  1.0000
  10   6  -1    5029    2420                                                        4730    1.28    0.04  1.0000
 -10  -6   1    5615    1680                                                        5299    1.28   -0.04  1.0000
   9   6  -1   10649    2870                                                       10549    0.29    0.07  1.0000
   8   6  -1  143346   13719                                                      142356   -0.78   -0.10  1.0000
  -8  -6   1  127360   11689                                                      126427   -0.78    0.10  1.0000
  -7  -6   1    1568    1350                                                        2070   -3.53   -0.04  1.0000
   6   6  -1   54134    6279                                                       56384    2.86    0.07  1.0000
  -6  -6   1   48788    5039                                                       50925    2.86   -0.07  1.0000
   4   6  -1   39864    5339                                                       43306    5.05    0.01  1.0000
  -4  -6   1   41879    4250                                                       45405    5.05   -0.01  1.0000
   1   6  -1   77163    6829                                                       69823    8.10   -0.08  1.0000
  -1  -6   1   70122    5789                                                       63134    8.10    0.08  1.0000
   0   6  -1   44147    5079                                                       42766   -1.98   -0.08  1.0000
   0  -6   1   49315    4100                                                       47855   -1.98    0.08  1.0000
  -2   6  -1    3241    1510                                                        2760   -2.63   -0.04  1.0000
  -3   6  -1    8355    2470                                                       10289    6.00    0.17  1.0000
  -4   6  -1   63511    6379                                                       67343   -4.48   -0.02  1.0000
   4  -6   1   48441    5339                                                       51795   -4.48    0.02  1.0000
  -7   6  -1    7088    1730                                                        4920    8.40   -0.10  1.0000
   7  -6   1   11056    1910                                                        8299    8.40    0.10  1.0000
   8  -6   1   51483    5069                                                       52645   -1.52   -0.16  1.0000
   9  -6   1   35396    4760                                                       34877   -0.83    0.06  1.0000
   9  -6   1   28119    3420                                                       27657   -0.83    0.06  1.0000
  10  -6   1      15    2910                                                           0    2.33   -0.17  1.0000
 -12   6  -1   17593    2370                                                       19558   -4.31    0.08  1.0000
 -13   6  -1    1827    1240                                                        1500    2.40   -0.06  1.0000
  13  -6   1      16    3900                                                           0    2.40    0.06  1.0000
 -14   6  -1       1    1770                                                           0   -0.46    0.08  1.0000
  14  -6   1       1    4150                                                           0   -0.46   -0.08  1.0000
  15  -6   1      12    4480                                                           0   -2.07    0.02  1.0000
  16  -6   1       0    4640                                                           0    0.01    0.04  1.0000
 -17   6  -1      39    1580                                                           0   -3.74    0.04  1.0000
  17  -6   1      39    4910                                                           0   -3.74   -0.04  1.0000
 -18  -5   1       1    2060                                                           0   -0.71   -0.07  1.0000
  17   5  -1       4    3810                                                           0    1.17   -0.06  1.0000
 -17  -5   1       4    1870                                                           0    1.17    0.06  1.0000
 -16  -5   1    2464    1870                                                        2530    0.40   -0.07  1.0000
 -15  -5   1     969    1820                                                         890    0.78    0.10  1.0000
  14   5  -1       1    2770                                                           0   -0.51    0.08  1.0000
 -13  -5   1       0    1880                                                           0   -0.05    0.01  1.0000
 -12  -5   1    1470    1870                                                        1620   -1.14    0.04  1.0000
  11   5  -1   12733    3510                                                       12159   -1.54    0.10  1.0000
  10   5  -1       0    2720                                                           0   -0.16   -0.11  1.0000
  -9  -5   1       5    1710                                                           0   -1.31    0.11  1.0000
   7   5  -1   85327   11009                                                       91181    5.89   -0.25  1.0000
  -7  -5   1  114182    9409                                                      120938    5.89    0.25  1.0000
  -2  -5   1  184987   15718                                                      183462   -1.06    0.28  1.0000
   0   5  -1   54180    5779                                                       52795   -1.79    0.15  1.0000
   0  -5   1   60589    4920                                                       59124   -1.79   -0.15  1.0000
  -2   5  -1    3646    1450                                                        2740    4.81   -0.01  1.0000
  -3   5  -1   10858    2390                                                       10569    0.84   -0.12  1.0000
  -4   5  -1   31497    3980                                                       32057   -0.94   -0.04  1.0000
  -5   5  -1   10112    2660                                                       10609    1.46    0.07  1.0000
   6  -5   1   14285    2640                                                       13639   -1.64    0.05  1.0000
   7  -5   1   57945    6269                                                       51565   -8.16   -0.09  1.0000
   7  -5   1   60414    5179                                                       53895   -8.16   -0.09  1.0000
   8  -5   1   29452    3080                                                       26297    5.65    0.10  1.0000
   9  -5   1   18540    4210                                                       18568    0.06   -0.03  1.0000
  10  -5   1    9330    3350                                                        8519   -2.57    0.13  1.0000
  11  -5   1  146508   15408                                                      149105    2.02   -0.10  1.0000
 -12   5  -1      27    1080                                                         200    5.37   -0.01  1.0000
  12  -5   1      81    3650                                                           0    5.37    0.01  1.0000
 -13   5  -1   24723    3000                                                       21938   -5.45   -0.01  1.0000
 -14   5  -1   13350    2170                                                       13389    0.10   -0.10  1.0000
  14  -5   1    6921    4390                                                        6949    0.10    0.10  1.0000
  15  -5   1       0    4420                                                           0    0.33   -0.06  1.0000
 -16   5  -1       6    1550                                                           0    1.52    0.07  1.0000
  16  -5   1       6    4630                                                           0    1.52   -0.07  1.0000
 -17   5  -1   10081    2530                                                       10869    2.30   -0.03  1.0000
  17  -5   1     957    4920                                                        1210    2.30    0.03  1.0000
 -18   5  -1    2998    1990                                                        3660   -3.43   -0.05  1.0000
 -18  -4   1    4702    1920                                                        5199    2.11    0.04  1.0000
  17   4  -1    1000    3690                                                        1010    0.10    0.11  1.0000
 -17  -4   1   11394    2780                                                       11429    0.10   -0.11  1.0000
 -16  -4   1     713    1850                                                         860    1.57    0.06  1.0000
  14   4  -1    6561    3220                                                        6439   -0.45    0.04  1.0000
  11   4  -1       0    2410                                                           0    0.33    0.02  1.0000
 -11  -4   1    6428    2300                                                        6339    0.33   -0.02  1.0000
  -7  -4   1    1769    1840                                                        1280   -3.76   -0.19  1.0000
  -6  -4   1   24967    3540                                                       25087    0.23    0.06  1.0000
   2   4  -1  218472   20848                                                      210799   -4.95    0.29  1.0000
   0   4  -1   48644    6609                                                       66423   22.23   -0.19  1.0000
  -1   4  -1   13339    2500                                                       16878   -8.62    0.15  1.0000
  -2   4  -1   57927    6759                                                       64914   -8.43   -0.04  1.0000
  -3   4  -1  124899   12479                                                      123918    0.83    0.01  1.0000
  -4   4  -1  102850   10429                                                      102550   -0.28    0.16  1.0000
   5  -4   1   10175    2150                                                       12359   -6.16    0.12  1.0000
   6  -4   1  140258   14269                                                      141756    1.19    0.03  1.0000
   7  -4   1    3251    2780                                                        4860    7.59   -0.04  1.0000
   7  -4   1    4546    1660                                                        6419    7.59   -0.04  1.0000
   8  -4   1   42327    4350                                                       40736   -2.33   -0.10  1.0000
   9  -4   1     892    3020                                                         630    2.86    0.00  1.0000
  10  -4   1   13368    3500                                                       13329   -0.10   -0.04  1.0000
 -11   4  -1   20459    2240                                                       18998   -3.11   -0.09  1.0000
  11  -4   1   16893    4410                                                       15568   -3.11    0.09  1.0000
 -12   4  -1   64518    5699                                                       62004   -2.99   -0.02  1.0000
 -13   4  -1   59348    6049                                                       62974    4.38    0.08  1.0000
 -15   4  -1   26737    3450                                                       27167    0.78   -0.04  1.0000
 -16   4  -1    1699    1570                                                        1860   -1.14   -0.03  1.0000
  16  -4   1    2082    4340                                                        2260   -1.14    0.03  1.0000
 -17   4  -1    2858    1840                                                        3090   -1.27    0.06  1.0000
  17  -4   1       5    4470                                                           0   -1.27   -0.06  1.0000
  18  -4   1      46    4690                                                           0    4.06    0.04  1.0000
  18   3  -1       1    3500                                                           0   -0.45   -0.04  1.0000
 -18  -3   1     895    1770                                                         940   -0.45    0.04  1.0000
  17   3  -1     545    3420                                                         600    0.69   -0.02  1.0000
 -16  -3   1       5    1960                                                           0   -1.36   -0.05  1.0000
 -15  -3   1    3649    2110                                                        3560   -0.44    0.07  1.0000
  14   3  -1    1593    3570                                                        1630    0.27   -0.01  1.0000
  13   3  -1    3487    3150                                                        3400   -0.44   -0.02  1.0000
 -13  -3   1    8999    2330                                                        8859   -0.44    0.02  1.0000
  12   3  -1   19967    3720                                                       19148   -1.75    0.03  1.0000
  11   3  -1    5447    2470                                                        5429    0.07   -0.03  1.0000
  10   3  -1     964    2320                                                        1280    2.83   -0.07  1.0000
 -10  -3   1    1368    1890                                                        1740    2.83    0.07  1.0000
   9   3  -1      99    2640                                                           0   -5.94    0.07  1.0000
  -9  -3   1    4048    2080                                                        5409   -5.94   -0.07  1.0000
  -8  -3   1   10268    2230                                                       12509    6.29    0.03  1.0000
   6   3  -1  209960   19338                                                      214109    2.69    0.18  1.0000
  -6  -3   1  169780   16768                                                      173513    2.69   -0.18  1.0000
   5   3  -1  137784   16048                                                      160574  -17.66   -0.04  1.0000
   0   3  -1   58581    8619                                                       87011  -31.66    0.10  1.0000
  -1   3  -1   10461    2320                                                       16098   14.71   -0.08  1.0000
  -2   3  -1   31876    3280                                                       26857    8.77   -0.08  1.0000
  -3   3  -1  172045   15498                                                      155154  -12.49    0.05  1.0000
   5  -3   1   96644   10219                                                       99960    3.15   -0.26  1.0000
   7  -3   1  119908   12919                                                      126417   -5.55    0.01  1.0000
   8  -3   1  145103   15068                                                      149035    3.07    0.05  1.0000
   9  -3   1   77805    8569                                                       78492   -0.73    0.03  1.0000
  10  -3   1       3    3150                                                           0    1.08   -0.06  1.0000
 -11   3  -1  110631    9719                                                      111479   -0.76    0.02  1.0000
 -12   3  -1     960    1680                                                         880   -0.79   -0.03  1.0000
  13  -3   1     823    3590                                                         720    1.11   -0.01  1.0000
  14  -3   1       4    3790                                                           0    1.19    0.04  1.0000
 -15   3  -1   30492    3620                                                       31107    1.05   -0.04  1.0000
 -16   3  -1   13762    2720                                                       13479    0.72    0.03  1.0000
  17  -3   1    1241    3960                                                        1450    1.70    0.04  1.0000
  18   2  -1      18    3400                                                           0    2.51    0.03  1.0000
 -18  -2   1    5389    2000                                                        4790    2.51   -0.03  1.0000
  17   2  -1       2    3420                                                           0    0.88    0.04  1.0000
 -17  -2   1     334    2020                                                         390    0.88   -0.04  1.0000
 -15  -2   1       0    2240                                                           0   -0.23    0.07  1.0000
 -13  -2   1   55143    5629                                                       55524    0.48    0.12  1.0000
  12   2  -1    3193    3020                                                        3550    1.84    0.09  1.0000
 -12  -2   1       9    1960                                                           0    1.84   -0.09  1.0000
  11   2  -1    3472    2830                                                        3340   -0.68   -0.08  1.0000
 -11  -2   1   11904    2320                                                       11659   -0.68    0.08  1.0000
  -9  -2   1    3525    2260                                                        2220    7.33   -0.08  1.0000
   8   2  -1   62116    7219                                                       68263   -7.20    0.07  1.0000
   7   2  -1  132760   12249                                                      132347    0.34    0.11  1.0000
  -7  -2   1  109965   10879                                                      109589    0.34   -0.11  1.0000
  -2   2  -1   13301    1620                                                        7049  -18.76    0.12  1.0000
   3  -2   1   85623    8899                                                       88091    2.50    0.16  1.0000
   6  -2   1  164792   15468                                                      154235    7.90    0.01  1.0000
   7  -2   1   87644    8679                                                       82822    4.94   -0.04  1.0000
 -10   2  -1      18    1640                                                           0   -2.50   -0.10  1.0000
  11  -2   1   10428    3220                                                       10259    0.50   -0.01  1.0000
  13  -2   1    1318    3440                                                        1640   -2.51   -0.03  1.0000
 -14   2  -1    2885    1530                                                        2390    2.89    0.03  1.0000
  14  -2   1    3791    3500                                                        3220    2.89   -0.03  1.0000
 -15   2  -1   11700    2570                                                       12369   -1.82    0.00  1.0000
 -16   2  -1    4752    1930                                                        4740   -0.05    0.01  1.0000
  16  -2   1    4942    4000                                                        4930   -0.05   -0.01  1.0000
 -17   2  -1    6831    1960                                                        6239   -2.19   -0.01  1.0000
  17  -2   1    5426    4160                                                        4900   -2.19    0.01  1.0000
 -18   2  -1    2260    1710                                                        1750    3.42   -0.06  1.0000
  18  -2   1      33    4350                                                           0    3.42    0.06  1.0000
  18   1  -1      10    3320                                                           0   -1.89   -0.06  1.0000
 -18  -1   1    3198    2010                                                        2850   -1.89    0.06  1.0000
  17   1  -1       3    3320                                                           0   -1.09   -0.08  1.0000
 -17  -1   1    1400    2290                                                        1540   -1.09    0.08  1.0000
  16   1  -1       8    3300                                                           0   -1.71    0.01  1.0000
 -16  -1   1       8    2230                                                           0   -1.71   -0.01  1.0000
  15   1  -1       3    3160                                                           0   -1.10    0.15  1.0000
 -15  -1   1       3    1930                                                           0   -1.10   -0.15  1.0000
  14   1  -1      58    3120                                                           0    4.54   -0.21  1.0000
 -14  -1   1      83    1930                                                         280    4.54    0.21  1.0000
  13   1  -1      18    3350                                                           0   -2.56    0.11  1.0000
  12   1  -1   25879    4620                                                       25247   -1.18    0.00  1.0000
  11   1  -1   10254    3430                                                       11549    3.71   -0.02  1.0000
 -10  -1   1    7537    2420                                                        8499    3.21   -0.13  1.0000
   9   1  -1    2060    2480                                                        1020   -8.05   -0.10  1.0000
  -9  -1   1     181    1750                                                           0   -8.05    0.10  1.0000
  -8  -1   1    1770    1410                                                        2230    3.08    0.05  1.0000
   6   1  -1  300630   28737                                                      309569   -4.84    0.10  1.0000
  -6  -1   1  261709   24718                                                      270053   -4.84   -0.10  1.0000
   5   1  -1   94906    9169                                                       90481    4.35   -0.17  1.0000
   4   1  -1  116942   12199                                                      121578   -4.01   -0.07  1.0000
   3   1  -1  132412   12219                                                      122408   -8.38    0.16  1.0000
   3  -1   1  250634   26767                                                      270793  -11.81   -0.11  1.0000
   4  -1   1  166948   15948                                                      160174   -5.01    0.22  1.0000
  -6   1  -1  203223   18408                                                      193801   -6.32    0.12  1.0000
   6  -1   1  248957   21508                                                      238516   -6.32   -0.12  1.0000
  -8   1  -1    2015    1440                                                        1950   -0.44    0.05  1.0000
 -12   1  -1    1524    1680                                                        1930   -2.93    0.02  1.0000
  12  -1   1      24    3230                                                           0   -2.93   -0.02  1.0000
 -13   1  -1   16930    2880                                                       18928    4.46   -0.06  1.0000
 -14   1  -1   17034    2730                                                       16558   -1.10    0.02  1.0000
  14  -1   1   16862    4350                                                       16388   -1.10   -0.02  1.0000
 -15   1  -1     755    1810                                                         640    1.30   -0.01  1.0000
  15  -1   1       5    3490                                                           0    1.30    0.01  1.0000
 -16   1  -1    2428    1890                                                        2550    0.73   -0.08  1.0000
  16  -1   1       2    3570                                                           0    0.73    0.08  1.0000
 -17   1  -1    2049    1710                                                        1960   -0.59    0.05  1.0000
  17  -1   1       1    3820                                                           0   -0.59   -0.05  1.0000
 -18   1  -1    4830    1710                                                        3950   -3.98    0.12  1.0000
  18  -1   1      44    4010                                                           0   -3.98   -0.12  1.0000
 -19   1  -1     715    1500                                                        1000    2.92   -0.09  1.0000
  18   0  -1       1    3730                                                           0    0.60    0.09  1.0000
 -18   0   1       1    2290                                                           0    0.60   -0.09  1.0000
  17   0  -1       0    3320                                                           0   -0.25    0.06  1.0000
 -17   0   1    5742    2230                                                        5679   -0.25   -0.06  1.0000
  16   0  -1    1953    3160                                                        1630    2.28   -0.10  1.0000
 -16   0   1    1744    1990                                                        1440    2.28    0.10  1.0000
  15   0  -1     117    3210                                                          40   -2.68   -0.07  1.0000
 -15   0   1    5079    2030                                                        4460   -2.68    0.07  1.0000
  14   0  -1      29    3170                                                           0   -3.24    0.09  1.0000
 -14   0   1      29    2130                                                           0   -3.24   -0.09  1.0000
  13   0  -1    1314    3060                                                        1080    2.03   -0.01  1.0000
  12   0  -1     484    3050                                                         710    2.77    0.03  1.0000
 -12   0   1      22    2240                                                           0    2.77   -0.03  1.0000
 -10   0   1   34291    3630                                                       33967   -0.53    0.13  1.0000
   9   0  -1   75103    9959                                                       80882    6.19    0.24  1.0000
  -9   0   1   97171    8219                                                      103730    6.19   -0.24  1.0000
   8   0  -1    6736    2690                                                        5669   -4.05   -0.06  1.0000
   7   0  -1  197421   19828                                                      199020    1.07    0.08  1.0000
   3   0   1  188381   14389                                                      145095   31.76   -0.17  1.0000
   4   0   1   95430    9329                                                       92861   -2.50   -0.06  1.0000
  -5   0  -1  132358   12719                                                      143916   -9.30   -0.26  1.0000
   5   0   1  138065   14679                                                      149865   -9.30    0.26  1.0000
  -6   0  -1  265583   21738                                                      293831   15.98   -0.05  1.0000
   6   0   1  190327   25177                                                      214349   15.98    0.05  1.0000
   7   0   1   99811    9899                                                       96760   -2.91   -0.21  1.0000
  -9   0  -1   57743    5449                                                       57494    0.31    0.14  1.0000
   9   0   1   52061    6159                                                       51825    0.31   -0.14  1.0000
 -10   0  -1   20646    3190                                                       22978   -4.72   -0.30  1.0000
  10   0   1   16686    3850                                                       18788   -4.72    0.30  1.0000
 -11   0  -1    2849    1540                                                        2900    0.28    0.16  1.0000
  11   0   1     293    2600                                                         310    0.28   -0.16  1.0000
 -12   0  -1   29315    3280                                                       25997    5.97    0.00  1.0000
 -13   0  -1   16003    2900                                                       18738   -6.21    0.00  1.0000
 -14   0  -1   19769    3280                                                       19568    0.43   -0.09  1.0000
 -15   0  -1    5366    1890                                                        5499   -0.54    0.16  1.0000
  15   0   1    2145    3580                                                        2230   -0.54   -0.16  1.0000
 -16   0  -1    5938    1840                                                        7039   -4.09    0.09  1.0000
  16   0   1    4151    3870                                                        5079   -4.09   -0.09  1.0000
  17   0   1    1707    3750                                                        1310    3.06    0.07  1.0000
 -18   0  -1    4958    1620                                                        4880    0.33   -0.09  1.0000
  18   0   1       0    3740                                                           0    0.33    0.09  1.0000
 -19   0  -1     310    1520                                                         400   -1.43    0.08  1.0000
  18  -1  -1       0    4230                                                           0   -0.36   -0.09  1.0000
 -18   1   1    7007    2340                                                        7109   -0.36    0.09  1.0000
  17  -1  -1      35    3840                                                           0   -3.51   -0.07  1.0000
 -17   1   1     272    1890                                                         500   -3.51    0.07  1.0000
  15  -1  -1      42    3150                                                           0    3.88    0.10  1.0000
 -15   1   1     273    2190                                                         530    3.88   -0.10  1.0000
  14  -1  -1      19    2960                                                           0    2.59   -0.09  1.0000
 -14   1   1     918    2280                                                        1200    2.59    0.09  1.0000
  13  -1  -1    1624    2920                                                        1770    1.06    0.01  1.0000
 -13   1   1      43    2140                                                          70    1.06   -0.01  1.0000
 -12   1   1   60711    6049                                                       63744   -3.64   -0.06  1.0000
  11  -1  -1     156    2880                                                         460    5.35   -0.05  1.0000
 -11   1   1    3683    1400                                                        4850    5.35    0.05  1.0000
   9  -1  -1   16296    3700                                                       14439   -4.48   -0.36  1.0000
   6  -1  -1  326044   31387                                                      316428   -5.07    0.07  1.0000
  -3  -1  -1   31420    4570                                                       52855  -31.48   -0.17  1.0000
  -9  -1  -1  223746   18248                                                      226287   -1.60   -0.12  1.0000
   9   1   1  196598   21228                                                      198980   -1.60    0.12  1.0000
 -10  -1  -1    6334    1640                                                        7179    3.07    0.19  1.0000
 -11  -1  -1   63818    5819                                                       61284    3.03   -0.14  1.0000
 -12  -1  -1     987    1730                                                        1820   -6.72    0.04  1.0000
  12   1   1     109    2790                                                         470   -6.72   -0.04  1.0000
  13   1   1   45592    5429                                                       40836    6.84    0.01  1.0000
 -14  -1  -1    1575    1850                                                        1220   -2.85    0.10  1.0000
  14   1   1      23    2850                                                           0   -2.85   -0.10  1.0000
 -15  -1  -1   46807    4810                                                       47545   -1.02   -0.08  1.0000
 -16  -1  -1    2980    1640                                                        3500    2.73   -0.13  1.0000
  16   1   1     215    3320                                                         370    2.73    0.13  1.0000
 -17  -1  -1    4185    1620                                                        4970   -3.47    0.18  1.0000
  17   1   1     167    3700                                                         350   -3.47   -0.18  1.0000
 -18  -1  -1    3844    1560                                                        3690    0.75    0.06  1.0000
  18   1   1       2    3980                                                           0    0.75   -0.06  1.0000
  18  -2  -1    1430    3960                                                        1240   -1.56    0.12  1.0000
 -18   2   1     351    1920                                                         260   -1.56   -0.12  1.0000
  17  -2  -1      56    3950                                                           0    4.46    0.03  1.0000
 -17   2   1      54    1940                                                         220    4.46   -0.03  1.0000
  16  -2  -1       1    4020                                                           0   -0.60   -0.07  1.0000
 -16   2   1    3049    2220                                                        2940   -0.60    0.07  1.0000
  15  -2  -1       9    3750                                                           0   -1.74   -0.04  1.0000
 -15   2   1      65    2260                                                         120   -1.74    0.04  1.0000
  14  -2  -1    1492    3530                                                        1380   -0.88    0.08  1.0000
 -14   2   1    4465    2200                                                        4270   -0.88   -0.08  1.0000
 -13   2   1   45679    4650                                                       45385   -0.41   -0.01  1.0000
 -12   2   1   17639    2490                                                       15978    3.83    0.12  1.0000
  11  -2  -1     422    2700                                                          70   -7.28    0.12  1.0000
 -11   2   1    1918    1470                                                        1000   -7.28   -0.12  1.0000
  10  -2  -1    1993    2690                                                        1830    1.12   -0.11  1.0000
   9  -2  -1    7469    2770                                                        6459    3.62    0.19  1.0000
   9  -2  -1    3433    2830                                                        2760    3.62    0.19  1.0000
   7  -2  -1  101521   10729                                                      104190   -2.49   -0.01  1.0000
   3   2   1  320820   24368                                                      246535   41.79   -0.19  1.0000
  -5  -2  -1  180926   17198                                                      183982   -2.14   -0.21  1.0000
   5   2   1  215493   19978                                                      218828   -2.14    0.21  1.0000
  -6  -2  -1  401151   30967                                                      391171    4.74    0.09  1.0000
   6   2   1  345574   35976                                                      336316    4.74   -0.09  1.0000
  -9  -2  -1   33907    4210                                                       34017    0.18    0.11  1.0000
   9   2   1   40486    4960                                                       40606    0.18   -0.11  1.0000
 -10  -2  -1      26    1760                                                           0   -3.03   -0.17  1.0000
  10   2   1     449    3030                                                         260   -3.03    0.17  1.0000
 -11  -2  -1    5833    1850                                                        4460   -5.74    0.06  1.0000
  11   2   1    2669    2870                                                        1770   -5.74   -0.06  1.0000
 -12  -2  -1   10766    2730                                                       14179    9.16    0.14  1.0000
  12   2   1    2124    3070                                                        3770    9.16   -0.14  1.0000
 -13  -2  -1    6731    1850                                                        9039   -7.79   -0.06  1.0000
  13   2   1    3860    3090                                                        5649   -7.79    0.06  1.0000
  14   2   1     507    3070                                                         530    0.30    0.02  1.0000
 -15  -2  -1    6027    1750                                                        5839    0.73    0.11  1.0000
  15   2   1    5113    3140                                                        4940    0.73   -0.11  1.0000
 -16  -2  -1    4493    1530                                                        3910   -2.69    0.12  1.0000
  16   2   1      20    2990                                                           0   -2.69   -0.12  1.0000
 -17  -2  -1     232    1530                                                         100    3.13   -0.20  1.0000
  17   2   1      28    3190                                                           0    3.13    0.20  1.0000
 -18  -2  -1     869    1540                                                        1110    2.30   -0.06  1.0000
  18   2   1      15    3520                                                           0    2.30    0.06  1.0000
 -19  -2  -1     402    1570                                                         400   -0.02    0.04  1.0000
  19   2   1       0    3900                                                           0   -0.02   -0.04  1.0000
 -18   3   1     602    1870                                                         680    0.92    0.11  1.0000
  17  -3  -1    3042    4250                                                        2570   -2.67    0.00  1.0000
 -17   3   1   11568    2280                                                       10629   -2.67    0.00  1.0000
  16  -3  -1       9    3960                                                           0    1.76    0.09  1.0000
 -16   3   1    3941    2290                                                        3580    1.76   -0.09  1.0000
  15  -3  -1       7    3700                                                           0    1.62   -0.05  1.0000
 -15   3   1    3369    2280                                                        3690    1.62    0.05  1.0000
 -14   3   1   70366    6629                                                       70433   -0.07   -0.04  1.0000
  13  -3  -1    3757    3760                                                        4270    2.42    0.00  1.0000
 -12   3   1   77119    7189                                                       80132   -3.21   -0.02  1.0000
  11  -3  -1    1196    3280                                                         740    4.41   -0.07  1.0000
  10  -3  -1   12031    3260                                                       12729   -1.88    0.06  1.0000
  10  -3  -1    9158    2860                                                        9769   -1.88    0.06  1.0000
   9  -3  -1      24    2290                                                           0   -2.95   -0.08  1.0000
   8  -3  -1   43651    5329                                                       44056   -0.58    0.13  1.0000
   8  -3  -1   55357    5879                                                       55814   -0.58    0.13  1.0000
   7  -3  -1   84997    7419                                                       81102    4.04   -0.03  1.0000
   7  -3  -1   78167    8219                                                       74433    4.04   -0.03  1.0000
   6  -3  -1  192472   20208                                                      202930   -7.03   -0.06  1.0000
   0   3   1    2248    1050                                                        4820  -13.16    0.25  1.0000
   1   3   1    6143    1120                                                        4420    7.11   -0.10  1.0000
  -2  -3  -1    2782     560                                                           0   31.54    0.20  1.0000
   8   3   1   47013    5869                                                       54225   -9.59   -0.08  1.0000
 -10  -3  -1     665    1490                                                        1020    3.67    0.08  1.0000
  10   3   1     530    3120                                                         850    3.67   -0.08  1.0000
 -11  -3  -1   12887    2620                                                       14379    3.82    0.09  1.0000
  11   3   1   12244    3400                                                       13699    3.82   -0.09  1.0000
 -12  -3  -1    8512    1620                                                        5779   -9.71   -0.11  1.0000
  12   3   1    1403    3240                                                         450   -9.71    0.11  1.0000
 -13  -3  -1      90    1470                                                           0    5.67    0.06  1.0000
  13   3   1      90    3130                                                           0    5.67   -0.06  1.0000
 -14  -3  -1       0    1450                                                           0    0.09    0.11  1.0000
  14   3   1       0    3120                                                           0    0.09   -0.11  1.0000
 -15  -3  -1    5822    1600                                                        6419   -2.28   -0.22  1.0000
  15   3   1     513    3180                                                         700   -2.28    0.22  1.0000
 -16  -3  -1    3707    1550                                                        2880    4.32   -0.02  1.0000
  16   3   1      52    3260                                                           0    4.32    0.02  1.0000
 -17  -3  -1       9    1550                                                           0   -1.80    0.14  1.0000
  17   3   1       9    3100                                                           0   -1.80   -0.14  1.0000
 -18  -3  -1     306    1700                                                         390   -1.36   -0.01  1.0000
 -19  -3  -1      13    1860                                                           0    2.13    0.00  1.0000
  17  -4  -1      14    4440                                                           0    2.21    0.03  1.0000
 -17   4   1     454    2200                                                         310    2.21   -0.03  1.0000
  16  -4  -1       0    4240                                                           0   -0.34   -0.11  1.0000
 -16   4   1       0    2300                                                           0   -0.34    0.11  1.0000
  15  -4  -1    1960    4100                                                        2230   -1.77    0.07  1.0000
 -15   4   1    5041    2150                                                        5469   -1.77   -0.07  1.0000
  14  -4  -1    7520    4000                                                        7099    1.47   -0.07  1.0000
 -14   4   1   11961    2120                                                       11429    1.47    0.07  1.0000
 -13   4   1   52962    5409                                                       58214   -6.66   -0.01  1.0000
  12  -4  -1    2387    3430                                                        1690    4.63   -0.08  1.0000
  11  -4  -1   42707    5929                                                       45515   -4.00    0.10  1.0000
  11  -4  -1   37937    4870                                                       40586   -4.00    0.10  1.0000
  10  -4  -1   14238    3940                                                       14009    0.58   -0.01  1.0000
  10  -4  -1   12393    2990                                                       12179    0.58   -0.01  1.0000
   9  -4  -1      24    2270                                                           0    2.93   -0.03  1.0000
   8  -4  -1      15    2530                                                           0    2.30   -0.08  1.0000
   8  -4  -1      15    2780                                                           0    2.30   -0.08  1.0000
   7  -4  -1   27887    4000                                                       29747   -3.28   -0.01  1.0000
   7  -4  -1   24946    4230                                                       26707   -3.28   -0.01  1.0000
   6  -4  -1  164408   14409                                                      156304    6.05   -0.04  1.0000
   6  -4  -1  135319   12559                                                      127977    6.05   -0.04  1.0000
   2  -4  -1   31884    3480                                                       36046   -6.76    0.05  1.0000
   0   4   1   28226    3790                                                       32197    6.83   -0.11  1.0000
  -1  -4  -1   26136    2470                                                       27647    2.75   -0.05  1.0000
   1   4   1   20110    3360                                                       21438    2.75    0.05  1.0000
  -2  -4  -1   72400    5359                                                       61574  -12.52   -0.15  1.0000
  -8  -4  -1    1408    1160                                                         620    7.55    0.05  1.0000
   8   4   1    2952    2200                                                        1740    7.55   -0.05  1.0000
  -9  -4  -1   16416    2710                                                       18078   -3.78    0.15  1.0000
   9   4   1   22538    3330                                                       24478   -3.78   -0.15  1.0000
 -10  -4  -1   41532    4250                                                       41546    0.02   -0.14  1.0000
  10   4   1   44662    5119                                                       44676    0.02    0.14  1.0000
 -11  -4  -1   43854    4630                                                       47375   -4.93    0.04  1.0000
  12   4   1    1683    3190                                                        2630    6.14   -0.05  1.0000
  13   4   1    1862    3300                                                        1330   -4.00   -0.01  1.0000
  14   4   1       0    3320                                                           0    0.16    0.10  1.0000
 -15  -4  -1      32    1520                                                           0    3.35    0.14  1.0000
  15   4   1      32    3130                                                           0    3.35   -0.14  1.0000
  16   4   1       2    3280                                                           0   -0.89    0.05  1.0000
 -17  -4  -1      17    1800                                                           0    2.47   -0.11  1.0000
 -18  -4  -1       5    1930                                                           0    1.39   -0.06  1.0000
  18   4   1       5    3270                                                           0    1.39    0.06  1.0000
 -19  -4  -1       8    2110                                                           0   -1.67    0.06  1.0000
 -17   5   1    4433    2320                                                        4540   -0.48    0.02  1.0000
  16  -5  -1       0    4180                                                           0    0.04    0.07  1.0000
 -16   5   1    2433    2280                                                        2440    0.04   -0.07  1.0000
  15  -5  -1    8375    4260                                                        7989    1.28   -0.15  1.0000
 -15   5   1   11829    2650                                                       11369    1.28    0.15  1.0000
  14  -5  -1   10884    4260                                                        9939   -2.77    0.08  1.0000
 -14   5   1    7732    1550                                                        6939   -2.77   -0.08  1.0000
  13  -5  -1    6356    4120                                                        5259    4.31    0.06  1.0000
  12  -5  -1    5326    3800                                                        4340   -4.25    0.05  1.0000
  11  -5  -1    6275    2260                                                        4560    6.99   -0.12  1.0000
  10  -5  -1    2398    1980                                                        2500   -0.62   -0.01  1.0000
   9  -5  -1    9427    2550                                                       10469   -3.12    0.13  1.0000
   9  -5  -1   11931    3400                                                       13099   -3.12    0.13  1.0000
   8  -5  -1   10445    2920                                                        9639   -2.41    0.05  1.0000
   8  -5  -1    1055    2350                                                         810   -2.41    0.05  1.0000
   7  -5  -1  212727   22448                                                      217068    2.80   -0.04  1.0000
   7  -5  -1  227657   19388                                                      232147    2.80   -0.04  1.0000
   6  -5  -1    2969    2660                                                        3890   -4.71    0.06  1.0000
   6  -5  -1    4402    1970                                                        5509   -4.71    0.06  1.0000
   4  -5  -1  117488   11779                                                      125877   -7.19    0.05  1.0000
   4  -5  -1  136378   13659                                                      145405   -7.19    0.05  1.0000
   3  -5  -1   42909    4280                                                       44596    2.41    0.14  1.0000
   2  -5  -1   15234    1670                                                       11519    9.63    0.03  1.0000
  -2   5   1   13420    1580                                                        9949    9.63   -0.03  1.0000
   1  -5  -1   13582    1750                                                       16318    6.70   -0.01  1.0000
  -1   5   1    9330    2140                                                       11619    6.70    0.01  1.0000
   0  -5  -1   52782    4990                                                       56534   -4.80   -0.03  1.0000
   0   5   1   53072    5979                                                       56834   -4.80    0.03  1.0000
  -1  -5  -1   42060    3700                                                       40186   -2.76   -0.04  1.0000
   1   5   1   41845    4770                                                       39976   -2.76    0.04  1.0000
  -8  -5  -1  164830   14819                                                      169643   -3.52    0.00  1.0000
   8   5   1  168724   17218                                                      173593   -3.52    0.00  1.0000
  -9  -5  -1   61193    5779                                                       59164    2.47   -0.12  1.0000
   9   5   1   67332    6719                                                       65203    2.47    0.12  1.0000
  10   5   1   12555    2940                                                       12779   -0.59   -0.20  1.0000
  11   5   1    6241    2370                                                        4910    5.34   -0.02  1.0000
 -12  -5  -1   62932    6359                                                       68223   -6.18   -0.15  1.0000
 -13  -5  -1      11    1670                                                           0    2.01    0.05  1.0000
  13   5   1     604    3190                                                         780    2.01   -0.05  1.0000
 -14  -5  -1    2530    1740                                                        2170    2.22    0.05  1.0000
  14   5   1      14    3360                                                           0    2.22   -0.05  1.0000
 -15  -5  -1     570    1780                                                         450   -1.59   -0.23  1.0000
  15   5   1       7    3500                                                           0   -1.59    0.23  1.0000
 -16  -5  -1    5153    1990                                                        5429    1.13    0.12  1.0000
  16   5   1       4    3440                                                           0    1.13   -0.12  1.0000
 -17  -5  -1       0    2050                                                           0   -0.18    0.03  1.0000
  17   5   1       0    3380                                                           0   -0.18   -0.03  1.0000
 -18  -5  -1       5    2160                                                           0   -1.39    0.07  1.0000
  18   5   1       5    3440                                                           0   -1.39   -0.07  1.0000
 -19  -5  -1       4    2070                                                           0   -1.24   -0.10  1.0000
  17  -6  -1       1    5009                                                           0    0.48   -0.01  1.0000
 -17   6   1     578    2310                                                         540    0.48    0.01  1.0000
  15  -6  -1    3213    4640                                                        2910    1.64    0.14  1.0000
 -15   6   1    2517    1390                                                        2250    1.64   -0.14  1.0000
  14  -6  -1       5    4390                                                           0    1.30   -0.08  1.0000
 -14   6   1    1421    1410                                                        1590    1.30    0.08  1.0000
  13  -6  -1       9    4100                                                           0   -1.76   -0.09  1.0000
  12  -6  -1    4774    2400                                                        5159   -1.63    0.08  1.0000
  10  -6  -1   15818    3060                                                       17668    4.28    0.00  1.0000
   9  -6  -1   34203    5109                                                       32997    1.97   -0.21  1.0000
   9  -6  -1   32788    4100                                                       31607    1.97   -0.21  1.0000
   8  -6  -1   70863    7369                                                       71393   -0.59    0.02  1.0000
   8  -6  -1   54341    6149                                                       54805   -0.59    0.02  1.0000
   7  -6  -1    2538    2940                                                        2070   -2.92   -0.02  1.0000
   7  -6  -1    6012    1980                                                        5279   -2.92   -0.02  1.0000
   6  -6  -1    7025    1950                                                        6119    3.35   -0.03  1.0000
   6  -6  -1    6134    2760                                                        5289    3.35   -0.03  1.0000
   5  -6  -1    1301    2220                                                         970   -2.95    0.08  1.0000
   5  -6  -1    2852    1540                                                        2350   -2.95    0.08  1.0000
   4  -6  -1   55949    4820                                                       50465    7.11   -0.03  1.0000
   3  -6  -1      78    1100                                                           0   -5.27   -0.03  1.0000
   2  -6  -1   19937    2030                                                       18418    3.28   -0.10  1.0000
  -2   6   1   13797    2450                                                       12539    3.28    0.10  1.0000
   0  -6  -1    5271    1020                                                        5949   -2.71    0.02  1.0000
   0   6   1    5818    1940                                                        6529   -2.71   -0.02  1.0000
  -1  -6  -1   42283    4010                                                       41786    0.73   -0.02  1.0000
   1   6   1   46436    5109                                                       45915    0.73    0.02  1.0000
  -2  -6  -1   40348    4290                                                       45965   -8.09   -0.13  1.0000
   2   6   1   43312    5449                                                       49125   -8.09    0.13  1.0000
  -8  -6  -1     901    1450                                                         640    2.82    0.15  1.0000
   8   6   1      22    2130                                                           0    2.82   -0.15  1.0000
  10   6   1   52179    6099                                                       52945   -1.00    0.05  1.0000
 -11  -6  -1    4081    1820                                                        3290   -3.90   -0.04  1.0000
  11   6   1      43    2250                                                           0   -3.90    0.04  1.0000
  12   6   1   42743    4860                                                       39426    4.89   -0.03  1.0000
 -13  -6  -1   13368    2980                                                       13029    0.88   -0.03  1.0000
  13   6   1    3554    2980                                                        3380    0.88    0.03  1.0000
 -14  -6  -1    2633    2010                                                        2890   -1.46   -0.05  1.0000
  14   6   1       6    3290                                                           0   -1.46    0.05  1.0000
  15   6   1    1648    3650                                                        1170    3.82   -0.15  1.0000
  16   6   1      66    3720                                                          50   -0.64    0.12  1.0000
 -17  -6  -1    2015    2090                                                        2150   -0.88    0.00  1.0000
  17   6   1       2    3340                                                           0   -0.88    0.00  1.0000
 -18  -6  -1    5197    2170                                                        5139   -0.24   -0.01  1.0000
  18   6   1       0    3500                                                           0   -0.24    0.01  1.0000
 -16   7   1    2133    1800                                                        1590    3.77   -0.05  1.0000
  15  -7  -1    2532    5069                                                        3050   -2.94   -0.04  1.0000
 -15   7   1    2787    1430                                                        3330   -2.94    0.04  1.0000
  14  -7  -1    8434    4950                                                        8649   -0.70    0.01  1.0000
  13  -7  -1      24    4480                                                           0    2.95    0.13  1.0000
  12  -7  -1   25407    3350                                                       22758    5.11   -0.05  1.0000
  11  -7  -1    3904    3990                                                        3840    0.31   -0.02  1.0000
   9  -7  -1       5    3300                                                           0   -1.27    0.22  1.0000
   9  -7  -1    5538    2100                                                        5859   -1.27    0.22  1.0000
   8  -7  -1   62446    6159                                                       64264   -2.16   -0.07  1.0000
   8  -7  -1   59233    7269                                                       61004   -2.16   -0.07  1.0000
   7  -7  -1   88761   10089                                                       90061   -1.30    0.04  1.0000
   7  -7  -1   99593    8619                                                      100970   -1.30    0.04  1.0000
   6  -7  -1   10983    2740                                                       11729   -2.09    0.11  1.0000
   5  -7  -1   63816    5669                                                       59364    5.37   -0.11  1.0000
  -5   7   1   66283    6389                                                       61744    5.37    0.11  1.0000
  -4   7   1     625    1340                                                         300   -4.60   -0.07  1.0000
   3  -7  -1   80035    6369                                                       76292    4.00    0.11  1.0000
  -3   7   1   71458    7449                                                       67923    4.00   -0.11  1.0000
   2  -7  -1    8690    1710                                                       10189   -4.62    0.03  1.0000
  -2   7   1   11887    2170                                                       13629   -4.62   -0.03  1.0000
   1  -7  -1  108655    8769                                                       99760    8.24   -0.07  1.0000
  -1   7   1  112787    9859                                                      103720    8.24    0.07  1.0000
   0  -7  -1  116010   10479                                                      117548   -1.35   -0.03  1.0000
   0   7   1  130923   12089                                                      132557   -1.35    0.03  1.0000
   0   7   1  113626   11749                                                      115148   -1.35    0.03  1.0000
  -1  -7  -1   47906    4100                                                       49705   -2.44   -0.03  1.0000
   1   7   1   35456    5069                                                       37006   -2.44    0.03  1.0000
  -4  -7  -1   49965    4000                                                       46455   -4.78   -0.15  1.0000
   4   7   1   43476    5119                                                       40206   -4.78    0.15  1.0000
  -5  -7  -1    9367    1550                                                        9429    0.19   -0.07  1.0000
   5   7   1    7603    2720                                                        7659    0.19    0.07  1.0000
  -6  -7  -1      28     980                                                         170    4.62    0.15  1.0000
  -8  -7  -1   27196    3310                                                       25157   -3.77   -0.29  1.0000
   8   7   1   19645    3630                                                       17918   -3.77    0.29  1.0000
  -9  -7  -1   33503    4130                                                       34777    2.06    0.04  1.0000
   9   7   1   35338    4460                                                       36646    2.06   -0.04  1.0000
 -10  -7  -1   11089    2860                                                       11959   -2.42    0.10  1.0000
  10   7   1   10963    3350                                                       11829   -2.42   -0.10  1.0000
  11   7   1   28814    4270                                                       30477    2.89    0.05  1.0000
 -12  -7  -1    1338    1780                                                        1400   -0.50   -0.06  1.0000
  12   7   1       1    2420                                                           0   -0.50    0.06  1.0000
  14   7   1   12755    3280                                                       11309    3.94    0.04  1.0000
  15   7   1    3357    3470                                                        2750   -3.29    0.06  1.0000
 -17  -7  -1    5677    2270                                                        5469   -0.83    0.00  1.0000
  17   7   1       2    3760                                                           0   -0.83    0.00  1.0000
 -18  -7  -1       2    2290                                                           0    0.85    0.06  1.0000
  18   7   1       2    3430                                                           0    0.85   -0.06  1.0000
  16  -8  -1    2294    5199                                                        2050   -1.57   -0.02  1.0000
 -16   8   1    3210    1530                                                        2920   -1.57    0.02  1.0000
  15  -8  -1    1528    5049                                                        1400    1.00    0.07  1.0000
  14  -8  -1    3287    4880                                                        2740    2.98    0.04  1.0000
  11  -8  -1   14575    2750                                                       13929   -1.62    0.02  1.0000
  11  -8  -1    3199    3780                                                        2900   -1.62    0.02  1.0000
  10  -8  -1   35196    4080                                                       34437    1.22   -0.05  1.0000
   9  -8  -1  114213   11889                                                      114499    0.25   -0.10  1.0000
   9  -8  -1  108600    9979                                                      108879    0.25   -0.10  1.0000
   8  -8  -1    5123    1970                                                        4530    2.56   -0.02  1.0000
   7  -8  -1   33071    3810                                                       32307   -1.26   -0.01  1.0000
  -6   8   1   13918    2930                                                       14499   -1.46    0.00  1.0000
   5  -8  -1   15647    2570                                                       15488   -0.38    0.10  1.0000
  -5   8   1   16481    2930                                                       16318   -0.38   -0.10  1.0000
   4  -8  -1    1580    1210                                                        2720    7.42   -0.12  1.0000
  -4   8   1    1595    1430                                                        2740    7.42    0.12  1.0000
   3  -8  -1   30338    3120                                                       30057   -0.48   -0.09  1.0000
  -3   8   1   32930    3830                                                       32637   -0.48    0.09  1.0000
   1  -8  -1    8890    1600                                                        6719   -7.37   -0.06  1.0000
  -1   8   1   11533    1770                                                        9039   -7.37    0.06  1.0000
  -1   8   1   11747    2060                                                        9229   -7.37    0.06  1.0000
   0  -8  -1   55799    4810                                                       53605    2.80    0.03  1.0000
   0   8   1   46895    5939                                                       44886    2.80   -0.03  1.0000
   0   8   1   61549    5369                                                       59244    2.80   -0.03  1.0000
  -2  -8  -1   13823    1960                                                       13219    1.55   -0.25  1.0000
   2   8   1   14907    3820                                                       14279    1.55    0.25  1.0000
  -3  -8  -1   19486    1960                                                       18248   -2.69    0.05  1.0000
   3   8   1   17034    2900                                                       15878   -2.69   -0.05  1.0000
  -4  -8  -1   32549    2610                                                       27837    8.11    0.15  1.0000
   4   8   1   26273    3980                                                       22058    8.11   -0.15  1.0000
  -5  -8  -1  163978   13809                                                      161344   -1.95    0.01  1.0000
   5   8   1  163797   16288                                                      161164   -1.95   -0.01  1.0000
  -6  -8  -1    2342     980                                                        2100    1.53   -0.11  1.0000
  -7  -8  -1    1432    1020                                                         850   -5.19   -0.08  1.0000
   9   8   1   12008    2860                                                       12059    0.14    0.09  1.0000
  10   8   1   16516    3430                                                       16728    0.49    0.01  1.0000
 -11  -8  -1       7    1990                                                           0   -1.58    0.03  1.0000
  11   8   1       7    2790                                                           0   -1.58   -0.03  1.0000
 -13  -8  -1    2539    2220                                                        3250    3.96   -0.08  1.0000
  13   8   1      44    2580                                                           0    3.96    0.08  1.0000
 -14  -8  -1      65    2250                                                           0   -4.83    0.00  1.0000
  14   8   1     297    2590                                                         640   -4.83    0.00  1.0000
 -15  -8  -1    8471    2510                                                        9539    3.37    0.16  1.0000
  15   8   1     356    3290                                                         600    3.37   -0.16  1.0000
 -16  -8  -1    2166    2470                                                        2170   -0.02   -0.07  1.0000
  16   8   1       0    3510                                                           0   -0.02    0.07  1.0000
 -17  -8  -1    9088    2740                                                        8459   -2.01   -0.02  1.0000
  17   8   1      11    3810                                                           0   -2.01    0.02  1.0000
 -18  -8  -1     659    2600                                                         420   -3.09   -0.01  1.0000
 -15   9   1   19171    2840                                                       19758   -1.26    0.04  1.0000
  13  -9  -1   56714    5509                                                       56204    0.64    0.07  1.0000
  12  -9  -1   30955    3910                                                       36936    9.72    0.02  1.0000
  11  -9  -1   15315    2940                                                       15988   -1.61   -0.04  1.0000
  10  -9  -1   25787    3750                                                       28647   -5.19    0.05  1.0000
   9  -9  -1   27881    3630                                                       27957   -0.14    0.07  1.0000
   8  -9  -1   38409    3620                                                       35946   -3.82    0.09  1.0000
  -8   9   1   26871    4200                                                       24818   -3.82   -0.09  1.0000
   6  -9  -1     879    1570                                                         420    5.48   -0.03  1.0000
   5  -9  -1    2232    1350                                                        2430   -1.23    0.01  1.0000
  -5   9   1     698    1560                                                         810   -1.23   -0.01  1.0000
   4  -9  -1   34465    3430                                                       30917   -5.87    0.11  1.0000
  -4   9   1   39049    4110                                                       35266   -5.87   -0.11  1.0000
   3  -9  -1   19588    2420                                                       21428    3.84   -0.03  1.0000
   1  -9  -1      24     980                                                           0   -2.93    0.11  1.0000
  -1   9   1    2274    1970                                                        1830   -2.93   -0.11  1.0000
  -1   9   1    1803     180                                                        1410   -2.93   -0.11  1.0000
   0  -9  -1  100870    8829                                                      103850    2.79   -0.10  1.0000
   0   9   1   92122   10139                                                       94971    2.79    0.10  1.0000
   0   9   1  104614   10119                                                      107649    2.79    0.10  1.0000
   2   9   1    3793    2160                                                        3610   -0.90   -0.19  1.0000
  -4  -9  -1   37564    3380                                                       39616   -3.12   -0.07  1.0000
   4   9   1   27158    4640                                                       28907   -3.12    0.07  1.0000
  -6  -9  -1   18691    2440                                                       18918    0.49    0.07  1.0000
  -7  -9  -1   14043    2060                                                       14949    2.25    0.14  1.0000
   7   9   1   13490    3290                                                       14379    2.25   -0.14  1.0000
  -8  -9  -1     658    1100                                                         860   -2.20   -0.09  1.0000
  -9  -9  -1      53    1250                                                           0   -4.34    0.03  1.0000
   9   9   1     435    2610                                                         790   -4.34   -0.03  1.0000
 -10  -9  -1   13952    2970                                                       15458    3.72   -0.08  1.0000
  10   9   1   13060    3290                                                       14519    3.72    0.08  1.0000
 -11  -9  -1    9633    2090                                                        9499    0.41   -0.11  1.0000
  11   9   1    4774    3010                                                        4680    0.41    0.11  1.0000
 -12  -9  -1   10447    2360                                                       10229   -0.64    0.14  1.0000
 -13  -9  -1    8136    2420                                                        8529   -1.29   -0.02  1.0000
  13   9   1     748    2650                                                         870   -1.29    0.02  1.0000
 -15  -9  -1      60    2620                                                           0   -4.61   -0.10  1.0000
  15   9   1    1636    2880                                                        2320   -4.61    0.10  1.0000
 -16  -9  -1    3616    2670                                                        3310   -1.55    0.09  1.0000
  16   9   1       7    3350                                                           0   -1.55   -0.09  1.0000
  17   9   1      14    3770                                                           0    2.20   -0.01  1.0000
 -18  -9  -1     214    2630                                                         160    1.18   -0.02  1.0000
  13 -10  -1   51096    5249                                                       52765   -2.19   -0.06  1.0000
  12 -10  -1   25928    3590                                                       32687  -11.82   -0.14  1.0000
  10 -10  -1   22894    3190                                                       20108   -5.68    0.02  1.0000
   8 -10  -1   24252    3260                                                       27747    6.49    0.00  1.0000
  -8  10   1   16975    3910                                                       19918    6.49    0.00  1.0000
   7 -10  -1   50509    5419                                                       51335   -1.09    0.06  1.0000
  -7  10   1   60242    6369                                                       61144   -1.09   -0.06  1.0000
   6 -10  -1    5228    1520                                                        4340   -3.84   -0.05  1.0000
   5 -10  -1   88919    7819                                                       84991    3.98   -0.03  1.0000
  -5  10   1   95044    9139                                                       90981    3.98    0.03  1.0000
  -3  10   1   30397    3830                                                       27277   -5.50    0.00  1.0000
  -2  10   1     712    2180                                                         690   -0.25   -0.01  1.0000
  -2  10   1    4879    1630                                                        4820   -0.25   -0.01  1.0000
   1 -10  -1    7596    1790                                                        8389    2.65   -0.16  1.0000
  -1  10   1    7282    2440                                                        8059    2.65    0.16  1.0000
  -1 -10  -1   53896    4710                                                       55254    1.74   -0.03  1.0000
   1  10   1   47282    5979                                                       48555    1.74    0.03  1.0000
   1  10   1   46651    5169                                                       47915    1.74    0.03  1.0000
  -4 -10  -1    3126     970                                                        2480    3.66    0.22  1.0000
   4  10   1    5575    2470                                                        4700    3.66   -0.22  1.0000
  -5 -10  -1    7306    1740                                                        7169    0.48    0.08  1.0000
  -6 -10  -1    9591    1830                                                        7869   -5.52    0.05  1.0000
   6  10   1    8094    3060                                                        6519   -5.52   -0.05  1.0000
  -7 -10  -1   24402    2810                                                       24428    0.05   -0.24  1.0000
  -8 -10  -1    1183    1160                                                        1160    0.20    0.19  1.0000
   8  10   1       0    2780                                                           0    0.20   -0.19  1.0000
  -9 -10  -1   22351    2800                                                       24428    4.06   -0.05  1.0000
   9  10   1   21481    4200                                                       23518    4.06    0.05  1.0000
 -10 -10  -1       8    1220                                                           0   -1.73    0.07  1.0000
  10  10   1    3127    2660                                                        3460   -1.73   -0.07  1.0000
 -11 -10  -1   40569    3850                                                       41406    1.24    0.06  1.0000
  11  10   1   28416    4630                                                       29117    1.24   -0.06  1.0000
 -12 -10  -1   20810    3190                                                       20318    1.03   -0.10  1.0000
 -13 -10  -1    8399    2220                                                        7969   -1.42    0.01  1.0000
  13  10   1       6    2960                                                           0   -1.42   -0.01  1.0000
 -14 -10  -1       3    2230                                                           0   -1.10    0.00  1.0000
  14  10   1     650    2640                                                         560   -1.10    0.00  1.0000
 -15 -10  -1   11737    2600                                                       11609   -0.35    0.13  1.0000
 -16 -10  -1      18    2380                                                           0    2.53   -0.08  1.0000
  16  10   1      18    3070                                                           0    2.53    0.08  1.0000
 -17 -10  -1    5032    2450                                                        4430   -2.62    0.03  1.0000
  17  10   1      19    3530                                                           0   -2.62   -0.03  1.0000
 -14  11   1    4532    3200                                                        4500    0.14    0.08  1.0000
 -13  11   1      33    3000                                                           0   -3.41    0.01  1.0000
 -12  11   1     235    2830                                                           0    9.16   -0.17  1.0000
  10 -11  -1   20786    3480                                                       24938    8.22    0.05  1.0000
 -10  11   1   19628    4460                                                       23668    8.22   -0.05  1.0000
   8 -11  -1   46336    4920                                                       49975   -4.96   -0.04  1.0000
  -8  11   1   43844    6019                                                       47385   -4.96    0.04  1.0000
   7 -11  -1    7528    2620                                                       10119    8.27    0.05  1.0000
  -7  11   1   12842    3140                                                       16168    8.27   -0.05  1.0000
   6 -11  -1   15209    2560                                                       16748    3.64   -0.03  1.0000
   2 -11  -1   15568    1900                                                       14199   -3.36   -0.04  1.0000
  -2  11   1   16007    4010                                                       14619   -3.36    0.04  1.0000
   1 -11  -1   39465    3800                                                       38696   -1.16    0.08  1.0000
  -1  11   1   34556    5579                                                       33837   -1.16   -0.08  1.0000
  -1  11   1   42928    4200                                                       42126   -1.16   -0.08  1.0000
   0  11   1      45    2270                                                           0    4.00    0.15  1.0000
   1  11   1   21968    4700                                                       22368    0.80    0.05  1.0000
   1  11   1   28293    2990                                                       28747    0.80    0.05  1.0000
  -2 -11  -1   40619    4120                                                       39636   -1.47    0.23  1.0000
   2  11   1   47114    4500                                                       46055   -1.47   -0.23  1.0000
   2  11   1   41884    5589                                                       40886   -1.47   -0.23  1.0000
  -4 -11  -1   66096    5519                                                       62274   -4.51   -0.33  1.0000
   4  11   1   64077    6779                                                       60314   -4.51    0.33  1.0000
  -5 -11  -1   40479    3680                                                       40746   -0.40    0.23  1.0000
   5  11   1   34809    5159                                                       35056   -0.40   -0.23  1.0000
   6  11   1     300    2890                                                         130    3.53    0.23  1.0000
  -7 -11  -1   13051    2120                                                       13269   -0.57    0.24  1.0000
  -8 -11  -1    1822    1270                                                        1770    0.37   -0.15  1.0000
   8  11   1       0    2830                                                           0    0.37    0.15  1.0000
   9  11   1    6779    3150                                                        7099   -1.15   -0.13  1.0000
 -10 -11  -1    8202    1500                                                        8049    0.51   -0.35  1.0000
 -11 -11  -1    2063    1400                                                        2470    2.56    0.08  1.0000
  11  11   1    2255    2600                                                        2680    2.56   -0.08  1.0000
 -12 -11  -1    9007    2300                                                       10739   -5.22    0.01  1.0000
 -13 -11  -1      30    1620                                                           0    3.28    0.05  1.0000
  14  11   1    2200    2930                                                        2470   -1.67   -0.04  1.0000
 -15 -11  -1   11998    2730                                                       11789   -0.57   -0.14  1.0000
  15  11   1    2903    2980                                                        2800   -0.57    0.14  1.0000
 -16 -11  -1      16    1960                                                           0   -2.40    0.04  1.0000
  16  11   1      16    2860                                                           0   -2.40   -0.04  1.0000
 -17 -11  -1   10987    3020                                                       12169    3.28   -0.03  1.0000
 -13  12   1   20539    5179                                                       21618   -2.22   -0.11  1.0000
 -12  12   1   56561    6889                                                       52245   -5.53    0.24  1.0000
 -11  12   1   25329    4540                                                       23658    3.19   -0.07  1.0000
 -10  12   1   97266    9959                                                       91621   -5.49   -0.03  1.0000
  -9  12   1   76699    9459                                                       87671   11.45    0.04  1.0000
   8 -12  -1   12458    2870                                                       14119    4.31    0.04  1.0000
  -8  12   1   17376    3690                                                       19328    4.31   -0.04  1.0000
  -7  12   1    7490    2230                                                        5919   -5.75    0.08  1.0000
   6 -12  -1   35031    3990                                                       34827   -0.33    0.08  1.0000
  -6  12   1   44215    4930                                                       43986   -0.33   -0.08  1.0000
   5 -12  -1   27596    3240                                                       29177    2.81   -0.06  1.0000
  -5  12   1   28870    4330                                                       30487    2.81    0.06  1.0000
   4 -12  -1   32250    3510                                                       33657    2.32   -0.12  1.0000
  -4  12   1   35020    4810                                                       36486    2.32    0.12  1.0000
   3 -12  -1   38643    3360                                                       34307   -6.79    0.09  1.0000
  -3  12   1   29210    4999                                                       25457   -6.79   -0.09  1.0000
  -3  12   1   39629    4120                                                       35236   -6.79   -0.09  1.0000
   2 -12  -1   51110    5139                                                       54675    4.64   -0.09  1.0000
  -2  12   1   58358    6889                                                       62164    4.64    0.09  1.0000
  -1  12   1   45679    5999                                                       45485   -0.27    0.05  1.0000
   0 -12  -1   35793    3110                                                       32987   -4.52    0.12  1.0000
   0  12   1   30618    4910                                                       28027   -4.52   -0.12  1.0000
   0  12   1   30189    3370                                                       27617   -4.52   -0.12  1.0000
  -2 -12  -1   26028    3000                                                       26577    1.01   -0.07  1.0000
   2  12   1   28670    3170                                                       29247    1.01    0.07  1.0000
   2  12   1   23595    4830                                                       24118    1.01    0.07  1.0000
   3  12   1   10502    2590                                                       10949   -1.29    0.20  1.0000
  -4 -12  -1   92888    8079                                                       96020    3.05    0.46  1.0000
   4  12   1   85102    9579                                                       88101    3.05   -0.46  1.0000
  -5 -12  -1     646    1200                                                         730    0.96   -0.08  1.0000
  -6 -12  -1   10202    2040                                                       12169   -5.57    0.19  1.0000
   6  12   1   13702    3630                                                       15968   -5.57   -0.19  1.0000
  -7 -12  -1    6161    1250                                                        5709    1.75   -0.25  1.0000
   7  12   1    3182    3180                                                        2860    1.75    0.25  1.0000
   8  12   1      22    2990                                                           0    2.81   -0.02  1.0000
  -9 -12  -1   10187    1690                                                       10569   -1.12   -0.12  1.0000
 -10 -12  -1      24    1550                                                           0    2.88    0.38  1.0000
  10  12   1    3607    3030                                                        4210    2.88   -0.38  1.0000
 -11 -12  -1    4284    1630                                                        5579   -5.53   -0.17  1.0000
  11  12   1    4653    2950                                                        5999   -5.53    0.17  1.0000
 -12 -12  -1    3285    1530                                                        4360    5.21    0.05  1.0000
  12  12   1     924    2830                                                        1530    5.21   -0.05  1.0000
 -13 -12  -1     100    1560                                                           0   -5.99   -0.06  1.0000
  13  12   1     100    3220                                                           0   -5.99    0.06  1.0000
  14  12   1     511    3180                                                         490    0.28   -0.04  1.0000
 -15 -12  -1      15    1730                                                           0    2.35    0.06  1.0000
  15  12   1     499    2720                                                         690    2.35   -0.06  1.0000
 -16 -12  -1       1    1790                                                           0    0.58   -0.02  1.0000
 -13  13   1   34958    6039                                                       38296    5.22    0.12  1.0000
 -12  13   1   26155    5089                                                       26687    0.94   -0.33  1.0000
 -11  13   1   29720    4990                                                       29087   -1.10    0.11  1.0000
 -10  13   1   35978    5769                                                       43226   10.90    0.08  1.0000
  -9  13   1  180147   16948                                                      165583  -10.48   -0.10  1.0000
  -8  13   1   47849    5769                                                       44186   -5.11    0.08  1.0000
  -7  13   1   17059    4010                                                       21848   10.29   -0.01  1.0000
   6 -13  -1   25476    3060                                                       27577   -3.86    0.00  1.0000
  -6  13   1   18463    4340                                                       20258   -3.86    0.00  1.0000
   5 -13  -1   10557    2060                                                        9509   -3.13    0.03  1.0000
   4 -13  -1   19703    2580                                                       20478   -1.63   -0.01  1.0000
   3 -13  -1   25023    2820                                                       24098    1.76    0.02  1.0000
  -2  13   1    1454    2920                                                        2000   -3.94   -0.01  1.0000
   1 -13  -1    8153    1940                                                        7999    0.51    0.15  1.0000
  -1  13   1    4849    2790                                                        4730    0.51   -0.15  1.0000
   0 -13  -1   12672    2130                                                       10789    5.21   -0.37  1.0000
   0  13   1   13700    2100                                                       11739    5.21    0.37  1.0000
  -2 -13  -1   16640    2770                                                       16418    0.52    0.15  1.0000
   2  13   1   24548    2590                                                       24278    0.52   -0.15  1.0000
   2  13   1   16600    4670                                                       16378    0.52   -0.15  1.0000
   3  13   1    9381    2480                                                        9499   -0.36   -0.24  1.0000
  -4 -13  -1     607    1200                                                         410   -2.63   -0.57  1.0000
   4  13   1    2466    2510                                                        2050   -2.63    0.57  1.0000
  -5 -13  -1   32568    3130                                                       31247   -2.21    0.15  1.0000
   5  13   1   29872    4720                                                       28607   -2.21   -0.15  1.0000
  -6 -13  -1     976    1130                                                        2180    9.24   -0.16  1.0000
   6  13   1     239    2880                                                           0    9.24    0.16  1.0000
   7  13   1      18    3120                                                           0   -2.50    0.01  1.0000
   8  13   1   14419    3920                                                       13609   -2.05   -0.02  1.0000
   9  13   1   11259    3700                                                       12769    4.12    0.03  1.0000
  10  13   1    4712    3340                                                        3750   -4.43    0.21  1.0000
 -11 -13  -1    8831    2450                                                        9909    3.33    0.08  1.0000
 -12 -13  -1    1226    1780                                                         720   -4.89   -0.03  1.0000
  12  13   1    2513    2780                                                        1760   -4.89    0.03  1.0000
 -13 -13  -1   24033    3530                                                       25197    2.22    0.06  1.0000
 -14 -13  -1    3297    1800                                                        3520    1.14    0.10  1.0000
  14  13   1     115    3380                                                         160    1.14   -0.10  1.0000
 -15 -13  -1       1    1700                                                           0   -0.67   -0.04  1.0000
  15  13   1       1    2930                                                           0   -0.67    0.04  1.0000
 -12  14   1   24629    5059                                                       26777    4.00    0.21  1.0000
 -11  14   1   33844    5329                                                       32347   -2.46   -0.07  1.0000
 -10  14   1   24573    4980                                                       27807   -5.98   -0.04  1.0000
  -9  14   1   26915    5339                                                       34167   12.43    0.05  1.0000
  -8  14   1   44993    6009                                                       46055    1.49   -0.11  1.0000
  -7  14   1   39541    5199                                                       33127  -10.07    0.11  1.0000
  -6  14   1      61    2600                                                         130    2.15   -0.05  1.0000
  -5  14   1    7999    2740                                                        7449    1.87    0.04  1.0000
   4 -14  -1   27467    2880                                                       24648   -5.22    0.04  1.0000
   3 -14  -1   52897    4770                                                       51305    2.09   -0.22  1.0000
  -3  14   1   49789    6869                                                       48245    2.09    0.22  1.0000
   2 -14  -1   20209    2530                                                       22388    4.47    0.15  1.0000
  -2  14   1   18567    5129                                                       20658    4.47   -0.15  1.0000
   1 -14  -1   26082    2970                                                       27787   -3.11   -0.13  1.0000
  -1  14   1   20880    5239                                                       22408   -3.11    0.13  1.0000
   0 -14  -1   23571    2780                                                       23318   -0.49    0.41  1.0000
   0  14   1   21389    2860                                                       21148   -0.49   -0.41  1.0000
  -1 -14  -1    5781    1500                                                        5249    2.14   -0.23  1.0000
   1  14   1    3746    2740                                                        3320    2.14    0.23  1.0000
  -2 -14  -1    4393    1450                                                        4080   -1.44    0.06  1.0000
   2  14   1    2652    2720                                                        2410   -1.44   -0.06  1.0000
  -3 -14  -1      26    1280                                                           0    3.05   -0.26  1.0000
  -4 -14  -1    3709    1380                                                        3590    0.59    0.63  1.0000
  -5 -14  -1   15368    2570                                                       16598    2.91   -0.49  1.0000
   5  14   1   17063    4100                                                       18358    2.91    0.49  1.0000
  -6 -14  -1   26413    2800                                                       22698   -7.09    0.26  1.0000
   6  14   1   32525    4470                                                       28387   -7.09   -0.26  1.0000
  -7 -14  -1      23    1130                                                           0    2.88    0.14  1.0000
   7  14   1      23    3260                                                           0    2.88   -0.14  1.0000
   8  14   1    1493    3330                                                        1710    1.59    0.33  1.0000
   9  14   1   12211    3340                                                       10579   -4.57   -0.04  1.0000
  10  14   1    6055    3520                                                        6349    1.11   -0.30  1.0000
 -11 -14  -1   15545    2790                                                       17158   -3.77    0.06  1.0000
  11  14   1   19027    4180                                                       20808   -3.77   -0.06  1.0000
 -12 -14  -1      35    1650                                                           0    3.52   -0.02  1.0000
  12  14   1    4155    2860                                                        4950    3.52    0.02  1.0000
 -13 -14  -1    5593    1910                                                        6049   -1.79    0.02  1.0000
  13  14   1    4681    3360                                                        5099   -1.79   -0.02  1.0000
 -14 -14  -1       4    1830                                                           0   -1.25   -0.21  1.0000
  14  14   1       4    3360                                                           0   -1.25    0.21  1.0000
 -11  15   1   30405    5459                                                       32527    3.58   -0.02  1.0000
 -10  15   1   39316    5559                                                       36096    4.96    0.16  1.0000
  -9  15   1   29084    5499                                                       36216  -11.82   -0.06  1.0000
  -8  15   1   42670    6109                                                       42636    0.05    0.07  1.0000
  -7  15   1   18444    4700                                                       19968    3.29   -0.10  1.0000
  -6  15   1      45    2900                                                           0   -3.99    0.10  1.0000
  -5  15   1    2015    3620                                                        1790    1.55   -0.05  1.0000
  -3  15   1     837    3450                                                        1050   -2.08   -0.14  1.0000
   2 -15  -1   13904    2120                                                       13219   -1.76   -0.03  1.0000
  -2  15   1   10946    3440                                                       10339   -1.76    0.03  1.0000
   1 -15  -1    3586    1300                                                        2800    4.17    0.14  1.0000
  -1  15   1    1440    2810                                                         960    4.17   -0.14  1.0000
  -1  15   1     781    1680                                                         440    4.17   -0.14  1.0000
   0 -15  -1    8940    2310                                                        8779   -0.51   -0.30  1.0000
   0  15   1   12973    2030                                                       12779   -0.51    0.30  1.0000
  -2 -15  -1   28151    3550                                                       28857    1.25   -0.12  1.0000
   2  15   1   26463    5389                                                       27147    1.25    0.12  1.0000
   2  15   1   35415    3890                                                       36206    1.25    0.12  1.0000
  -3 -15  -1   18086    2630                                                       16908   -2.66    0.19  1.0000
  -4 -15  -1    3488    1510                                                        3590    0.51   -0.43  1.0000
   4  15   1    2376    2880                                                        2460    0.51    0.43  1.0000
  -5 -15  -1     529    1190                                                         400   -1.79    0.06  1.0000
   5  15   1    2755    3220                                                        2450   -1.79   -0.06  1.0000
  -6 -15  -1    8821    2320                                                       10819    6.04   -0.32  1.0000
  -7 -15  -1   19491    2550                                                       19278   -0.46   -0.03  1.0000
   7  15   1   17892    4400                                                       17688   -0.46    0.03  1.0000
   8  15   1    9541    3700                                                       10989   -4.27   -0.26  1.0000
   9  15   1    9069    3490                                                       10249    3.59   -0.10  1.0000
 -10 -15  -1   12893    2490                                                       12179   -1.91   -0.31  1.0000
  10  15   1   18813    4230                                                       17948   -1.91    0.31  1.0000
 -11 -15  -1       3    1470                                                           0    1.10    0.06  1.0000
  11  15   1    4081    3490                                                        3850    1.10   -0.06  1.0000
  12  15   1     697    2970                                                         560   -1.63   -0.04  1.0000
 -13 -15  -1    7083    1880                                                        6639    1.60   -0.04  1.0000
  13  15   1    7289    3120                                                        6839    1.60    0.04  1.0000
 -14 -15  -1      30    1760                                                           0    3.26    0.21  1.0000
  -9  16   1   21417    5099                                                       24148    5.41    0.11  1.0000
  -8  16   1   30664    5449                                                       29237    2.47   -0.04  1.0000
  -6  16   1     122    3930                                                         260    3.02    0.01  1.0000
  -2  16   1    1679    3380                                                        1220    3.62   -0.05  1.0000
  -1  16   1   11719    3270                                                       10729   -2.79   -0.01  1.0000
  -1  16   1   15178    2460                                                       14049   -2.79   -0.01  1.0000
   0 -16  -1    3541    1520                                                        2880    3.50    0.26  1.0000
   0  16   1    4533    2990                                                        3780    3.50   -0.26  1.0000
  -2 -16  -1    5879    1800                                                        6209    1.27   -0.29  1.0000
   2  16   1    2820    2970                                                        3050    1.27    0.29  1.0000
  -3 -16  -1      13    1490                                                           0    2.19    0.14  1.0000
   3  16   1      13    2970                                                           0    2.19   -0.14  1.0000
  -4 -16  -1   24086    2880                                                       23758   -0.63    0.01  1.0000
   4  16   1   15269    4040                                                       15008   -0.63   -0.01  1.0000
  -5 -16  -1    4164    1510                                                        3880    1.34    0.07  1.0000
   5  16   1    5713    3490                                                        5379    1.34   -0.07  1.0000
  -6 -16  -1    5056    1580                                                        3810   -5.61    0.17  1.0000
   6  16   1   11646    3420                                                        9709   -5.61   -0.17  1.0000
   7  16   1    8283    3780                                                        9119   -2.68   -0.15  1.0000
  -9 -16  -1    2787    1440                                                        3820   -5.39   -0.10  1.0000
   9  16   1    8187    3570                                                        9899   -5.39    0.10  1.0000
  10  16   1    8966    3750                                                        8869   -0.31   -0.34  1.0000
 -11 -16  -1       6    1490                                                           0    1.49   -0.09  1.0000
  11  16   1    2448    3540                                                        2700    1.49    0.09  1.0000
 -12 -16  -1     214    1620                                                         250    0.71    0.07  1.0000
  12  16   1    6811    3190                                                        7009    0.71   -0.07  1.0000
 -13 -16  -1       6    1590                                                           0    1.50   -0.07  1.0000
  -8  17   1   37282    7229                                                       37186   -0.15    0.06  1.0000
  -7  17   1    1691    4260                                                        2200    3.46   -0.03  1.0000
  -6  17   1    1197    4090                                                        1040   -1.41    0.03  1.0000
  -5  17   1       5    4240                                                           0    1.35    0.00  1.0000
  -4  17   1    2332    4010                                                        3030    4.04    0.00  1.0000
  -3  17   1    9269    4060                                                        9129   -0.44   -0.24  1.0000
  -2  17   1   14844    3690                                                       12499   -6.00    0.06  1.0000
  -1  17   1   22866    3540                                                       25837    5.69    0.06  1.0000
  -2 -17  -1   12248    2890                                                       12919   -1.79    0.04  1.0000
  -4 -17  -1   14949    2860                                                       15578    1.52    0.18  1.0000
  -5 -17  -1   16416    2720                                                       17008   -1.37   -0.19  1.0000
   5  17   1    9107    3900                                                        9549   -1.37    0.19  1.0000
  -6 -17  -1    4436    1710                                                        5059    2.71   -0.10  1.0000
   6  17   1    7733    3640                                                        8549    2.71    0.10  1.0000
  -7 -17  -1    9989    2360                                                        9229    2.32   -0.20  1.0000
   7  17   1   12977    3920                                                       12109    2.32    0.20  1.0000
   8  17   1    8343    3900                                                        9889   -4.83   -0.42  1.0000
  -9 -17  -1   11356    2370                                                       10089    3.66    0.18  1.0000
 -10 -17  -1       9    1510                                                           0    1.70   -0.42  1.0000
  10  17   1    3370    3700                                                        3710    1.70    0.42  1.0000
 -11 -17  -1       0    1400                                                           0   -0.23    0.07  1.0000
  -6  18   1     224    4660                                                         300    1.41   -0.01  1.0000
  -5  18   1       8    4470                                                           0   -1.73   -0.01  1.0000
  -4  18   1     643    4200                                                         720   -0.88    0.00  1.0000
  -3  18   1    4035    3860                                                        3570    2.26    0.09  1.0000
  -2  18   1      21    3400                                                           0    2.73   -0.03  1.0000
  -1  18   1    1017    3560                                                         700   -3.25    0.08  1.0000
   0  18   1     788    3400                                                         510    3.29   -0.14  1.0000
   1  18   1    9691    3670                                                        8469   -3.84    0.20  1.0000
  -3 -18  -1   16596    3210                                                       16038    1.31   -0.12  1.0000
  -4 -18  -1   19420    3140                                                       20548   -2.39   -0.16  1.0000
  -5 -18  -1    5060    1760                                                        5269    0.86    0.42  1.0000
   6  18   1    8861    3850                                                       10009   -3.53   -0.34  1.0000
   7  18   1   11105    3970                                                       10069   -3.01    0.13  1.0000
   8  18   1   10215    4000                                                       11599    3.96    0.21  1.0000
  -9 -18  -1      12    1600                                                           0   -2.07   -0.06  1.0000
 -10 -18  -1       1    1600                                                           0    0.53    0.23  1.0000
  -4  19   1      14    4270                                                           0    2.22   -0.03  1.0000
  -3  19   1       1    3800                                                           0   -0.63   -0.08  1.0000
  -2  19   1    3024    4060                                                        3800   -3.98    0.00  1.0000
  -1  19   1       3    3820                                                           0    1.09    0.02  1.0000
   0  19   1    3767    3460                                                        4420   -3.05    0.21  1.0000
   1  19   1    2116    3620                                                        1580    3.73   -0.10  1.0000
  -5 -19  -1    4238    2010                                                        4610   -1.67   -0.08  1.0000
  -6 -19  -1    1631    1720                                                        2120    3.37   -0.30  1.0000
  -7 -19  -1    4173    1850                                                        3680    2.35    0.26  1.0000
   2  18  -2    3841    2710                                                        4250    1.92    0.21  1.0000
   1  18  -2   21778    3740                                                       23398   -3.22   -0.29  1.0000
  -2  18  -2   23356    3530                                                       23108   -0.49   -0.04  1.0000
  -3  18  -2    5766    2570                                                        6459    2.65    0.15  1.0000
  -3  18  -2     419    3970                                                         620    2.65    0.15  1.0000
  -4  18  -2   42542    7709                                                       41366   -1.72   -0.17  1.0000
  -8 -17   2       5    1450                                                           0    1.36    0.11  1.0000
   7  17  -2    8119    3920                                                        7779   -1.14   -0.27  1.0000
  -7 -17   2    1198    1760                                                        1070   -1.14    0.27  1.0000
   6  17  -2    4012    3910                                                        4810   -3.60    0.09  1.0000
  -6 -17   2      29    1560                                                         130   -3.60   -0.09  1.0000
   5  17  -2    2309    3770                                                        3120    4.67   -0.07  1.0000
  -5 -17   2      61    1650                                                           0    4.67    0.07  1.0000
   4  17  -2    7565    3470                                                        6759   -2.85    0.06  1.0000
   3  17  -2      39    3500                                                           0   -3.72   -0.35  1.0000
   2  17  -2    4063    3190                                                        4050   -0.06   -0.22  1.0000
   2  17  -2   15343    3210                                                       15318   -0.06   -0.22  1.0000
  -2  17  -2   19487    3070                                                       19668    0.39    0.21  1.0000
  -3  17  -2    1934    3820                                                        3360   -8.36   -0.23  1.0000
  -3  17  -2     612    2400                                                        1500   -8.36   -0.23  1.0000
  -4  17  -2    1859    4140                                                        2940    6.64    0.15  1.0000
  -5  17  -2      15    4050                                                           0    2.32    0.02  1.0000
  -6  17  -2    1540    3960                                                        1430    0.85    0.05  1.0000
  -7  17  -2    2162    3930                                                        1190   -7.17   -0.02  1.0000
 -10 -16   2      15    1780                                                           0   -2.28    0.09  1.0000
   9  16  -2    6354    4040                                                        6869    1.89    0.06  1.0000
   8  16  -2    7310    4150                                                        7809    1.72   -0.01  1.0000
   7  16  -2    5253    3780                                                        5079    0.73    0.15  1.0000
   6  16  -2    4298    3810                                                        5059    3.31    0.39  1.0000
   5  16  -2    7102    3740                                                        5609   -5.61   -0.63  1.0000
  -5 -16   2      89    1490                                                           0   -5.61    0.63  1.0000
   4  16  -2    2553    3300                                                        3030    2.70    0.15  1.0000
  -4 -16   2     271    1590                                                         440    2.70   -0.15  1.0000
   3  16  -2    2833    3060                                                        3670    4.40    0.13  1.0000
  -3 -16   2   11470    2570                                                       13099    4.40   -0.13  1.0000
  -1  16  -2   28908    3700                                                       31057   -3.71    0.04  1.0000
  -1  16  -2   25237    5639                                                       27247   -3.71    0.04  1.0000
  -2  16  -2    4369    3560                                                        4580   -0.94   -0.05  1.0000
  -3  16  -2   12149    3740                                                        9789    6.75    0.22  1.0000
  -3  16  -2    2043    2400                                                        1150    6.75    0.22  1.0000
  -4  16  -2    3388    3820                                                        4730   -6.32   -0.28  1.0000
  -5  16  -2    3699    3700                                                        3150    2.81   -0.03  1.0000
  -5  16  -2     548    2620                                                         350    2.81   -0.03  1.0000
  -7  16  -2  175676   18598                                                      188191    8.77   -0.01  1.0000
  -9  16  -2    5067    3320                                                        3850    5.46    0.02  1.0000
 -11 -15   2    5957    1970                                                        7729   -6.42    0.01  1.0000
  10  15  -2    5460    3790                                                        4380    4.62    0.17  1.0000
 -10 -15   2      60    1730                                                           0    4.62   -0.17  1.0000
   9  15  -2   14099    4550                                                       13849    0.63    0.07  1.0000
  -9 -15   2   22021    2930                                                       21708    0.63   -0.07  1.0000
   8  15  -2    5423    3880                                                        4490   -3.97   -0.16  1.0000
  -8 -15   2      44    1450                                                           0   -3.97    0.16  1.0000
   7  15  -2       3    3720                                                           0    0.97   -0.39  1.0000
   6  15  -2    2001    3670                                                        2810   -4.95   -0.37  1.0000
   5  15  -2      51    3460                                                           0    4.19    0.90  1.0000
  -5 -15   2      51    1530                                                           0    4.19   -0.90  1.0000
   4  15  -2    6444    3250                                                        7399   -3.43   -0.85  1.0000
  -4 -15   2    4184    1520                                                        4960   -3.43    0.85  1.0000
  -3 -15   2   16002    2540                                                       17438   -3.32   -0.28  1.0000
   2  15  -2   32520    5729                                                       31247    2.13   -0.50  1.0000
   2  15  -2   33683    4430                                                       32387    2.13   -0.50  1.0000
  -2 -15   2   44009    3920                                                       42526    2.13    0.50  1.0000
   1  15  -2   28855    3790                                                       29977    1.95    0.41  1.0000
  -2  15  -2   12216    3450                                                       11229    2.73    0.12  1.0000
  -2  15  -2   11600    2650                                                       10639    2.73    0.12  1.0000
  -3  15  -2     804    3520                                                         110  -10.69   -0.17  1.0000
  -4  15  -2     210    3350                                                           0    8.66    0.16  1.0000
  -6  15  -2  166181   16628                                                      168573    1.75    0.03  1.0000
  -8  15  -2   34776    5739                                                       34807    0.05    0.00  1.0000
  -9  15  -2     520    3170                                                         370   -2.13    0.00  1.0000
 -10  15  -2    8264    3320                                                        8279    0.05    0.01  1.0000
  12  14  -2    1677    3920                                                        2340   -4.44   -0.05  1.0000
 -12 -14   2   10755    2510                                                       12349   -4.44    0.05  1.0000
  11  14  -2    1265    3780                                                         390    9.46   -0.03  1.0000
 -11 -14   2    1658    1660                                                         620    9.46    0.03  1.0000
  10  14  -2    1689    3720                                                        2210   -3.53   -0.24  1.0000
 -10 -14   2    2236    1910                                                        2830   -3.53    0.24  1.0000
   9  14  -2    3440    3910                                                        3950   -2.51    0.10  1.0000
  -9 -14   2     606    1670                                                         830   -2.51   -0.10  1.0000
   8  14  -2    9059    3970                                                        7759    4.24    0.02  1.0000
  -8 -14   2    9361    1740                                                        8039    4.24   -0.02  1.0000
   7  14  -2    2132    3560                                                        1800   -2.24    0.22  1.0000
   6  14  -2    7833    3640                                                        6889    3.29    0.16  1.0000
  -6 -14   2    4738    1470                                                        4010    3.29   -0.16  1.0000
   5  14  -2     194    3190                                                          20   -5.62   -0.69  1.0000
  -5 -14   2    3646    1340                                                        2600   -5.62    0.69  1.0000
   4  14  -2    3686    3040                                                        4340    3.08    1.06  1.0000
  -4 -14   2    5169    1530                                                        5939    3.08   -1.06  1.0000
   3  14  -2    4258    2190                                                        5179    4.00   -0.50  1.0000
  -3 -14   2    2319    1530                                                        3010    4.00    0.50  1.0000
   2  14  -2    1614    2770                                                        2190   -3.96    0.40  1.0000
  -2 -14   2    2689    1360                                                        3420   -3.96   -0.40  1.0000
  -1 -14   2   12843    2310                                                       12679   -0.44   -0.15  1.0000
   0  14  -2    2637    2510                                                        2690   -0.31    0.01  1.0000
   0 -14   2    3727    1450                                                        3790   -0.31   -0.01  1.0000
  -1  14  -2   23211    3040                                                       21068   -4.31   -0.24  1.0000
  -2  14  -2    9524    3300                                                        9919   -1.20   -0.09  1.0000
  -2  14  -2    7889    2180                                                        8249   -1.20   -0.09  1.0000
  -3  14  -2    4193    1840                                                        7299   12.37    0.11  1.0000
  -8  14  -2    4386    3060                                                        3880   -2.36   -0.09  1.0000
  -9  14  -2   20344    4960                                                       23098    5.59    0.05  1.0000
 -10  14  -2   20536    4800                                                       18488   -4.38   -0.03  1.0000
 -11  14  -2    6229    3030                                                        5069   -4.62    0.05  1.0000
 -12  14  -2    6040    3070                                                        6449    1.55   -0.08  1.0000
  13  13  -2    2801    3250                                                        2760   -0.23    0.01  1.0000
 -13 -13   2    3053    1800                                                        3010   -0.23   -0.01  1.0000
  12  13  -2     426    3580                                                         910    5.70    0.08  1.0000
 -12 -13   2    2238    1680                                                        3230    5.70   -0.08  1.0000
  11  13  -2    1708    3820                                                        3120   -8.69    0.01  1.0000
 -11 -13   2    3347    1740                                                        5239   -8.69   -0.01  1.0000
  10  13  -2    9272    3640                                                        8089    3.80    0.01  1.0000
 -10 -13   2    7088    1740                                                        6059    3.80   -0.01  1.0000
   9  13  -2   11128    4180                                                       11639    1.43   -0.07  1.0000
  -9 -13   2   16320    2550                                                       16938    1.43    0.07  1.0000
   8  13  -2    9329    4050                                                       11469   -6.28   -0.11  1.0000
  -8 -13   2   13588    2810                                                       16148   -6.28    0.11  1.0000
  -7 -13   2   12710    2440                                                       12779    0.18    0.09  1.0000
   6  13  -2       0    3360                                                           0   -0.25   -0.33  1.0000
   5  13  -2    1678    3060                                                        2080    2.77    0.47  1.0000
  -5 -13   2    2412    1310                                                        2890    2.77   -0.47  1.0000
   4  13  -2   31693    4880                                                       31297   -0.67   -0.35  1.0000
  -4 -13   2   37174    3500                                                       36746   -0.67    0.35  1.0000
   3  13  -2   71367    7819                                                       66533   -5.51    0.24  1.0000
  -3 -13   2   87545    6649                                                       82182   -5.51   -0.24  1.0000
   2  13  -2   31843    3940                                                       35506    5.97   -0.20  1.0000
   2  13  -2   31333    5159                                                       34967    5.97   -0.20  1.0000
  -2 -13   2   29923    3570                                                       33477    5.97    0.20  1.0000
   1  13  -2   26854    2890                                                       26617   -0.43   -0.28  1.0000
   1  13  -2   20575    4540                                                       20368   -0.43   -0.28  1.0000
  -1 -13   2   18686    2820                                                       18488   -0.43    0.28  1.0000
   0  13  -2   37054    5419                                                       37166    0.17    0.18  1.0000
   0  13  -2   38042    4190                                                       38156    0.17    0.18  1.0000
   0 -13   2   37723    3780                                                       37836    0.17   -0.18  1.0000
  -1  13  -2    9564    2910                                                       10789    3.63    0.14  1.0000
   1 -13   2    8014    1880                                                        9139    3.63   -0.14  1.0000
  -2  13  -2   14002    2470                                                       15598    3.92   -0.07  1.0000
  -3  13  -2       4    2760                                                         370  -10.37   -0.13  1.0000
  -4  13  -2   88383    9809                                                       99210   10.57    0.25  1.0000
  -5  13  -2   67001    6289                                                       61514   -6.47   -0.04  1.0000
  -7  13  -2    2130    2740                                                        2620    3.01   -0.05  1.0000
  -8  13  -2    5197    2790                                                        6089   -3.55    0.10  1.0000
  -9  13  -2    3750    2830                                                        2420   -7.20   -0.06  1.0000
 -10  13  -2   14748    4390                                                       16448    4.07    0.03  1.0000
 -11  13  -2    2500    2860                                                        3330    4.61    0.01  1.0000
 -12  13  -2    7161    3050                                                        6239   -3.37    0.03  1.0000
 -13  13  -2   10387    3210                                                        9339    3.16   -0.10  1.0000
 -14 -12   2    5046    2650                                                        4610   -1.88   -0.01  1.0000
  13  12  -2       7    3190                                                           0    1.54   -0.02  1.0000
 -13 -12   2    2690    2470                                                        2430    1.54    0.02  1.0000
  12  12  -2    2679    3640                                                        1830   -5.37   -0.07  1.0000
  11  12  -2     504    3720                                                        1230    7.54   -0.05  1.0000
 -11 -12   2    2080    2060                                                        3390    7.54    0.05  1.0000
  10  12  -2      34    3440                                                           0   -3.50    0.12  1.0000
 -10 -12   2    2816    1810                                                        2230   -3.50   -0.12  1.0000
   9  12  -2   10897    3780                                                        9559   -4.23   -0.36  1.0000
   8  12  -2    7551    3620                                                        8889    4.40    0.33  1.0000
  -8 -12   2    3537    1510                                                        4470    4.40   -0.33  1.0000
   7  12  -2       1    3260                                                           0    0.42    0.15  1.0000
   6  12  -2       8    3130                                                           0   -1.66    0.22  1.0000
  -6 -12   2    1219    1440                                                        1420   -1.66   -0.22  1.0000
   5  12  -2    3190    2890                                                        3050    0.75   -0.30  1.0000
   4  12  -2    9698    2890                                                        9889   -0.58    0.40  1.0000
  -4 -12   2    6364    1360                                                        6519   -0.58   -0.40  1.0000
   3  12  -2   19277    3130                                                       21838    5.34   -0.11  1.0000
  -3 -12   2   15457    2300                                                       17758    5.34    0.11  1.0000
   2  12  -2    4606    2180                                                        3570   -4.85    0.08  1.0000
   1  12  -2    9276    2610                                                        9509    0.72    0.18  1.0000
  -1 -12   2    9987    2080                                                       10229    0.72   -0.18  1.0000
   0  12  -2    2719    2420                                                        2470   -1.46   -0.24  1.0000
  -1  12  -2       3    2630                                                           0    1.05   -0.07  1.0000
  -1  12  -2     601    1570                                                         690    1.05   -0.07  1.0000
   1 -12   2     694    1070                                                         790    1.05    0.07  1.0000
  -2  12  -2   37861    5089                                                       34617   -5.10   -0.03  1.0000
   2 -12   2   34081    3130                                                       31007   -5.10    0.03  1.0000
  -3  12  -2   26754    3770                                                       34137   12.67   -0.06  1.0000
  -4  12  -2   74313    8199                                                       82822   -9.08   -0.07  1.0000
  -5  12  -2   13291    3690                                                       14399    2.82    0.06  1.0000
  -6  12  -2    7899    2670                                                        8249   -1.16   -0.08  1.0000
  -7  12  -2    4487    2420                                                        2780   -8.53    0.00  1.0000
  -8  12  -2    9490    2680                                                        8669    2.58   -0.01  1.0000
  -9  12  -2    1212    2430                                                        1900    5.25   -0.03  1.0000
 -10  12  -2   34773    5549                                                       37556   -4.38   -0.01  1.0000
 -11  12  -2   58844    7199                                                       58284   -0.69    0.03  1.0000
 -12  12  -2    4659    2960                                                        5309    2.76    0.02  1.0000
 -13  12  -2    6314    2970                                                        5999   -1.20   -0.01  1.0000
 -14  12  -2    3025    3190                                                        4330    6.46   -0.03  1.0000
 -15 -11   2   21788    4670                                                       20038   -3.62    0.02  1.0000
  14  11  -2    1553    3440                                                        2110    3.90    0.00  1.0000
 -14 -11   2     864    2910                                                        1290    3.90    0.00  1.0000
 -13 -11   2   17597    4370                                                       17928    0.74    0.01  1.0000
  12  11  -2       8    3370                                                           0    1.71   -0.01  1.0000
 -12 -11   2       8    2730                                                           0    1.71    0.01  1.0000
  10  11  -2   20036    4380                                                       19718   -0.67   -0.08  1.0000
 -10 -11   2   23271    3830                                                       22928   -0.67    0.08  1.0000
   9  11  -2   10124    3580                                                        8599    4.72    0.26  1.0000
  -9 -11   2    4654    2110                                                        3640    4.72   -0.26  1.0000
   8  11  -2      32    3480                                                           0   -3.38   -0.36  1.0000
   7  11  -2    5051    3300                                                        5379   -1.36    0.14  1.0000
  -7 -11   2    7647    1980                                                        8049   -1.36   -0.14  1.0000
   5  11  -2      30    2780                                                           0    3.26    0.15  1.0000
  -5 -11   2     886    1370                                                        1240    3.26   -0.15  1.0000
   4  11  -2   19375    3880                                                       19938   -1.20   -0.27  1.0000
  -4 -11   2   23765    2640                                                       24388   -1.20    0.27  1.0000
  -2 -11   2    9034    1310                                                        7749    4.20    0.12  1.0000
   0  11  -2   33222    3290                                                       31827    2.31    0.01  1.0000
   0  11  -2   24258    4720                                                       23068    2.31    0.01  1.0000
   0 -11   2   28242    2940                                                       26957    2.31   -0.01  1.0000
  -1  11  -2    5473    2460                                                        5679    0.82    0.32  1.0000
   1 -11   2    4014    1150                                                        4190    0.82   -0.32  1.0000
  -2  11  -2   55584    5949                                                       54965    0.79   -0.16  1.0000
  -2  11  -2   64531    6519                                                       63864    0.79   -0.16  1.0000
   2 -11   2   55132    5059                                                       54515    0.79    0.16  1.0000
   3 -11   2    2829     820                                                        2010   -5.00   -0.20  1.0000
  -4  11  -2   49712    5339                                                       47775    2.62   -0.06  1.0000
  -5  11  -2      35    2190                                                           0   -3.55    0.06  1.0000
  -6  11  -2    3284    2240                                                        2820   -2.51    0.06  1.0000
  -7  11  -2     230    2250                                                           0    9.06   -0.07  1.0000
  -8  11  -2    1387    2160                                                        1160   -1.90    0.08  1.0000
  -9  11  -2    1387    2350                                                        2470   -7.45    0.06  1.0000
 -10  11  -2   62824    6909                                                       56924    7.21   -0.04  1.0000
 -11  11  -2    5883    2660                                                        4620    5.22    0.07  1.0000
 -12  11  -2   20063    4370                                                       17968   -4.55   -0.05  1.0000
 -13  11  -2     361    2880                                                         670    4.12    0.01  1.0000
 -14  11  -2    1129    3000                                                        1840   -5.56    0.00  1.0000
  15  10  -2    6863    3230                                                        6119    2.76   -0.04  1.0000
 -15 -10   2     871    2910                                                         620    2.76    0.04  1.0000
  14  10  -2       1    3350                                                           0   -0.59    0.01  1.0000
 -14 -10   2       1    2590                                                           0   -0.59   -0.01  1.0000
  13  10  -2   10903    3190                                                        9989   -2.67   -0.06  1.0000
 -13 -10   2    9470    2800                                                        8619   -2.67    0.06  1.0000
 -11 -10   2       3    2360                                                           0    0.98   -0.03  1.0000
  10  10  -2     253    3390                                                         230   -0.45    0.04  1.0000
 -10 -10   2    2149    2380                                                        2080   -0.45   -0.04  1.0000
   9  10  -2    3952    3470                                                        4850   -4.05   -0.12  1.0000
  -9 -10   2      46    2280                                                           0   -4.05    0.12  1.0000
   8  10  -2   14649    4250                                                       16398    4.20    0.24  1.0000
  -6 -10   2   23590    2970                                                       22558   -2.03   -0.24  1.0000
   5  10  -2      71    2800                                                           0   -5.03    0.07  1.0000
  -5 -10   2    3969    1160                                                        2980   -5.03   -0.07  1.0000
   4  10  -2   85639    9279                                                       89721    4.12   -0.19  1.0000
  -4 -10   2   82659    7739                                                       86671    4.12    0.19  1.0000
   3  10  -2   50725    4870                                                       49595    1.51   -0.12  1.0000
  -3 -10   2   37791    4030                                                       36816    1.51    0.12  1.0000
  -1  10  -2   29978    3140                                                       29147   -1.45   -0.30  1.0000
  -1  10  -2   26793    4460                                                       26007   -1.45   -0.30  1.0000
   1 -10   2   27077    2770                                                       26287   -1.45    0.30  1.0000
  -3  10  -2   24001    2450                                                       23338   -1.29   -0.21  1.0000
  -4  10  -2   35918    4680                                                       35086   -1.32    0.00  1.0000
  -5  10  -2    1709    2120                                                        2030    2.22    0.01  1.0000
  -6  10  -2    6898    2240                                                        6279   -2.28   -0.04  1.0000
  -7  10  -2   17286    3290                                                       13479   -9.20    0.04  1.0000
  -8  10  -2    4490    2220                                                        6339    7.54   -0.06  1.0000
  -9  10  -2   16724    3910                                                       18908    4.90   -0.03  1.0000
 -10  10  -2    9468    2550                                                        8069   -4.47    0.04  1.0000
 -11  10  -2   30667    4910                                                       29887    1.34   -0.11  1.0000
 -12  10  -2    4201    2700                                                        4610    1.84    0.09  1.0000
 -13  10  -2    4473    2820                                                        4970   -2.16   -0.08  1.0000
 -14  10  -2    7680    3140                                                        7309    1.28   -0.02  1.0000
 -15  10  -2     264    3150                                                         400    2.25    0.00  1.0000
 -16  -9   2    2479    2590                                                        2830    2.04    0.16  1.0000
  15   9  -2       1    3020                                                           0   -0.47    0.13  1.0000
 -15  -9   2       1    2500                                                           0   -0.47   -0.13  1.0000
  14   9  -2    3917    3440                                                        3590   -1.60    0.00  1.0000
 -14  -9   2    3184    2500                                                        2890   -1.60    0.00  1.0000
  13   9  -2     139    3160                                                         230    2.03    0.03  1.0000
 -13  -9   2      11    2440                                                           0    2.03   -0.03  1.0000
  12   9  -2   10905    3080                                                       10869   -0.10   -0.05  1.0000
  11   9  -2       5    3290                                                           0   -1.33    0.01  1.0000
 -11  -9   2    6576    2220                                                        6219   -1.33   -0.01  1.0000
   9   9  -2   60459    7189                                                       62194    2.09    0.23  1.0000
  -8  -9   2       0    1770                                                           0    0.04    0.14  1.0000
  -7  -9   2   32193    3880                                                       30807   -2.33    0.07  1.0000
   6   9  -2       2    3010                                                           0    0.87   -0.03  1.0000
  -6  -9   2       2    1890                                                           0    0.87    0.03  1.0000
   4   9  -2   27290    3850                                                       24428   -5.32    0.08  1.0000
  -4  -9   2   26074    2570                                                       23278   -5.32   -0.08  1.0000
  -3  -9   2   48080    4390                                                       47355   -0.99   -0.02  1.0000
   2   9  -2   90063    9189                                                       90781   -0.71   -0.22  1.0000
  -2  -9   2   90551    7949                                                       91271   -0.71    0.22  1.0000
   0   9  -2   47907    5749                                                       45345    3.55    0.02  1.0000
   0   9  -2   55136    4950                                                       52385    3.55    0.02  1.0000
   0  -9   2   45934    4340                                                       43426    3.55   -0.02  1.0000
  -1   9  -2    2546    2070                                                        3100   -3.12    0.05  1.0000
   2  -9   2   35198    3280                                                       35656   -0.73    0.03  1.0000
  -3   9  -2   25723    3620                                                       26227    0.93    0.25  1.0000
  -4   9  -2    6748    2130                                                        5569   -4.50   -0.08  1.0000
  -5   9  -2   52064    6069                                                       51865   -0.26   -0.05  1.0000
  -6   9  -2   11704    3100                                                       10799    2.55    0.12  1.0000
  -7   9  -2   26804    4370                                                       31227    7.77    0.02  1.0000
  -8   9  -2    1227    1960                                                        1410   -1.51   -0.02  1.0000
  -9   9  -2   30697    4460                                                       29287   -2.43    0.10  1.0000
 -10   9  -2   40924    5689                                                       44096    4.60   -0.01  1.0000
 -11   9  -2   40264    5319                                                       36876   -5.16    0.02  1.0000
 -12   9  -2      48    2600                                                           0    4.13   -0.07  1.0000
 -13   9  -2    4093    2890                                                        3340   -3.70    0.09  1.0000
 -14   9  -2    5078    3010                                                        5719   -2.61    0.00  1.0000
 -15   9  -2    2057    3020                                                        1600   -3.20   -0.01  1.0000
 -16   9  -2   10582    3340                                                        9989    1.75    0.10  1.0000
  16   8  -2    1501    2950                                                        1560   -0.44    0.10  1.0000
 -16  -8   2    1688    2660                                                        1750   -0.44   -0.10  1.0000
  15   8  -2       1    2760                                                           0    0.66   -0.15  1.0000
 -15  -8   2       1    2540                                                           0    0.66    0.15  1.0000
  14   8  -2       5    3270                                                           0   -1.29    0.03  1.0000
  13   8  -2      17    3240                                                           0   -2.43   -0.08  1.0000
 -12  -8   2    2332    2080                                                        2140   -1.21   -0.15  1.0000
  10   8  -2   34202    5499                                                       33167   -1.69    0.04  1.0000
 -10  -8   2   43940    4440                                                       42766   -1.69   -0.04  1.0000
  -9  -8   2       7    1820                                                           0    1.63    0.06  1.0000
   8   8  -2   12964    3470                                                       11969   -2.67    0.06  1.0000
   7   8  -2      43    3120                                                           0    3.91   -0.04  1.0000
  -7  -8   2      43    1760                                                           0    3.91    0.04  1.0000
   5   8  -2     757    2930                                                        1750   -8.56    0.04  1.0000
  -5  -8   2     413    1660                                                        1200   -8.56   -0.04  1.0000
   4   8  -2     733    2420                                                         330    5.33   -0.03  1.0000
  -4  -8   2     748    1610                                                         340    5.33    0.03  1.0000
   3   8  -2  132786   12469                                                      137246    3.63   -0.14  1.0000
  -3  -8   2  107669   10709                                                      111689    3.63    0.14  1.0000
   0   8  -2    7975    2060                                                        6689   -4.50    0.03  1.0000
   0  -8   2    8575    1070                                                        7239   -4.50   -0.03  1.0000
   2  -8   2   42708    4050                                                       45795   -4.39    0.10  1.0000
  -3   8  -2     636    1760                                                         660   -0.28   -0.11  1.0000
  -4   8  -2   16012    3320                                                       14689    3.19    0.13  1.0000
  -5   8  -2   15513    3280                                                       16198    1.63   -0.05  1.0000
  -6   8  -2   73686    8359                                                       78312   -5.02   -0.06  1.0000
  -7   8  -2    4293    1940                                                        4530   -1.07    0.04  1.0000
  -8   8  -2    2646    1950                                                        2850    1.17    0.02  1.0000
   8  -8   2       4    1310                                                           0    1.17   -0.02  1.0000
  -9   8  -2   26039    4010                                                       24178    3.51   -0.18  1.0000
 -10   8  -2   11884    2590                                                       11079   -2.25    0.09  1.0000
 -11   8  -2    5797    2450                                                        5869    0.28   -0.12  1.0000
 -12   8  -2      44    2350                                                           0   -3.96    0.04  1.0000
 -12   8  -2    2033    1030                                                        1480   -3.96    0.04  1.0000
 -13   8  -2    5336    1830                                                        4500    3.57   -0.04  1.0000
 -13   8  -2    3922    2540                                                        3210    3.57   -0.04  1.0000
 -14   8  -2    1981    2590                                                        1840   -0.96    0.01  1.0000
 -17  -7   2   14482    3720                                                       15608   -2.75    0.06  1.0000
  16   7  -2       2    2890                                                           0    0.90   -0.05  1.0000
 -16  -7   2       2    2330                                                           0    0.90    0.05  1.0000
  15   7  -2       4    2870                                                           0   -1.14    0.13  1.0000
 -15  -7   2    4132    2110                                                        4380   -1.14   -0.13  1.0000
  14   7  -2       3    2890                                                           0    0.98   -0.07  1.0000
 -14  -7   2    2946    1940                                                        2770    0.98    0.07  1.0000
 -11  -7   2   81323    7489                                                       81432   -0.11   -0.02  1.0000
  10   7  -2    2505    2940                                                        2000    3.19    0.01  1.0000
 -10  -7   2    2427    1650                                                        1930    3.19   -0.01  1.0000
   9   7  -2   10511    3400                                                       10719   -0.60    0.00  1.0000
  -9  -7   2   14950    2660                                                       15198   -0.60    0.00  1.0000
  -8  -7   2       0    1510                                                           0   -0.38   -0.03  1.0000
   7   7  -2   42280    5839                                                       43726   -2.08    0.08  1.0000
  -7  -7   2   45938    4550                                                       47445   -2.08   -0.08  1.0000
  -6  -7   2   59104    5409                                                       56604   -3.11    0.15  1.0000
   2   7  -2   73710    7009                                                       76472    3.01   -0.26  1.0000
   2   7  -2   58128    6839                                                       60584    3.01   -0.26  1.0000
  -2  -7   2   64184    5899                                                       66763    3.01    0.26  1.0000
   1   7  -2    6142    1900                                                        7579   -5.20    0.19  1.0000
  -1  -7   2    5683    1470                                                        7069   -5.20   -0.19  1.0000
   0   7  -2   16226    3240                                                       18168    4.43    0.02  1.0000
   0  -7   2   14660    1820                                                       16508    4.43   -0.02  1.0000
  -3   7  -2    2052    1780                                                        3030   -5.83    0.06  1.0000
  -4   7  -2   13408    3110                                                       13469   -0.16   -0.05  1.0000
  -5   7  -2    1300    1740                                                        1240   -0.50    0.11  1.0000
  -6   7  -2   31885    3910                                                       27177    8.20   -0.01  1.0000
  -7   7  -2    8336    2130                                                        8429    0.30    0.04  1.0000
  -9   7  -2     986    2030                                                         900    0.84    0.21  1.0000
 -10   7  -2   51768    6269                                                       53445   -2.19   -0.17  1.0000
 -11   7  -2      42    1950                                                           0   -3.88    0.15  1.0000
 -11   7  -2    2246    1020                                                        2120   -3.88    0.15  1.0000
 -12   7  -2    3601    1540                                                        2910    3.63   -0.07  1.0000
 -13   7  -2   15301    3100                                                       16808   -3.56    0.09  1.0000
 -14   7  -2    2411    1780                                                        2400    0.07   -0.01  1.0000
 -16   7  -2       1    1650                                                           0   -0.48   -0.02  1.0000
  17   6  -2      13    3690                                                           0    2.15    0.03  1.0000
 -17  -6   2    5920    2070                                                        5379    2.15   -0.03  1.0000
  16   6  -2    1099    3240                                                         770   -3.23    0.04  1.0000
 -16  -6   2    9258    2120                                                        8249   -3.23   -0.04  1.0000
  15   6  -2       0    2810                                                           0   -0.35   -0.11  1.0000
 -15  -6   2     629    1980                                                         600   -0.35    0.11  1.0000
 -14  -6   2    1190    1960                                                         880   -2.89    0.03  1.0000
 -13  -6   2      25    1890                                                           0    2.96    0.05  1.0000
 -12  -6   2   21319    3470                                                       19658   -3.47   -0.08  1.0000
  11   6  -2       2    2510                                                           0    0.86   -0.06  1.0000
 -11  -6   2    1166    1950                                                        1070    0.86    0.06  1.0000
  10   6  -2   11209    3500                                                       11729   -1.45    0.10  1.0000
 -10  -6   2   16714    3170                                                       17348   -1.45   -0.10  1.0000
  -9  -6   2       0    1790                                                           0    0.41    0.05  1.0000
   7   6  -2    1991    3060                                                        1860   -0.89    0.07  1.0000
  -7  -6   2    4150    1580                                                        3960   -0.89   -0.07  1.0000
  -6  -6   2   34858    3570                                                       32537    3.78    0.02  1.0000
   4   6  -2   43867    5499                                                       48005    5.77    0.01  1.0000
   3   6  -2   44126    5609                                                       47575   -4.82   -0.12  1.0000
  -3  -6   2   50780    4800                                                       54475   -4.82    0.12  1.0000
   0   6  -2   24400    3290                                                       22528   -3.66   -0.09  1.0000
   0  -6   2   23390    2190                                                       21558   -3.66    0.09  1.0000
  -2   6  -2   57311    6019                                                       55614   -2.14   -0.08  1.0000
  -3   6  -2   75870    7709                                                       72803    3.36   -0.07  1.0000
  -4   6  -2     913    1570                                                         500    4.70    0.09  1.0000
  -5   6  -2  234116   23508                                                      235976   -1.15   -0.06  1.0000
  -6   6  -2   11617    3120                                                       12799   -3.20   -0.04  1.0000
  -8   6  -2   29962    4300                                                       31287   -2.26    0.05  1.0000
  -9   6  -2    1243    1750                                                        1000   -2.17   -0.17  1.0000
[truncated: 2,340,717 more chars]
